# Supplementary material for: Epidemiology and disease burden of complex wounds for inpatients in China: an observational study from Sichuan province
Source: PubMed Central journal article supplement — BMJ Open. 2020 Nov 6;10(11):e039894. doi: 10.1136/bmjopen-2020-039894 (PMC7651747; doi:10.1136/bmjopen-2020-039894), 2020-11-06
Supplement: bmjopen-2020-039894.draft_revisions.pdf [file bmjopen-2020-039894.draft_revisions.pdf]

# BMJ Open

BMJ Open is committed to open peer review. As part of this commitment we make the peer review history of every article we publish publicly available.

When an article is published we post the peer reviewers' comments and the authors' responses online. We also post the versions of the paper that were used during peer review. These are the versions that the peer review comments apply to.

The versions of the paper that follow are the versions that were submitted during the peer review process. They are not the versions of record or the final published versions. They should not be cited or distributed as the published version of this manuscript.

BMJ Open is an open access journal and the full, final, typeset and author-corrected version of record of the manuscript is available on our site with no access controls, subscription charges or pay-per-view fees (<http://bmjopen.bmj.com>).

If you have any questions on BMJ Open's open peer review process please email [info.bmjopen@bmj.com](mailto:info.bmjopen@bmj.com)

# BMJ Open

## Epidemiology and disease burden of complex wounds for inpatients in China: an observational study from Sichuan province

|                               |                                                                                                                                                                                                                                                                                                                                                                                                                                                            |
|-------------------------------|------------------------------------------------------------------------------------------------------------------------------------------------------------------------------------------------------------------------------------------------------------------------------------------------------------------------------------------------------------------------------------------------------------------------------------------------------------|
| Journal:                      | <i>BMJ Open</i>                                                                                                                                                                                                                                                                                                                                                                                                                                            |
| Manuscript ID                 | bmjopen-2020-039894                                                                                                                                                                                                                                                                                                                                                                                                                                        |
| Article Type:                 | Original research                                                                                                                                                                                                                                                                                                                                                                                                                                          |
| Date Submitted by the Author: | 30-Apr-2020                                                                                                                                                                                                                                                                                                                                                                                                                                                |
| Complete List of Authors:     | Jiang, Qingling; Sichuan University, West China School of Public Health and West China Fourth Hospital; Sichuan University, West China Research Center for Rural Health Development<br>Dumville, Jo C.; Univ Manchester,<br>Cullum, Nicky; The University of Manchester, School of Nursing, Midwifery & Social Work<br>Pan, Jay; Sichuan University,<br>Liu, Zhenmi; Sichuan University, West China School of Public Health and West China Fourth Hospital |
| Keywords:                     | EPIDEMIOLOGY, HEALTH ECONOMICS, PUBLIC HEALTH                                                                                                                                                                                                                                                                                                                                                                                                              |
|                               |                                                                                                                                                                                                                                                                                                                                                                                                                                                            |

SCHOLARONE™  
Manuscripts

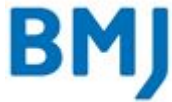

I, the Submitting Author has the right to grant and does grant on behalf of all authors of the Work (as defined in the below author licence), an exclusive licence and/or a non-exclusive licence for contributions from authors who are: i) UK Crown employees; ii) where BMJ has agreed a CC-BY licence shall apply, and/or iii) in accordance with the terms applicable for US Federal Government officers or employees acting as part of their official duties; on a worldwide, perpetual, irrevocable, royalty-free basis to BMJ Publishing Group Ltd ("BMJ") its licensees and where the relevant Journal is co-owned by BMJ to the co-owners of the Journal, to publish the Work in this journal and any other BMJ products and to exploit all rights, as set out in our [licence](#).

The Submitting Author accepts and understands that any supply made under these terms is made by BMJ to the Submitting Author unless you are acting as an employee on behalf of your employer or a postgraduate student of an affiliated institution which is paying any applicable article publishing charge ("APC") for Open Access articles. Where the Submitting Author wishes to make the Work available on an Open Access basis (and intends to pay the relevant APC), the terms of reuse of such Open Access shall be governed by a Creative Commons licence – details of these licences and which [Creative Commons](#) licence will apply to this Work are set out in our licence referred to above.

Other than as permitted in any relevant BMJ Author's Self Archiving Policies, I confirm this Work has not been accepted for publication elsewhere, is not being considered for publication elsewhere and does not duplicate material already published. I confirm all authors consent to publication of this Work and authorise the granting of this licence.

## Epidemiology and disease burden of complex wounds for inpatients in China: an observational study from Sichuan province

Qingling Jiang<sup>1,2</sup>, Jo C Dumville<sup>3</sup>, Nicky Cullum<sup>3</sup>, Jay Pan<sup>1,2\*</sup>, Zhenmi Liu<sup>1\*</sup>

1. West China School of Public Health and West China Fourth Hospital, Sichuan University, China

2. West China Research Center for Rural Health Development, Sichuan University, China

3. Division of Nursing, Midwifery and Social Work, School of Health Sciences, Faculty of Biology, Medicine and Health, University of Manchester, Manchester Academic Health Science Centre, Manchester, UK.

\* Corresponding authors: [panjie.jay@scu.edu.cn](mailto:panjie.jay@scu.edu.cn); [zhenmiliu@scu.edu.cn](mailto:zhenmiliu@scu.edu.cn)

### ABSTRACT

**Objectives:** To investigate the period prevalence of complex wounds among the overall inpatients, and the impact of complex wounds on inpatient health expense and length of hospital stay.

**Design:** An observational study.

**Setting:** 6,056 health care institutions across Sichuan province in China.

**Participants:** This study included 4,033,763 people admitted to health care institutions during 1 September 2018 and 31 December 2018.

**Results:** The point prevalence of complex wounds was 4.07 per 1,000 among inpatients and 0.19 per 1,000 among residents in Sichuan. The most common complex wounds were pressure ulcers (1.47 per 1,000 among inpatients and 0.07 per 1,000 among residents in Sichuan). Older, male, Han ethnic groups and retired people were most likely to suffer from complex wounds. The median length of hospital stay was longer for those with complex wounds as their main condition of treatment compared with all-cause admissions in Sichuan (12 days compared with 7 days;  $P<0.001$ ). The median cost of care for people with complex wounds was higher than for admission for any cause (6,500.18 CNY compared with 3,337.16 CNY;  $P<0.001$ ). People with pressure ulcers had the longest length of stay, whilst people with ulcers related to diabetes incurred the highest costs.

**Conclusions:** Complex wounds, especially pressure ulcers, are common in Sichuan province and their presence is associated with significantly longer lengths of hospital stay and higher medical costs. Additionally, this study only included admitted inpatients during the sampling time period, hence the prevalence of complex wounds may be underestimated. The high prevalence rate and heavy direct and indirect disease burden of complex wounds indicate that health policies for early detection and prevention of complex wounds in elders are urgently needed.

**Strengths and limitations of this study**

- This geographically defined study is the first to report the prevalence and disease burden of complex wounds in inpatients in China.
- Both disease code (ICD-10) and disease diagnosis were used in this study to make sure that complex wounds were correctly identified and classified.
- As this was based on second-hand data, we were unable to identify the patients who may have had complex wounds that were not recorded in discharge records.
- This study only included admitted inpatients during the sampling time period, hence the prevalence of complex wounds may be underestimated.

For peer review only

## INTRODUCTION

Complex wounds (wounds with superficial, partial or full-thickness skin loss healing by secondary intention), such as foot ulcers, legs ulcers, pressure ulcers, open trauma and surgical wounds, heal slowly and are complex to treat and care for:<sup>1,2</sup> they are often referred to as chronic wounds.<sup>3</sup> Complex wounds have been shown to adversely affect the health related quality of life of those affected as they are often painful and can become infected.<sup>4,5</sup> Complex wounds can lead to amputation,<sup>6,7</sup> which causes physical and mental harm, and severely affect productivity. Patients with complex wounds have a higher mortality than people without.<sup>8,9</sup> Management of complex wounds is costly, with crudely estimated annual costs of £3 billion in the UK, \$2.85 billion in Australia and \$25 billion in the USA.<sup>10</sup> In Europe it has been estimated that 2-4% of health care budgets are spent on wound management.<sup>11</sup>

Epidemiological estimates of complex wounds prevalence vary. It was estimated that 6.5 million patients have chronic wounds in the US and 1% of population would experience wounds problem in Denmark.<sup>12,13</sup> In 2003, Rodrigues et al conducted a cross sectional study which included 149 Canadian local community service centers, and found the point prevalence of chronic wounds (including pressure ulcer, venous ulcer, and diabetic foot wound) among home care patients was 1.4%.<sup>14</sup> Using health insurance data, Kristina et al showed that 1.04 % of insured German patients had chronic wounds (including diabetic foot ulcer, pressure ulcer, and leg ulcer), and 0.43 % of them had leg ulcer which was the most common wounds in 2012.<sup>15</sup> Recently, Hall and Gray have conducted community-based multiservice, cross sectional surveys in the UK, found that the point prevalence of complex wounds was 1.47 ‰ in Leeds and 1.64 ‰ in the north of England, and amongst the most frequent wound type was leg ulcer.<sup>1,10</sup> The same survey was carried out in Slovenia and found that the point prevalence of open surgical wounds was 0.38 ‰.<sup>4</sup>

Epidemiological research on complex wounds in China is limited. In 1998, Fu screened 30,000 hospitalized surgical patients in 15 Chinese hospitals for chronic dermal ulcers, and found that the incidence of wounds was from 1.5% to 3.0%, with trauma and infection being the main causes.<sup>16</sup> In 2008, similar surveys were conducted in 17 tertiary hospitals in 14 Chinese provinces, showing the prevalence of chronic wounds was 1.69 per 1,000 inpatients and the leading causes were diabetes and trauma in inpatients.<sup>17</sup> As both studies focused only on specific hospitals, the results may not allow inference on the point prevalence of complex wounds for inpatients national wide. Furthermore these data are now over a decade old and changing population demographics may result in changes in estimates. In this study, we systematically analyzed hospital discharge data from Sichuan province during the fourth quarter of calendar year 2018, aiming to investigate the period prevalence of complex wounds among the overall inpatients, and the impact of complex wounds on inpatient health expense and length of hospital stay (LOS).

## CONTEXT

The Chinese healthcare system is characterized by a three-tier delivery system. The rural three tier system comprises village clinics, township health centers (THCs), and county hospitals; while the urban regions have community health centers/stations (CHCs), city hospitals including district hospitals, and municipal/regional hospitals. Additionally, the county and city hospitals are classified into three levels – primary, secondary and tertiary –

1  
2  
3 with supposedly increasing quality based on their clinical quality, service quality, management  
4 quality, medical safety, and clinical skills and research.<sup>18</sup> THCs and CHCs are called primary  
5 healthcare institutions which mainly provide primary care and public health services. Whilst  
6 primary healthcare institutions have a gatekeeping role to reduce people directly accessing  
7 specialist hospital services, patients can still go directly to higher level hospitals for medical  
8 services without attending THCs or CHCs first. Thus, in China, hospitals *de facto* provide both  
9 primary and specialist care; a significant difference from most health care systems in developed  
10 countries. When people are discharged from healthcare institutions (primary healthcare  
11 institution or hospital), their discharge records, containing demographic details together with  
12 data about their diagnoses and medical care costs, are completed by the Chief Physician (see  
13 Appendix, Table A1). These administrative data provide an opportunity to study the number  
14 of people with complex wounds in more detail. To ensure that data from all relevant people  
15 were considered we included discharge data from all patients from primary healthcare  
16 institutions (THCs/CHCs) and from (primary/secondary/tertiary) hospitals.

17  
18  
19 In China, over 95% of residents have Social Health Insurance (New Cooperative Medical  
20 Scheme for the rural population; Urban Resident Basic Medical Insurance for the unemployed  
21 urban people; Urban Employee Basic Medical Insurance for urban workers) which covers  
22 access to all primary healthcare institutions and public hospitals, and some private hospitals.<sup>19</sup>  
23 The inpatient costs for people with Social Health Insurance consisted of two parts—out-of-  
24 pocket payments and insurance reimbursement, while almost all the outpatient cost are out-of-  
25 pocket. Hence this study assumed that most, if not all, patients with complex wounds would  
26 get inpatient service, instead of outpatient service from healthcare institutions.

27  
28  
29 This study focused on Sichuan province. The results from Sichuan are likely to be applicable  
30 to much of China. Sichuan is the fifth largest and the third most populous province in China  
31 (83.41 million people recorded in 2018). The distribution of economic development is uneven,  
32 the geographic environment is varied, and the composition of the population is diverse. West  
33 Sichuan is sparsely populated, mountainous with poor economic development, and east  
34 Sichuan is densely populated, plain with well economic development, more health care  
35 institutions (see Figure A1 in Appendix). This is roughly consistent with the overall situation  
36 in China.<sup>20,21</sup>

## 37 38 39 40 41 42 43 **METHODS**

### 44 45 **Study population and data source**

46  
47  
48  
49  
50  
51  
52  
53  
54  
55  
56  
57  
58  
59  
60  
Between 1 September 2018 and 31 December 2018, a total of 4,033,763 people were  
admitted to 6,056 health care institutions across Sichuan province. All were included in this  
retrospective, data-based study. Individual-level information was extracted from discharge  
records provided by the Health Information Centre of Sichuan Province. When performing data  
analysis, all healthcare institutions were categorized based on their situation at the time of data  
collection (i.e. in calendar year 2018).

### 61 62 63 64 65 66 67 68 69 70 **Classification of cases**

All people admitted with complex wounds or who developed one or more complex wounds  
during their stay were identified according to the International Statistical Classification of  
Diseases and Related Health Problems 10th Revision (ICD-10) (see Table 1) and the

1  
2  
3 corresponding diagnosis in discharge records. This included people with pressure ulcers of  
4 Stage 2 or above,<sup>22</sup> ulcers in people with diabetes, venous leg ulcers, non-healing surgical  
5 wounds and other ulcers (leg ulcers, upper limb ulcers, skin ulcers, gangrene, infection of  
6 amputation stump). We did not include people with open, traumatic wounds or burns in this  
7 study.  
8  
9

10  
11 [Insert Table 1 about here]  
12

### 13 **Statistical analysis**

14  
15 All analyses were performed using statistical analysis system R-3.5.1. All point prevalence  
16 estimates were produced using the binomial proportion and are presented alongside 95%  
17 confidence intervals (CIs). The inpatient point prevalence of complex wounds was estimated  
18 using the number of people with at least one wound (the numerator) and all inpatients as  
19 denominator. To get a crude estimate of the point prevalence of complex wounds in  
20 community-based population, this study assumed that all people with one or more complex  
21 wounds received inpatient service from healthcare institutions and the point prevalence of  
22 complex wounds for community-based population was estimated using people living in  
23 Sichuan at present and with at least one complex wound (the numerator) and the population of  
24 Sichuan in 2018<sup>23</sup> as the denominator.  
25  
26  
27

28 When estimating the direct disease burden (median of length of stay (LOS) and medical  
29 costs) of complex wounds, only people whose principal cause of hospitalization (principal  
30 diagnosis) was the complex wound were included. Wilcoxon rank sum test and Kruskal-Wallis  
31 rank sum test were used to test if LOS and expense were statistically different between groups.  
32 We also extracted data on people whose principal cause of hospitalization was not the complex  
33 wound but who were recorded as having a complex wound of relevance in this study as a  
34 comorbidity (i.e. though the patient did have one or more complex wound, their main reason  
35 for admission was not the wound), and compared their LOS and inpatient costs with patients  
36 without complex wounds to determine the additional effect of complex wounds on LOS and  
37 inpatient costs. Multivariable linear regression was fitted to control for potentially confounding  
38 factors which were documented. Since the confounders are multilevel in our study, we  
39 constructed a two-level hierarchical linear model, where level 1 covariables included the  
40 patient's age, gender, occupation, social insurance program, whether or not surgery was  
41 required, and Charlson Index (a widely used tool to measure comorbid disease status; a higher  
42 score equals worse health condition) adjusting for non-complex wound related comorbidity;<sup>24</sup>  
43 level 2 covariables included health care institution level type (tertiary hospital, secondary  
44 hospital, primary hospital, unassigned hospital, primary health care institution and others) and  
45 ownership type (public or private). Healthcare institutions were included as a random effect to  
46 account for the within institution correlation for patients admitted in the same institution.  
47  
48  
49  
50  
51  
52

53 To avoid the impact of incorrect records on disease burden estimates, when analyzing the  
54 effect of complex wounds on LOS and inpatient expense, observations were selected based on  
55 the following criteria: 1) the length of stay was at least one day; 2) the per capita inpatient  
56 expense was more than 100 CNY. Thus, ultimately 4,026,725 records were used for  
57 multivariable disease burden analysis.  
58  
59  
60



## RESULTS

### Prevalence of complex wounds

A total of 16,426 cases of patients with complex wounds was identified from the records of 4,033,763 patients during the fourth quarter of calendar year 2018. The point prevalence of complex wounds was 4.07 per 1,000 of inpatients (95% CI: 4.01 to 4.13) and 0.19 per 1,000 of the whole population in Sichuan province (95% CI: 0.19 to 0.20) (Table 2). It should be noted that this prevalence is likely underestimated as it is almost certain that not all patients with complex wounds had been admitted. Pressure ulcers were the most common complex wound with a point prevalence of 1.47 per 1,000 of inpatients (95% CI: 1.43 to 1.50) and 0.07 per 1,000 of the whole population (95% CI: 0.07 to 0.07).

[Insert Table 2 about here]

Table 3 shows the point prevalence estimates for all complex wounds by demographic characteristics. Most inpatients with complex wounds were aged between 60 and 79 years old. The prevalence of complex wounds amongst inpatients increased with age, and was lowest in patients younger than 10 and highest in patients over 90. Males had higher point prevalence estimate (5.05 per 1,000 with 95% CI 4.95 to 5.15) than females (3.19 per 1,000 with 95% CI 3.12 to 3.27). Prevalence was higher for Han (Chinese) than ethnic minorities at 4.17 per 1,000 (95% CI: 4.11 to 4.23) compared with 2.28 per 1,000 (95% CI: 2.08 to 2.49). Of the 16,426 patients with complex wounds, most were agricultural labors from rural areas, and the highest point prevalence estimate occurred in retired people with 10.24 per 1,000 (95% CI: 9.80 to 10.71). After adjusting for age, the prevalence of complex wounds was still significantly different by gender (likelihood ratio test:  $P < 0.001$ ), ethnicity (likelihood ratio test:  $P < 0.001$ ) and occupation (likelihood ratio test:  $P < 0.001$ ).

[Insert table 3 and 4 about here]

Figure 1 shows the point prevalence estimates with 95% confidence intervals for individual complex wound types by demographic characteristics. Prevalence rates for individual wound types increased with age except for venous leg ulcers and non-healing surgical wounds whose highest rates occurred in 60-69 (0.50 per 1,000; 95% CI: 0.45 to 0.55) and 50-59 years old (1.45 per 1,000; 95% CI: 1.36 to 1.56) respectively. The highest point prevalence rates for pressure ulcers, diabetic ulcers and other ulcers were found in patients aged 90 years and over, which were 13.48 per 1,000 (95% CI: 12.30 to 14.78), 1.68 per 1,000 (95% CI: 1.30 to 2.18), 1.56 per 1,000 (95% CI: 1.19 to 2.05), respectively. Children younger than 10 were the least likely to have any complex wounds. Pressure ulcers are the most prevalent complex wound of those studied while venous leg ulcers are the least common, and females have much lower prevalence of all kinds of wounds than males. Prevalence rates for individual wound types were higher for Han (Chinese) than ethnic minorities except for non-healing surgical wounds. The prevalence for individual complex wound types are highly different in occupation groups. The highest prevalence for pressure ulcer (5.89 per 1,000; 95% CI: 5.56 to 6.25) and diabetic ulcer (2.56 per 1,000; 95% CI: 2.35 to 2.80) both occurred in retired patients. Venous leg ulcer, non-healing surgical wounds and other ulcer were most common in agricultural labourers (0.34 per

1,000; 95% CI: 0.31 to 0.36), office clerks (1.47 per 1,000; 95% CI: 1.26 to 1.73), and freelancers (0.78 per 1,000; 95% CI: 0.63 to 0.98), respectively.

[Insert Figure 1 about here]

### Disease burden

Table 4 shows the central tendency and dispersion of per capita hospital LOS and medical costs for inpatients whose principal diagnosis was a complex wound. The median per capita LOS was 12 days (IQR: 7 to 22), which is significantly longer than the median per capita LOS for all inpatient in Sichuan (median: 7 days; IQR: 4 to 10;  $P<0.001$ ). The median per capita medical cost for people with a complex wound was 6,500.18 CNY (IQR: 2,965.92 to 1,2975.23); nearly double the care costs of inpatients without complex wounds (median: 3,337.16; IQR: 1,759.02; 6,703.08;  $P<0.001$ ). Patients with a principal diagnosis of pressure ulcer had the longest LOS (median: 20 days; IQR: 9 to 34). The median per capita LOS for patients whose principal diagnosis was diabetic ulcer, venous leg ulcer, surgical ulcer or other ulcer were 13 days (IQR: 7 to 22), 9 days (IQR: 7 to 14), 11 days (IQR: 7 to 20) and 13 days (IQR: 7 to 24) respectively ( $P<0.001$ ). Diabetic ulcers costed the most among all types of complex wounds in this study, with a median per capita medical expense of 8,399.13 CNY (IQR: 3,435.24 to 16,267.55) followed by pressure ulcers (median: 8,039.12; IQR: 3,693.78 to 17,022.96) ( $P<0.001$ ).

[Insert Table 4 about here]

Table 5 shows the comorbidity of inpatients included in this study. People with complex wounds averagely have higher Charlson Index (more serious comorbidities) than people without at 1.87 compared with 0.82 ( $P <0.001$ ). People with diabetic ulcers have the most serious comorbidities (Charlson Index: 3.08), followed by people with pressure ulcers (Charlson Index: 2.38), as compared with people having other complex wounds or without any complex wounds.

[Insert Table 5 about here]

For patients with a complex wound which was not considered the main cause of hospitalization, *ceteris paribus*, the LOS was on average 47.7% ( $\exp(0.39)-1$ ) longer than the LOS for patients without complex wounds (first column of Table 6); the inpatient medical cost was also 60.0% ( $\exp(0.47)-1$ ) higher on average (second column of Table 6). Compared with patients without complex wounds, the presence of a complex wound was associated with increased LOS and increased costs. After controlling for severity of comorbidities and other confounders, we found people with non-healing surgical wounds alongside another main reason for hospital admission had the longest LOS and highest costs: with a LOS 155.7% ( $\exp(0.939)-1$ ) higher and inpatient cost 124.8% ( $\exp(0.81)-1$ ) greater compared with those without complex wounds or with other types of complex wounds (pressure ulcers, venous leg ulcers or other ulcers) (the third and fourth column of Table 6).

[Insert Table 6 about here]

## DISCUSSION

Complex wounds are a challenging public health problem.<sup>25</sup> In this study, we used three months of hospital discharge data from Sichuan province, China, and included all the healthcare institutions providing inpatient service in 2018. Our aim was to acquire more reliable estimates of the complex wound disease burden for inpatients. To identify patients with complex wounds more accurately, disease diagnosis and ICD-10 were used simultaneously.

This study discovered that the point prevalence of complex wounds among inpatients was 4.07 per 1,000, which is much higher than the earlier estimate from the 17 tertiary hospitals in China (1.69 per 1,000 inpatients).<sup>17</sup> Pressure ulcers were found to be the most common type of complex wound; similar to the result of an Irish study focusing on community care setting,<sup>26</sup> a two-week cross sectional survey in Leeds,<sup>1</sup> and Dutch study focusing on nursing homes.<sup>5</sup> Our point prevalence estimate of pressure ulcers among inpatients (1.47 per 1,000) is much lower than that of Indonesian inpatients (8.0%), and German inpatients (2.25%).<sup>27,28</sup> Assuming all patients with complex wounds got inpatient service from healthcare institutions, we have crudely estimated the point prevalence of complex wounds among community-based population in Sichuan (0.19 per 1,000). This rate is significantly lower than the estimates in previous studies which ranging from 0.04% to 1%.<sup>25</sup>

Many studies have previously shown that the prevalence of complex wounds is higher in older people<sup>1,4,29</sup>, and our point prevalence rates of most complex wounds (including pressure ulcers, diabetic and other ulcers) are consistent with the highest rates occurring in age 90+ age group. It is worth noting that the highest rates of venous leg ulcers and non-healing surgical wounds occurred in age 60-69 and 50-59 groups respectively. For non-healing surgical wounds, this may due to the preference of conservative treatment for elderly population in China. For venous leg ulcers, the reason of this point prevalence peak in this age group requires further investigation.

This study also found that females have lower rates of complex wounds in China than males, which is consistent with previous study conducted in China and Slovenia,<sup>4,16,17</sup> but different from the UK<sup>1,10</sup> – which showed that females are more likely to suffer from complex wounds.<sup>30</sup> The difference may be partially explained by differences in occupational and lifestyle activities with heavy labor and activities such as smoking being more common in older men than women of the same age. Due to rapidly improving working environments and other risk factor related activities there may be a shift in these gender differences for wound point prevalence over subsequent generations. .

This study found that where complex wounds was the major reason for hospital admission people had a significantly longer hospital LOS and higher medical costs than for all-cause admission in Sichuan. This is the first investigation of this kind in China. For patients who were admitted to health care institutions mainly for pressure ulcer, the LOS was longer than other complex wounds. Pressure ulcers often occur in people with limited mobility due to physical or cognitive impairment, and people with pressure ulcers were more likely to have serious co-morbidities. The relatively poor psychological, behavioral and cognitive status of these patients may prolong the treatment period. The longest LOS may also partially explain why the median of per capita medical expense for those admitted with a pressure ulcer is higher

1  
2  
3 than for people being admitted for most other types of complex wounds. Among all the  
4 complex wound types in this study, people with diabetes and one or more ulcers incurred the  
5 most medical costs with a median per capita medical expense of 8,399.13 CNY. Again these  
6 were people commonly effected by a range of other co-morbidities and who also required the  
7 use of blood glucose controlling drugs. Considering that the average yearly disposable income  
8 of Sichuan province is 20,580 CNY, this is a significant economic pressure to these patients.  
9 Median medical costs show similar trends, while differences between median and average costs  
10 likely reflects different basic costs of them. We also found that LOS and costs for people with  
11 complex wounds for whom this was not their principal diagnosis were higher when compared  
12 with patients without complex wounds. These data provide us a scope for further in-depth  
13 investigation and a hint for designing better prevention and financial support system for  
14 patients in China.  
15  
16  
17  
18  
19

### 20 **Strengths and limitations**

21 This geographically defined study is the first to report the prevalence of complex wounds in  
22 inpatients in China using data from all health care institutions providing inpatient services  
23 during the study period. It is also the first to quantify disease burden of complex wounds in  
24 China. Both disease code (ICD-10) and disease diagnosis were used to make sure that complex  
25 wounds were correctly identified and classified.  
26

27 This study also had some limitations. The estimates of prevalence may be underestimated.  
28 When estimating the prevalence of complex wounds for inpatients, this study was unable to  
29 identify the patients who may have had complex wounds that were not recorded in discharge  
30 records. This is also the case for patients with certain other illnesses or systematic problems,  
31 which may contribute to increased medical costs due to their links to the wounds. The point  
32 prevalence of complex wounds for the whole population in Sichuan does not capture the  
33 information of people who may have complex wounds but receive care at outpatient sectors  
34 or/and do not receive inpatient care during the study period but are “self-treating”. Further  
35 research in this area could pay attention to this under-studied population.  
36  
37  
38  
39  
40

### 41 **ACKNOWLEDGMENTS**

42 The authors are grateful to Health Information Centre of Sichuan Province for providing  
43 data. This study was funded by Sichuan Science and Technology Program (2019JDJQ0028).  
44  
45

### 46 **Contributors**

47 ZL and JP conceived the idea and design for this study; ZL and QL were responsible for data  
48 analysis; JP, JD and NC contributed to data analysis; QL created the original draft of this  
49 manuscript. All authors contributed to the interpretation of the findings, critical version of the  
50 manuscript.  
51  
52  
53

### 54 **Disclaimer**

55 The views expressed in this article are those of the authors, and not necessarily represent the  
56 those of the institution with which the authors are affiliated.  
57  
58

### 59 **Competing interest statement**

The authors declare that they have no competing financial interests.

### **Patient consent for publication**

Not required.

### **Patient and Public Involvement**

No patient involved.

### **Provenance and peer review**

Not commissioned; externally peer reviewed.

### **Data sharing statement**

All data relevant to the study are included in the article or uploaded as supplementary information.

### **Open access**

This is an open access article distributed in accordance with the Creative Commons Attribution-Non Commercial 4.0 International license (CC BY-NC 4.0), which permits others to distribute, remix, adapt, build upon this work non-commercially, and license their derivative works on different terms, provided the original work is properly cited, appropriate credit is given, any changes made indicated, and the use is non-commercial. See: <http://creativecommons.org/licenses/by-nc/4.0/>.

### **REFERENCE**

1. Hall J, Buckley HL, Lamb KA, et al. Point prevalence of complex wounds in a defined United Kingdom population: Point prevalence of complex wounds. *Wound Repair Regen.* 2014;22(6):694-700. doi:10.1111/wrr.12230
2. Jiang Y, Xia L, Jia L, Fu X. Survey of Wound-Healing Centers and Wound Care Units in China. *Int J Low Extrem Wounds.* 2016;15(3):274-279. doi:10.1177/1534734614568667
3. Han G, Ceilley R. Chronic Wound Healing: A Review of Current Management and Treatments. *Adv Ther.* 2017;34(3):599-610. doi:10.1007/s12325-017-0478-y
4. Paden L, Griffiths J, Cullum N. A cross-sectional survey of patients with open surgical wounds in Slovenia. *Health Soc Care Community.* December 2018:hsc.12700. doi:10.1111/hsc.12700
5. Rondas AA, Schols JM, Stobberingh EE, Halfens RJ. Prevalence of chronic wounds and structural quality indicators of chronic wound care in Dutch nursing homes. *Int Wound J.* 2015;12(6):630-635. doi:10.1111/iwj.12172
6. Lindholm C, Bergsten A, Berglund E. Chronic wounds and nursing care. *J Wound Care.* 1999;8(1):5-10. doi:10.12968/jowc.1999.8.1.25828
7. Viswanathan V. Epidemiology of Diabetic Foot and Management of Foot Problems in India. *Int J Low Extrem Wounds.* 2010;9(3):122-126. doi:10.1177/1534734610380026
8. Hansson C, Andersson E, Swanbeck G. A follow-up study of leg and foot ulcer patients. *Acta Derm Venereol.* 1987;67(6):496-500.
9. Gibbons GW, Orgill DP, Serena TE, et al. A Prospective, Randomized, Controlled Trial Comparing the Effects of Noncontact, Low-frequency Ultrasound to Standard Care in Healing Venous Leg Ulcers. *Ostomy Wound Manage.* 2015;61(1):16-29.
10. Gray TA, Rhodes S, Atkinson RA, et al. Opportunities for better value wound care: a

- multiservice, cross-sectional survey of complex wounds and their care in a UK community population. *BMJ Open*. 2018;8(3):e019440. doi:10.1136/bmjopen-2017-019440
11. Pokorná A, Leaper D. Assessment and documentation of non-healing, chronic wounds in inpatient health care facilities in the Czech Republic: an evaluation study. *Int Wound J*. 2015;12(2):224-231. doi:10.1111/iwj.12372
  12. Sen CK, Gordillo GM, Roy S, et al. Human skin wounds: A major and snowballing threat to public health and the economy. *Wound Repair Regen*. 2009;17(6):763-771. doi:10.1111/j.1524-475X.2009.00543.x
  13. Gottrup F. A specialized wound-healing center concept: importance of a multidisciplinary department structure and surgical treatment facilities in the treatment of chronic wounds. *Am J Surg*. 2004;187(5):S38-S43. doi:10.1016/S0002-9610(03)00303-9
  14. Rodrigues I, Mégie M-F. Prevalence of Chronic Wounds in Quebec Home Care: An Exploratory Study. *Ostomy Wound Manage*. 2006;52(5):46-57.
  15. Heyer K, Herberger K, Protz K, Glaeske G, Augustin M. Epidemiology of chronic wounds in Germany: Analysis of statutory health insurance data. *Wound Repair Regen*. 2016;24(2):434-442. doi:10.1111/wrr.12387
  16. Fu X, Sheng Z, Cherry GW, Li Q. Epidemiological study of chronic dermal ulcers in China. *Wound Repair Regen*. 1998;6(1):21-27. doi:10.1046/j.1524-475X.1998.60105.x
  17. Jiang Y, Huang S, Fu X, et al. Epidemiology of chronic cutaneous wounds in China: Epidemiology of chronic wounds in China. *Wound Repair Regen*. 2011;19(2):181-188. doi:10.1111/j.1524-475X.2010.00666.x
  18. Wang X, Yang H, Duan Z, Pan J. Spatial accessibility of primary health care in China: A case study in Sichuan Province. *Soc Sci Med*. 2018;209:14-24. doi:10.1016/j.socscimed.2018.05.023
  19. Keqiang L. Deepen health care reform continuously and promote the establishment of the health care system that suits China's national conditions and benefits all people. [http://www.gov.cn/ldhd/2011-11/17/content\\_1995480.htm](http://www.gov.cn/ldhd/2011-11/17/content_1995480.htm).
  20. Pan J, Shallcross D. Geographic distribution of hospital beds throughout China: a county-level econometric analysis. *Int J Equity Health*. 2016;15(1):179. doi:10.1186/s12939-016-0467-9
  21. Wang X, Pan J. Assessing the disparity in spatial access to hospital care in ethnic minority region in Sichuan Province, China. *BMC Health Serv Res*. 2016;16(1):399. doi:10.1186/s12913-016-1643-8
  22. Raetz JGM, Wick KH. Common Questions About Pressure Ulcers. *Am Fam Physician*. 2015;92(10):888-894.
  23. National Bureau of Statistics of China. National Data by Province. 2018. <http://data.stats.gov.cn/easyquery.htm?cn=E0103&zb=A030801&reg=510000&sj=2018>.
  24. Sundararajan V, Henderson T, Perry C, Muggivan A, Quan H, Ghali WA. New ICD-10 version of the Charlson comorbidity index predicted in-hospital mortality. *J Clin Epidemiol*. 2004;57(12):1288-1294. doi:10.1016/j.jclinepi.2004.03.012
  25. Martinengo L, Olsson M, Bajpai R, et al. Prevalence of chronic wounds in the general population: systematic review and meta-analysis of observational studies. *Ann Epidemiol*. 2019;29:8-15. doi:10.1016/j.annepidem.2018.10.005
  26. McDermott-Scales L, Cowman S, Gethin G. Prevalence of wounds in a community care setting in Ireland. *J Wound Care*. 2009;18(10):405-417.
  27. Amir Y, Lohrmann C, Halfens RJ, Schols JM. Pressure ulcers in four Indonesian hospitals: prevalence, patient characteristics, ulcer characteristics, prevention and treatment: Pressure ulcers in four Indonesian hospitals. *Int Wound J*. 2017;14(1):184-193. doi:10.1111/iwj.12580

- 1
  - 2
  - 3
  - 4
  - 5
  - 6
  - 7
  - 8
  - 9
  - 10
  - 11
  - 12
  - 13
  - 14
  - 15
  - 16
  - 17
  - 18
  - 19
  - 20
  - 21
  - 22
  - 23
  - 24
  - 25
  - 26
  - 27
  - 28
  - 29
  - 30
  - 31
  - 32
  - 33
  - 34
  - 35
  - 36
  - 37
  - 38
  - 39
  - 40
  - 41
  - 42
  - 43
  - 44
  - 45
  - 46
  - 47
  - 48
  - 49
  - 50
  - 51
  - 52
  - 53
  - 54
  - 55
  - 56
  - 57
  - 58
  - 59
  - 60
28. Kröger K, Niebel W, Maier I, Stausberg J, Gerber V, Schwarzkopf A. Prevalence of Pressure Ulcers in Hospitalized Patients in Germany in 2005: Data from the Federal Statistical Office. *Gerontology*. 2009;55(3):281-287. doi:10.1159/000174825
29. Wicke C, Bachinger A, Coerper S, Beckert S, Witte MB, Königsrainer A. Aging influences wound healing in patients with chronic lower extremity wounds treated in a specialized wound care center. *Wound Repair Regen*. 2009;17(1):25-33. doi:10.1111/j.1524-475X.2008.00438.x
30. Agale SV. Chronic Leg Ulcers: Epidemiology, Aetiopathogenesis, and Management. *Ulcers*. 2013;2013:1-9. doi:10.1155/2013/413604

For peer review only

**Table 1.** ICD-10 classification associated with complex wounds

| Wound types                | Identifying methods                                                                                                                                                                                                                                       |
|----------------------------|-----------------------------------------------------------------------------------------------------------------------------------------------------------------------------------------------------------------------------------------------------------|
| Pressure ulcer             | Code L89.-, excepting grade one pressure ulcer coded L89.000                                                                                                                                                                                              |
| Diabetic ulcer             | 1) code E10.504, E11.504, E14.501, E10.505, E11.505<br>2) code E11.502 with the corresponding diagnosis containing “gangrene”<br>3) E14.606, E11.601, E11.503, E10.503, BD54 excepting these whose Wagner classification is level zero.<br>1) or 2) or 3) |
| Venous leg ulcer           | Code I83.0-, I83.2-                                                                                                                                                                                                                                       |
| Non-healing surgical wound | 1) code T81.3-<br>2) code T81.4- excepting biliary tract infection after surgery coded T81.404<br>3) code T81.8- excepting abdominal pain after surgery<br>1) or 2) or 3)                                                                                 |
| Other ulcer                | Code L97.-, L98.4-, R02, T87.4-, T87.5-                                                                                                                                                                                                                   |



**Table 2.** Wounds point prevalence estimates by wounds type

| Wounds type                                                       | Frequency | Point prevalence<br>per 1,000 | 95% CI       |
|-------------------------------------------------------------------|-----------|-------------------------------|--------------|
| <i>Inpatient point prevalence<sup>a</sup></i>                     |           |                               |              |
| All Wounds                                                        | 16,426    | 4.07                          | (4.01, 4.13) |
| Pressure ulcers                                                   | 5,915     | 1.47                          | (1.43, 1.50) |
| Diabetic ulcers                                                   | 3,269     | 0.81                          | (0.78, 0.84) |
| Venous leg ulcers                                                 | 1,139     | 0.28                          | (0.27, 0.30) |
| Non-healing surgical wounds                                       | 4,090     | 1.01                          | (0.98, 1.05) |
| Other ulcer                                                       | 2,013     | 0.50                          | (0.48, 0.52) |
| <i>Point prevalence in community-based population<sup>b</sup></i> |           |                               |              |
| All Wounds                                                        | 16,086    | 0.19                          | (0.19, 0.20) |
| Pressure ulcers                                                   | 5,842     | 0.07                          | (0.07, 0.07) |
| Diabetic ulcers                                                   | 3,230     | 0.04                          | (0.04, 0.04) |
| Venous leg ulcers                                                 | 1,116     | 0.01                          | (0.01, 0.01) |
| Non-healing surgical wounds                                       | 3,936     | 0.05                          | (0.05, 0.05) |
| Other ulcers                                                      | 1,962     | 0.02                          | (0.02, 0.03) |

<sup>a</sup>. Using the total number of inpatient in Sichuan province during the fourth quarter of calendar year 2018 as denominator.

<sup>b</sup>. Using inpatients who were living in Sichuan at present and have at least one wounds we defined as the numerator and the population of Sichuan in 2018 as the denominator.

**Table 3.** Inpatient wounds point prevalence estimates by demographic characteristics

| Variable                     | Patients with wounds | Total patients | Point prevalence per 1,000 <sup>a</sup> | 95% CI         |
|------------------------------|----------------------|----------------|-----------------------------------------|----------------|
| <i>Age group<sup>b</sup></i> |                      |                |                                         |                |
| 0-9                          | 95                   | 423,706        | 0.22                                    | (0.18, 0.27)   |
| 10-19                        | 171                  | 98,270         | 1.74                                    | (1.50, 2.02)   |
| 20-29                        | 462                  | 293,458        | 1.57                                    | (1.44, 1.72)   |
| 30-39                        | 584                  | 281,722        | 2.07                                    | (1.91, 2.25)   |
| 40-49                        | 1,569                | 480,648        | 3.26                                    | (3.12, 3.43)   |
| 50-59                        | 2,489                | 571,865        | 4.35                                    | (4.19, 4.53)   |
| 60-69                        | 3,763                | 835,686        | 4.50                                    | (4.36, 4.65)   |
| 70-79                        | 3,885                | 715,667        | 5.43                                    | (5.26, 5.60)   |
| 80-89                        | 2,825                | 299,432        | 9.44                                    | (9.10, 9.79)   |
| 90+                          | 583                  | 33,309         | 17.50                                   | (16.15, 18.97) |
| <i>Gender</i>                |                      |                |                                         |                |
| Male                         | 9,676                | 1,916,399      | 5.05                                    | (4.95, 5.15)   |
| Female                       | 6,746                | 2,114,331      | 3.19                                    | (3.12, 3.27)   |
| Missing                      | 4                    | 3,033          | 1.32                                    | (0.51, 3.39)   |
| <i>Ethnic Group</i>          |                      |                |                                         |                |
| Minority                     | 471                  | 206,921        | 2.28                                    | (2.08, 2.49)   |
| Han                          | 15,955               | 3,826,844      | 4.17                                    | (4.11, 4.23)   |
| <i>Occupation</i>            |                      |                |                                         |                |
| Civil servants & active army | 88                   | 20,341         | 4.33                                    | (3.51, 5.33)   |
| Professionals & technical    | 96                   | 33,195         | 2.89                                    | (2.37, 3.53)   |
| Office clerk & manager       | 347                  | 103,284        | 3.36                                    | (3.03, 3.73)   |
| Worker                       | 356                  | 82,198         | 4.33                                    | (3.91, 4.80)   |
| Agricultural labourer        | 6,284                | 1,816,499      | 3.46                                    | (3.38, 3.55)   |
| Student                      | 133                  | 103,659        | 1.28                                    | (1.08, 1.52)   |
| Freelancer                   | 427                  | 98,469         | 4.34                                    | (3.95, 4.77)   |
| Self-employed                | 63                   | 19,021         | 3.31                                    | (2.59, 4.24)   |
| Unemployed                   | 491                  | 124,972        | 3.93                                    | (3.60, 4.29)   |
| Retired                      | 1,934                | 188,829        | 10.24                                   | (9.80, 10.71)  |
| Others                       | 6,207                | 1,443,296      | 4.30                                    | (4.20, 4.41)   |

<sup>a</sup>. Using the total number of inpatient people in Sichuan province during the fourth quarter of calendar year 2018.

<sup>b</sup>. Continuous variable was transferred to 10-year age categories manually.

**Table 4.** Disease burden of complex wounds

| Wounds type                 | Frequency <sup>a</sup> | LOS (days) <sup>b</sup> |               | Per capita inpatient cost (CNY) <sup>b</sup> |                                   |
|-----------------------------|------------------------|-------------------------|---------------|----------------------------------------------|-----------------------------------|
|                             |                        | Mean± SD                | Median (IQR)  | Mean± SD                                     | Median (IQR)                      |
| All wounds                  | 5,048                  | 18± 22                  | 12<br>(7; 22) | 11,347.54± 16,715.62                         | 6,500.18<br>(2,965.92; 1,2975.23) |
| Pressure ulcers             | 583                    | 31± 41                  | 20<br>(9; 34) | 15,852.69± 23,630.01                         | 8,039.12<br>(3,693.78; 17,022.99) |
| Diabetic ulcers             | 843                    | 18± 23                  | 13<br>(7; 22) | 13,528.74± 17,966.84                         | 8,399.13<br>(3,435.24; 16,267.55) |
| Venous leg ulcers           | 903                    | 12± 8                   | 9<br>(7; 14)  | 8,865.53± 6,866.72                           | 7,496.02<br>(4,063.37; 11,388.46) |
| Non-healing surgical wounds | 1,639                  | 16± 17                  | 11<br>(7; 20) | 10,071.35± 15,240.53                         | 4,954.22<br>(2,316.53; 10,774.30) |
| Other ulcers                | 1,080                  | 18± 19                  | 13<br>(7; 24) | 11,225.03± 18,425.64                         | 6,152.69<br>(3,011.88; 13,719.34) |

<sup>a</sup> Only patient whose principal cause of hospitalization was the complex wound were included in this table.

<sup>b</sup> mean with standard deviation (SD) and median with inter-quantile range (IQR) were presented.

**Table 5.** Comorbidities of people with complex wounds

| Group                           | Charlson Index |              |
|---------------------------------|----------------|--------------|
|                                 | Mean±SD        | Median (IQR) |
| Patients without complex wounds | 0.82±1.29      | 0 (0;1)      |
| Patients with complex wounds    | 1.87±1.93      | 1 (0;3)      |
| Pressure ulcers                 | 2.38±1.86      | 2 (1;3)      |
| Diabetic ulcers                 | 3.08±1.97      | 3 (1;4)      |
| Venous leg ulcers               | 0.51±1.03      | 0 (0;1)      |
| Non-healing surgical wounds     | 0.91±1.46      | 0 (0;2)      |
| Other ulcers                    | 1.17±1.58      | 1 (0;2)      |

For peer review only

**Table 6.** Two-level hierarchical model results

| <i>Explaining variables</i>                             | <i>Dependent variable</i> |                   |                   |                   |
|---------------------------------------------------------|---------------------------|-------------------|-------------------|-------------------|
|                                                         | log(LOS)                  | log(expense)      | log(LOS)          | log(expense)      |
|                                                         | (1)                       | (2)               | (3)               | (4)               |
| Complex wounds ( <i>vs NO</i> )                         | 0.39***<br>(0.01)         | 0.47***<br>(0.01) |                   |                   |
| <i>Wounds type (vs patients without complex wounds)</i> |                           |                   |                   |                   |
| Pressure ulcers                                         |                           |                   | 0.23***<br>(0.01) | 0.48***<br>(0.01) |
| Diabetic ulcers                                         |                           |                   | 0.18***<br>(0.01) | 0.19***<br>(0.01) |
| Venous leg ulcers                                       |                           |                   | 0.27***<br>(0.04) | 0.14**<br>(0.04)  |
| Non-healing surgical wounds                             |                           |                   | 0.94***<br>(0.01) | 0.81***<br>(0.01) |
| Other ulcers                                            |                           |                   | 0.38***<br>(0.02) | 0.33***<br>(0.02) |
| Observations <sup>a</sup>                               | 4,021,677                 | 4,021,677         | 4,021,677         | 4,021,677         |

*Note:* Cells contain coefficient (and standard error). \*p <0.05, \*\*p<0.01, \*\*\*p<0.001. All models had adjusted for patient's age (continuous, years), gender (male, female or missing), occupation (11 categories: Civil Servants & active army, professionals & technical, office clerk & manager, worker, agricultural labourer, student, freelancer, self-employed, unemployed, retired, others), social insurance program (four categories: Urban Employee Basic Medical Insurance, Urban Resident Basic Medical Insurance, New Rural Cooperative System), whether or not surgery was required (yes or no), Charlson Index (continuous, adjusting for comorbidity), health care institution level (six categories: primary hospitals, secondary hospitals, tertiary hospitals, unassigned hospitals, primary health care sectors, other providers) and ownership type (public or private). The full results were displayed in table A2 in appendix.

a. Only patients whose principal cause of hospitalization was not complex wound were selected to fit the two-level hierarchical models.

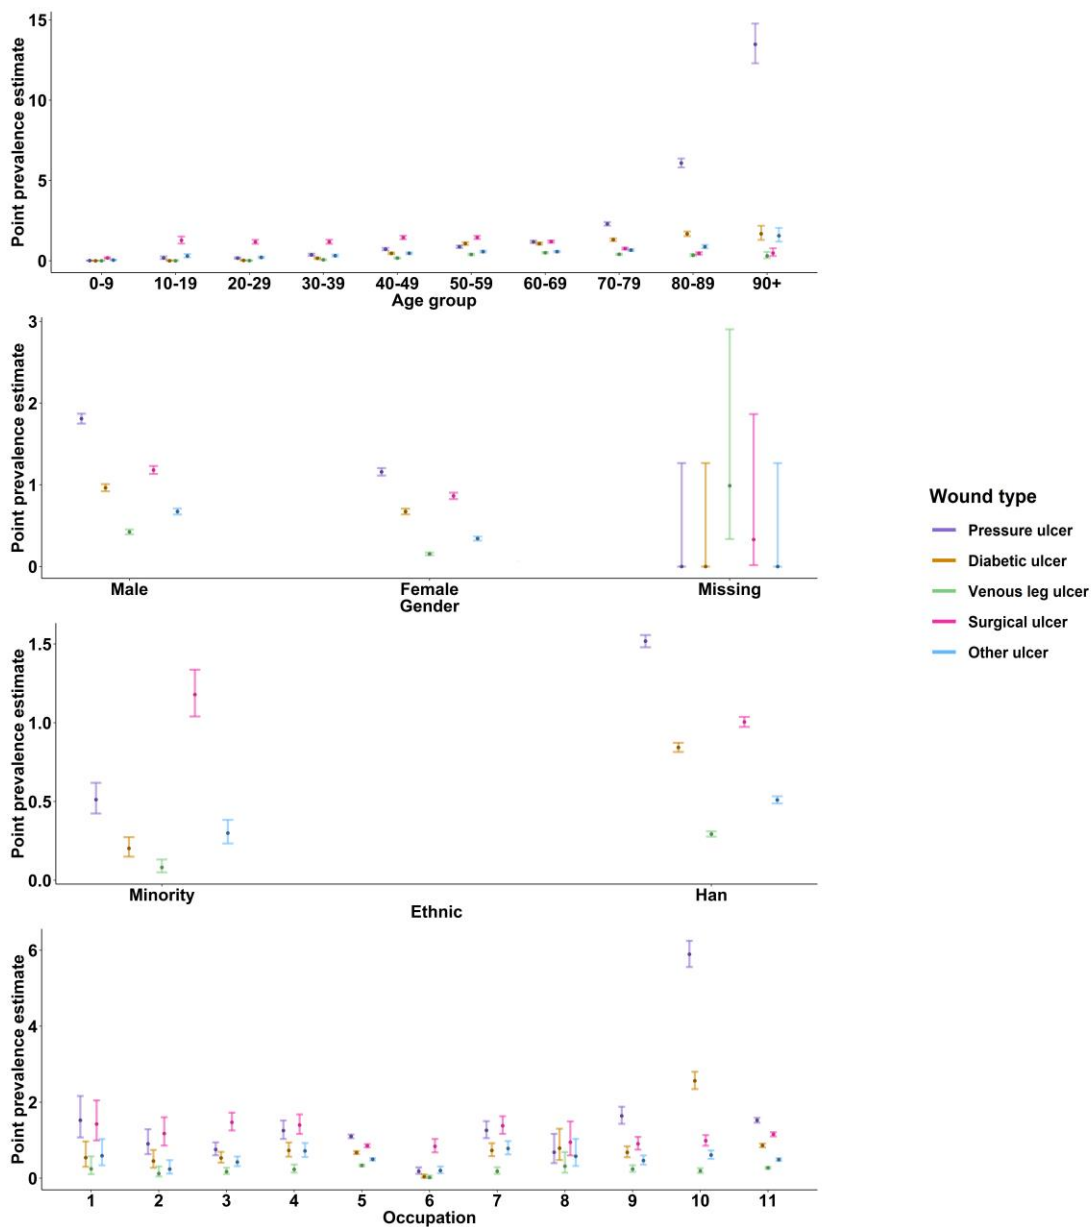

**Figure 1.** Inpatient wounds point prevalence estimates by wound types and demographic characteristics

*Note:* Point estimates with 95% confidence intervals were displayed in this figure. Occupation 1: Civil Servants and active army; 2: Professionals and technical; 3: Office clerk and manager; 4: Worker; 5: Farmer; 6: Student; 7: Freelancer; 8: Self-employed; 9: Unemployed; 10: Retired; 11: Others. Exact data was showed in table A1 in appendix.

## APPENDIX

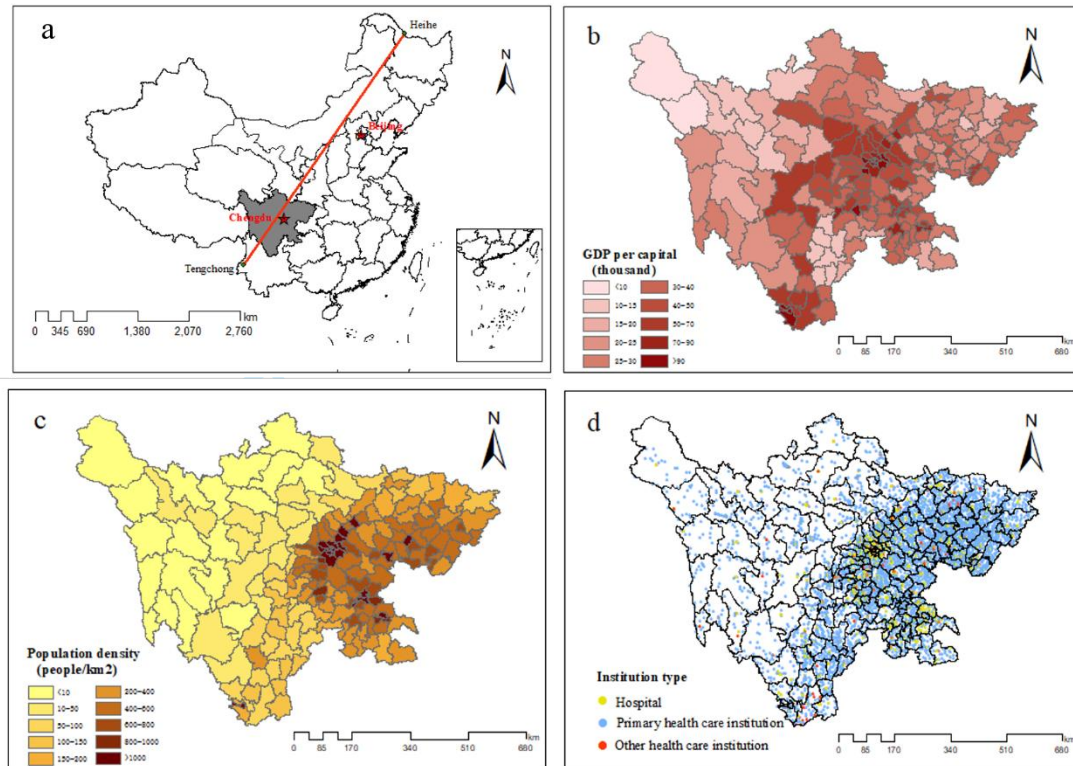

**Table A1.** Ghost table for discharge data**Home page of inpatient record**

Year \_\_\_\_\_

Name of Hospital \_\_\_\_\_ (Organization code: □□□□□□□□ - □)

Number of Health Card:

Hospitalization count:

Patient's identification number:

| <b>Name</b> _____ <b>Gender</b> <input type="checkbox"/> 1.M 2. F <b>Birthday</b> _____ <b>Age</b> _____<br><b>Nationality</b> _____ <b>Neonatal birth weight</b> _____ g <b>Neonatal admission weight</b> _____ g<br><b>Birthplace</b> _____ <b>Native place</b> _____ <b>Ethnic group</b> _____<br><b>ID number</b> _____ <b>Occupation</b> _____ <b>Marital status</b> _____<br><b>Present address</b> _____ <b>Tel</b> _____ <b>Post code</b> _____<br><b>Registered address</b> _____ <b>Post code</b> _____<br><b>Work address</b> _____ <b>Office Tel</b> _____ <b>Post code</b> _____<br><b>Contact person</b> _____ <b>Relationship</b> _____ <b>Address</b> _____ <b>Tel</b> _____<br><b>Admission type</b> <input type="checkbox"/> 1. emergency 2. outpatient clinic<br>3. Referred from other institutions and its name is _____ 9. others<br><b>Admission time</b> _____ year _____ month _____ day _____ hour _____ minute<br><b>Hospital department</b> _____ <b>Inpatient ward number</b> _____ <b>The department the patient transferred to is</b> _____<br><b>Discharge time</b> _____ year _____ month _____ day _____ hour _____ minute<br><b>Diagnosis in outpatient (emergency) department</b> _____ <b>ICD-10</b> _____<br><b>Health status at admission</b> <input type="checkbox"/> 1. critically ill 2. acute 3. ordinary<br><b>Diagnosis at admission</b> _____ <b>ICD-10</b> _____ <b>Date of making the principal diagnosis</b> _____<br><b>Whether the patient was critically ill during hospitalization</b> <input type="checkbox"/> 1.yes 2.no |        |                                                                  |                                   |
|---------------------------------------------------------------------------------------------------------------------------------------------------------------------------------------------------------------------------------------------------------------------------------------------------------------------------------------------------------------------------------------------------------------------------------------------------------------------------------------------------------------------------------------------------------------------------------------------------------------------------------------------------------------------------------------------------------------------------------------------------------------------------------------------------------------------------------------------------------------------------------------------------------------------------------------------------------------------------------------------------------------------------------------------------------------------------------------------------------------------------------------------------------------------------------------------------------------------------------------------------------------------------------------------------------------------------------------------------------------------------------------------------------------------------------------------------------------------------------------------------------------------------------------------------------------------------------|--------|------------------------------------------------------------------|-----------------------------------|
| Diagnosis on Discharge                                                                                                                                                                                                                                                                                                                                                                                                                                                                                                                                                                                                                                                                                                                                                                                                                                                                                                                                                                                                                                                                                                                                                                                                                                                                                                                                                                                                                                                                                                                                                          | ICD-10 | Disease status at admission (DSA)                                | Disease status on discharge (DSD) |
| Principal diagnosis:                                                                                                                                                                                                                                                                                                                                                                                                                                                                                                                                                                                                                                                                                                                                                                                                                                                                                                                                                                                                                                                                                                                                                                                                                                                                                                                                                                                                                                                                                                                                                            |        |                                                                  |                                   |
| Other diagnosis:                                                                                                                                                                                                                                                                                                                                                                                                                                                                                                                                                                                                                                                                                                                                                                                                                                                                                                                                                                                                                                                                                                                                                                                                                                                                                                                                                                                                                                                                                                                                                                |        |                                                                  |                                   |
|                                                                                                                                                                                                                                                                                                                                                                                                                                                                                                                                                                                                                                                                                                                                                                                                                                                                                                                                                                                                                                                                                                                                                                                                                                                                                                                                                                                                                                                                                                                                                                                 |        |                                                                  |                                   |
|                                                                                                                                                                                                                                                                                                                                                                                                                                                                                                                                                                                                                                                                                                                                                                                                                                                                                                                                                                                                                                                                                                                                                                                                                                                                                                                                                                                                                                                                                                                                                                                 |        |                                                                  |                                   |
|                                                                                                                                                                                                                                                                                                                                                                                                                                                                                                                                                                                                                                                                                                                                                                                                                                                                                                                                                                                                                                                                                                                                                                                                                                                                                                                                                                                                                                                                                                                                                                                 |        |                                                                  |                                   |
|                                                                                                                                                                                                                                                                                                                                                                                                                                                                                                                                                                                                                                                                                                                                                                                                                                                                                                                                                                                                                                                                                                                                                                                                                                                                                                                                                                                                                                                                                                                                                                                 |        |                                                                  |                                   |
|                                                                                                                                                                                                                                                                                                                                                                                                                                                                                                                                                                                                                                                                                                                                                                                                                                                                                                                                                                                                                                                                                                                                                                                                                                                                                                                                                                                                                                                                                                                                                                                 |        |                                                                  |                                   |
|                                                                                                                                                                                                                                                                                                                                                                                                                                                                                                                                                                                                                                                                                                                                                                                                                                                                                                                                                                                                                                                                                                                                                                                                                                                                                                                                                                                                                                                                                                                                                                                 |        |                                                                  |                                   |
|                                                                                                                                                                                                                                                                                                                                                                                                                                                                                                                                                                                                                                                                                                                                                                                                                                                                                                                                                                                                                                                                                                                                                                                                                                                                                                                                                                                                                                                                                                                                                                                 |        |                                                                  |                                   |
|                                                                                                                                                                                                                                                                                                                                                                                                                                                                                                                                                                                                                                                                                                                                                                                                                                                                                                                                                                                                                                                                                                                                                                                                                                                                                                                                                                                                                                                                                                                                                                                 |        |                                                                  |                                   |
| <b>DSA:</b> 1.yes 2.clinically undetermined 3.unclear 4.no                                                                                                                                                                                                                                                                                                                                                                                                                                                                                                                                                                                                                                                                                                                                                                                                                                                                                                                                                                                                                                                                                                                                                                                                                                                                                                                                                                                                                                                                                                                      |        | <b>DSD:</b> 1.cured 2.improved 3.not cured 4.deceased 5.others   |                                   |
| <b>Cause of injury/poisoning</b> _____                                                                                                                                                                                                                                                                                                                                                                                                                                                                                                                                                                                                                                                                                                                                                                                                                                                                                                                                                                                                                                                                                                                                                                                                                                                                                                                                                                                                                                                                                                                                          |        | <b>ICD-10</b> _____                                              |                                   |
| <b>pathological diagnosis:</b> _____                                                                                                                                                                                                                                                                                                                                                                                                                                                                                                                                                                                                                                                                                                                                                                                                                                                                                                                                                                                                                                                                                                                                                                                                                                                                                                                                                                                                                                                                                                                                            |        | <b>ICD-10</b> _____ <b>Pathological examination number</b> _____ |                                   |
| <b>TNM stage:</b> <input type="checkbox"/> 1.I 2.II 3.III 4.IV                                                                                                                                                                                                                                                                                                                                                                                                                                                                                                                                                                                                                                                                                                                                                                                                                                                                                                                                                                                                                                                                                                                                                                                                                                                                                                                                                                                                                                                                                                                  |        |                                                                  |                                   |
| <b>drug allergy</b> <input type="checkbox"/> 1.no 2.yes, and the allergic drug is: _____ <b>Autopsy of deceased patient</b> <input type="checkbox"/> 1.yes 2.no                                                                                                                                                                                                                                                                                                                                                                                                                                                                                                                                                                                                                                                                                                                                                                                                                                                                                                                                                                                                                                                                                                                                                                                                                                                                                                                                                                                                                 |        |                                                                  |                                   |
| <b>Blood type</b> <input type="checkbox"/> 1. A 2.B 3.O 4.AB 5.unclear 6. unchecked                                                                                                                                                                                                                                                                                                                                                                                                                                                                                                                                                                                                                                                                                                                                                                                                                                                                                                                                                                                                                                                                                                                                                                                                                                                                                                                                                                                                                                                                                             |        |                                                                  |                                   |
| <b>Rh</b> <input type="checkbox"/> 1. negative 2. positive 3. unclear 4. unchecked                                                                                                                                                                                                                                                                                                                                                                                                                                                                                                                                                                                                                                                                                                                                                                                                                                                                                                                                                                                                                                                                                                                                                                                                                                                                                                                                                                                                                                                                                              |        |                                                                  |                                   |
| <b>Follow up clinic</b> <input type="checkbox"/> 1.yes 2.no                                                                                                                                                                                                                                                                                                                                                                                                                                                                                                                                                                                                                                                                                                                                                                                                                                                                                                                                                                                                                                                                                                                                                                                                                                                                                                                                                                                                                                                                                                                     |        | <b>Follow-up period</b> _____                                    |                                   |



1  
2  
3  
4  
5  
6  
7  
8  
9  
10  
11  
12  
13  
14  
15  
16  
17  
18  
19  
20  
21  
22  
23  
24  
25  
26  
27  
28  
29  
30  
31  
32  
33  
34  
35  
36  
37  
38  
39  
40  
41  
42  
43  
44  
45  
46  
47  
48  
49  
50  
51  
52  
53  
54  
55  
56  
57  
58  
59  
60

| Section director's name _____ Chief doctor _____ Attending doctor _____ Visiting staff _____<br>Resident doctor _____ Primary nurse _____ Refresher doctor _____ Intern _____ coder _____                                                                                                                                                                                                                                                                                                                                                                                                                                                                                                                                                                                                                                                                                                                                                                                                                                                                                                                                                                                                                                                                                                                                                                                                                                                                                                                   |      |       |                       |                  |                                                                       |              |                     |            |                   |
|-------------------------------------------------------------------------------------------------------------------------------------------------------------------------------------------------------------------------------------------------------------------------------------------------------------------------------------------------------------------------------------------------------------------------------------------------------------------------------------------------------------------------------------------------------------------------------------------------------------------------------------------------------------------------------------------------------------------------------------------------------------------------------------------------------------------------------------------------------------------------------------------------------------------------------------------------------------------------------------------------------------------------------------------------------------------------------------------------------------------------------------------------------------------------------------------------------------------------------------------------------------------------------------------------------------------------------------------------------------------------------------------------------------------------------------------------------------------------------------------------------------|------|-------|-----------------------|------------------|-----------------------------------------------------------------------|--------------|---------------------|------------|-------------------|
| The quality of medical record <input type="checkbox"/> 1. high 2. medium 3. low<br>Quality control nurses _____                                                                                                                                                                                                                                                                                                                                                                                                                                                                                                                                                                                                                                                                                                                                                                                                                                                                                                                                                                                                                                                                                                                                                                                                                                                                                                                                                                                             |      |       |                       |                  | Quality control doctors _____<br>Date of making quality control _____ |              |                     |            |                   |
| Prophylactic use of antimicrobial drugs for primary surgical incision <input type="checkbox"/> 1. yes 2. no<br>Duration(hours): _____ Drug combination <input type="checkbox"/> 1. yes 2. no                                                                                                                                                                                                                                                                                                                                                                                                                                                                                                                                                                                                                                                                                                                                                                                                                                                                                                                                                                                                                                                                                                                                                                                                                                                                                                                |      |       |                       |                  |                                                                       |              |                     |            |                   |
| Surgery code                                                                                                                                                                                                                                                                                                                                                                                                                                                                                                                                                                                                                                                                                                                                                                                                                                                                                                                                                                                                                                                                                                                                                                                                                                                                                                                                                                                                                                                                                                | time | level | Name of the operation | Operating Doctor |                                                                       |              | Wound healing grade | anesthesia | Anesthesiologists |
|                                                                                                                                                                                                                                                                                                                                                                                                                                                                                                                                                                                                                                                                                                                                                                                                                                                                                                                                                                                                                                                                                                                                                                                                                                                                                                                                                                                                                                                                                                             |      |       |                       | Operator         | Assistant 1                                                           | Assistant II |                     |            |                   |
|                                                                                                                                                                                                                                                                                                                                                                                                                                                                                                                                                                                                                                                                                                                                                                                                                                                                                                                                                                                                                                                                                                                                                                                                                                                                                                                                                                                                                                                                                                             |      |       |                       |                  |                                                                       |              | /                   |            |                   |
|                                                                                                                                                                                                                                                                                                                                                                                                                                                                                                                                                                                                                                                                                                                                                                                                                                                                                                                                                                                                                                                                                                                                                                                                                                                                                                                                                                                                                                                                                                             |      |       |                       |                  |                                                                       |              | /                   |            |                   |
|                                                                                                                                                                                                                                                                                                                                                                                                                                                                                                                                                                                                                                                                                                                                                                                                                                                                                                                                                                                                                                                                                                                                                                                                                                                                                                                                                                                                                                                                                                             |      |       |                       |                  |                                                                       |              | /                   |            |                   |
|                                                                                                                                                                                                                                                                                                                                                                                                                                                                                                                                                                                                                                                                                                                                                                                                                                                                                                                                                                                                                                                                                                                                                                                                                                                                                                                                                                                                                                                                                                             |      |       |                       |                  |                                                                       |              | /                   |            |                   |
|                                                                                                                                                                                                                                                                                                                                                                                                                                                                                                                                                                                                                                                                                                                                                                                                                                                                                                                                                                                                                                                                                                                                                                                                                                                                                                                                                                                                                                                                                                             |      |       |                       |                  |                                                                       |              | /                   |            |                   |
|                                                                                                                                                                                                                                                                                                                                                                                                                                                                                                                                                                                                                                                                                                                                                                                                                                                                                                                                                                                                                                                                                                                                                                                                                                                                                                                                                                                                                                                                                                             |      |       |                       |                  |                                                                       |              | /                   |            |                   |
|                                                                                                                                                                                                                                                                                                                                                                                                                                                                                                                                                                                                                                                                                                                                                                                                                                                                                                                                                                                                                                                                                                                                                                                                                                                                                                                                                                                                                                                                                                             |      |       |                       |                  |                                                                       |              | /                   |            |                   |
|                                                                                                                                                                                                                                                                                                                                                                                                                                                                                                                                                                                                                                                                                                                                                                                                                                                                                                                                                                                                                                                                                                                                                                                                                                                                                                                                                                                                                                                                                                             |      |       |                       |                  |                                                                       |              | /                   |            |                   |
|                                                                                                                                                                                                                                                                                                                                                                                                                                                                                                                                                                                                                                                                                                                                                                                                                                                                                                                                                                                                                                                                                                                                                                                                                                                                                                                                                                                                                                                                                                             |      |       |                       |                  |                                                                       |              | /                   |            |                   |
| Clinical pathway management <input type="checkbox"/> 1. yes 2. no Complete clinical pathway <input type="checkbox"/> 1. yes 2. no, and the reason is _____<br>Variation <input type="checkbox"/> 1. yes 2. no; the reason is: _____                                                                                                                                                                                                                                                                                                                                                                                                                                                                                                                                                                                                                                                                                                                                                                                                                                                                                                                                                                                                                                                                                                                                                                                                                                                                         |      |       |                       |                  |                                                                       |              |                     |            |                   |
| <b>Discharge type</b> <input type="checkbox"/><br>1. Discharge on doctor's orders<br>2. Be referred to a superior hospital, and its name is _____<br>3. Be referred to primary health institution (THC/CHC), and its name is _____<br>4. Leave hospital without medical advice 5. dead 9. others                                                                                                                                                                                                                                                                                                                                                                                                                                                                                                                                                                                                                                                                                                                                                                                                                                                                                                                                                                                                                                                                                                                                                                                                            |      |       |                       |                  |                                                                       |              |                     |            |                   |
| <b>Does she/he has the plan to be readmitted within 31 days</b> <input type="checkbox"/> 1. no 2. yes, and the reason is _____                                                                                                                                                                                                                                                                                                                                                                                                                                                                                                                                                                                                                                                                                                                                                                                                                                                                                                                                                                                                                                                                                                                                                                                                                                                                                                                                                                              |      |       |                       |                  |                                                                       |              |                     |            |                   |
| <b>How long did the craniocerebral injury patient remain in a coma:</b><br>Before admission, she/he was in coma for _____ minutes<br>After admission, she/he was in coma for _____ minutes                                                                                                                                                                                                                                                                                                                                                                                                                                                                                                                                                                                                                                                                                                                                                                                                                                                                                                                                                                                                                                                                                                                                                                                                                                                                                                                  |      |       |                       |                  |                                                                       |              |                     |            |                   |
| <b>Whether the patient was readmitted for the same disease</b> <input type="checkbox"/> 1. yes 2. no<br><b>How long has it been since the last discharge?</b> _____ days                                                                                                                                                                                                                                                                                                                                                                                                                                                                                                                                                                                                                                                                                                                                                                                                                                                                                                                                                                                                                                                                                                                                                                                                                                                                                                                                    |      |       |                       |                  |                                                                       |              |                     |            |                   |
| <b>Inpatient expense (yuan):</b> Total expense _____ (out-of-pocket payment: _____ others: _____)<br><b>1. Comprehensive medical services:</b><br>(1) General medical service expense: _____ (2) General treatment expense: _____<br>(3) Nursing expense: _____ (4) Other expense: _____<br><b>2. Diagnosis:</b> (5) Pathological diagnosis: _____ (6) laboratory diagnosis: _____<br>(7) Imaging diagnosis: _____ (8) Clinical diagnosis: _____<br><b>3. Treatment:</b> (9) Non-surgical treatment: _____ (Clinical physiotherapy: _____)<br>(10) Surgical treatment expense: _____ (Anesthetic expense: _____ Operation: _____)<br><b>4. Recovery:</b> (11) Recovery expense: _____<br><b>5. Traditional Chinese treatment:</b> (12) Traditional Chinese treatment expense: _____<br><b>6. Western medicine:</b> (13) Western medicine expense: _____ (Antimicrobial expense: _____)<br><b>7. Traditional Chinese medicine (TCM):</b><br>(14) Proprietary Chinese medicine expense _____ (15) Chinese herbal medicine expense: _____<br><b>8. Blood and blood products:</b> (16) Blood expense: _____ (17) Albumin products: _____<br>(18) Globulin products: _____ (19) Hemagglutinin sub products: _____ (20) Subclass of cytokines: _____<br><b>9. Consumable materials:</b> (21) Disposable medical materials for inspection: _____<br>(22) Disposable medical materials for treatment: _____<br>(23) Disposable medical materials for surgery: _____<br><b>10. Others:</b> (24) Other expense: _____ |      |       |                       |                  |                                                                       |              |                     |            |                   |

**Table A2.** Full results of two-level hierarchical models

| <i>Explaining variables</i>                                          | <i>Dependent variable</i> |              |           |              |
|----------------------------------------------------------------------|---------------------------|--------------|-----------|--------------|
|                                                                      | log(LOS)                  | log(expense) | log(LOS)  | log(expense) |
|                                                                      | (1)                       | (2)          | (3)       | (4)          |
| Wounds                                                               | 0.390***                  | 0.472***     |           |              |
|                                                                      | (0.006)                   | (0.006)      |           |              |
| <i>Wounds type (vs patients without complex wounds)</i>              |                           |              |           |              |
| Pressure ulcers                                                      |                           |              | 0.233***  | 0.484***     |
|                                                                      |                           |              | (0.009)   | (0.009)      |
| Diabetic ulcers                                                      |                           |              | 0.183***  | 0.194***     |
|                                                                      |                           |              | (0.014)   | (0.013)      |
| Venous leg ulcers                                                    |                           |              | 0.268***  | 0.137**      |
|                                                                      |                           |              | (0.044)   | (0.042)      |
| Non-healing surgical wounds                                          |                           |              | 0.939***  | 0.807***     |
|                                                                      |                           |              | (0.013)   | (0.013)      |
| Other ulcers                                                         |                           |              | 0.380***  | 0.333***     |
|                                                                      |                           |              | (0.020)   | (0.019)      |
| Age (year)                                                           | 0.003***                  | 0.008***     | 0.003***  | 0.008***     |
|                                                                      | (0.00002)                 | (0.00002)    | (0.00002) | (0.00002)    |
| <i>Gender (vs male)</i>                                              |                           |              |           |              |
| Female                                                               | -0.061***                 | -0.056***    | -0.061*** | -0.056***    |
|                                                                      | (0.001)                   | (0.001)      | (0.001)   | (0.001)      |
| Missing                                                              | -0.055***                 | -0.061***    | -0.055*** | -0.061***    |
|                                                                      | (0.015)                   | (0.014)      | (0.015)   | (0.014)      |
| Charlson Index                                                       | 0.075***                  | 0.116***     | 0.075***  | 0.116***     |
|                                                                      | (0.0003)                  | (0.0003)     | (0.0003)  | (0.0003)     |
| <i>Social insurance program (vs UEBMI) <sup>a</sup></i>              |                           |              |           |              |
| URBMI                                                                | -0.059***                 | -0.036***    | -0.059*** | -0.036***    |
|                                                                      | (0.001)                   | (0.001)      | (0.001)   | (0.001)      |
| NRCMS                                                                | -0.078***                 | -0.036***    | -0.078*** | -0.036***    |
|                                                                      | (0.002)                   | (0.002)      | (0.002)   | (0.002)      |
| Others                                                               | -0.127***                 | -0.078***    | -0.127*** | -0.078***    |
|                                                                      | (0.001)                   | (0.001)      | (0.001)   | (0.001)      |
| <i>Occupation (vs Civil Servants &amp; active army) <sup>b</sup></i> |                           |              |           |              |
| Professionals & technical                                            | -0.055***                 | -0.031***    | -0.055*** | -0.031***    |
|                                                                      | (0.006)                   | (0.006)      | (0.006)   | (0.006)      |

|    |                                                             |           |           |           |           |  |
|----|-------------------------------------------------------------|-----------|-----------|-----------|-----------|--|
| 1  |                                                             |           |           |           |           |  |
| 2  |                                                             |           |           |           |           |  |
| 3  |                                                             |           |           |           |           |  |
| 4  | Office clerk & manager                                      | -0.057*** | -0.024*** | -0.057*** | -0.024*** |  |
| 5  |                                                             | (0.005)   | (0.005)   | (0.005)   | (0.005)   |  |
| 6  |                                                             |           |           |           |           |  |
| 7  | Worker                                                      | 0.013*    | 0.050***  | 0.013*    | 0.050***  |  |
| 8  |                                                             | (0.005)   | (0.005)   | (0.005)   | (0.005)   |  |
| 9  |                                                             |           |           |           |           |  |
| 10 | Agricultural labor                                          | -0.006    | 0.050***  | -0.006    | 0.050***  |  |
| 11 |                                                             | (0.005)   | (0.005)   | (0.005)   | (0.005)   |  |
| 12 |                                                             |           |           |           |           |  |
| 13 | Student                                                     | -0.051*** | -0.100*** | -0.050*** | -0.100*** |  |
| 14 |                                                             | (0.005)   | (0.005)   | (0.005)   | (0.005)   |  |
| 15 |                                                             |           |           |           |           |  |
| 16 | Freelancer                                                  | -0.057*** | -0.001    | -0.057*** | -0.001    |  |
| 17 |                                                             | (0.005)   | (0.005)   | (0.005)   | (0.005)   |  |
| 18 |                                                             |           |           |           |           |  |
| 19 | Self-employed                                               | -0.051*** | -0.017*   | -0.051*** | -0.017*   |  |
| 20 |                                                             | (0.007)   | (0.007)   | (0.007)   | (0.007)   |  |
| 21 |                                                             |           |           |           |           |  |
| 22 | Unemployed                                                  | -0.048*** | -0.014**  | -0.048*** | -0.014**  |  |
| 23 |                                                             | (0.005)   | (0.005)   | (0.005)   | (0.005)   |  |
| 24 |                                                             |           |           |           |           |  |
| 25 | Retired                                                     | 0.062***  | 0.030***  | 0.062***  | 0.030***  |  |
| 26 |                                                             | (0.005)   | (0.005)   | (0.005)   | (0.005)   |  |
| 27 |                                                             |           |           |           |           |  |
| 28 | Others                                                      | 0.004     | 0.021***  | 0.005     | 0.021***  |  |
| 29 |                                                             | (0.005)   | (0.005)   | (0.005)   | (0.005)   |  |
| 30 |                                                             |           |           |           |           |  |
| 31 |                                                             |           |           |           |           |  |
| 32 |                                                             |           |           |           |           |  |
| 33 | <i>Whether or not surgery was required (vs No)</i>          |           |           |           |           |  |
| 34 | Surgery (Yes)                                               | 0.127***  | 0.714***  | 0.126***  | 0.714***  |  |
| 35 |                                                             | (0.001)   | (0.001)   | (0.001)   | (0.001)   |  |
| 36 |                                                             |           |           |           |           |  |
| 37 |                                                             |           |           |           |           |  |
| 38 | <i>Health care institution levels (vs primary hospital)</i> |           |           |           |           |  |
| 39 | Secondary hospital                                          | 0.067     | 0.443***  | 0.067     | 0.443***  |  |
| 40 |                                                             | (0.035)   | (0.043)   | (0.035)   | (0.043)   |  |
| 41 |                                                             |           |           |           |           |  |
| 42 | Tertiary hospital                                           | -0.190*** | 0.681***  | -0.190*** | 0.681***  |  |
| 43 |                                                             | (0.049)   | (0.061)   | (0.049)   | (0.061)   |  |
| 44 |                                                             |           |           |           |           |  |
| 45 | Unassigned hospital                                         | 0.055     | 0.168***  | 0.055     | 0.168***  |  |
| 46 |                                                             | (0.028)   | (0.035)   | (0.028)   | (0.035)   |  |
| 47 |                                                             |           |           |           |           |  |
| 48 | Primary healthcare sector                                   | -0.456*** | -0.825*** | -0.456*** | -0.825*** |  |
| 49 |                                                             | (0.036)   | (0.045)   | (0.036)   | (0.045)   |  |
| 50 |                                                             |           |           |           |           |  |
| 51 | Other providers                                             | -0.548*** | 0.014     | -0.547*** | 0.014     |  |
| 52 |                                                             | (0.048)   | (0.059)   | (0.048)   | (0.059)   |  |
| 53 |                                                             |           |           |           |           |  |
| 54 |                                                             |           |           |           |           |  |
| 55 |                                                             |           |           |           |           |  |
| 56 | <i>Ownership type (vs private)</i>                          |           |           |           |           |  |
| 57 | Public                                                      | 0.222***  | -0.041    | 0.222***  | -0.041    |  |
| 58 |                                                             | (0.027)   | (0.034)   | (0.027)   | (0.034)   |  |
| 59 |                                                             |           |           |           |           |  |
| 60 |                                                             |           |           |           |           |  |

|              |           |           |           |           |
|--------------|-----------|-----------|-----------|-----------|
| Missing      | 0.171*    | -0.325*** | 0.172*    | -0.325*** |
|              | (0.067)   | (0.083)   | (0.067)   | (0.083)   |
| Constant     | 1.848***  | 7.337***  | 1.848***  | 7.337***  |
|              | (0.025)   | (0.031)   | (0.025)   | (0.031)   |
| Observations | 4,021,677 | 4,021,677 | 4,021,677 | 4,021,677 |

*Note:* Cells contain coefficient (and standard error). \*p <0.05, \*\*p<0.01, \*\*\*p<0.001.

<sup>a</sup>. UEBMI (Urban Employee Basic Medical Insurance); URBMI (Urban Resident Basic Medical Insurance); NRCMS (New Rural Cooperative System).

<sup>b</sup>. Occupations with too small a sample were merged with similar occupations.

For peer review only

**Table A3.** Inpatient wounds point prevalence estimates by wound types and demographic characteristics

| Variable         | Pressure ulcers |                           | Diabetic ulcers |                           | Venous leg ulcers |                           | Non-healing surgical wounds |                           | Other ulcers |                           |
|------------------|-----------------|---------------------------|-----------------|---------------------------|-------------------|---------------------------|-----------------------------|---------------------------|--------------|---------------------------|
|                  | frequency       | point prevalence (95% CI) | frequency       | point prevalence (95% CI) | frequency         | point prevalence (95% CI) | frequency                   | point prevalence (95% CI) | frequency    | point prevalence (95% CI) |
| <i>Age group</i> |                 |                           |                 |                           |                   |                           |                             |                           |              |                           |
| 0-9              | 4               | 0.009<br>(0.004, 0.024)   | 0               | 0.000<br>(0.000, 0.009)   | 0                 | 0.000<br>(0.000, 0.009)   | 73                          | 0.172<br>(0.137, 0.217)   | 18           | 0.042<br>(0.027, 0.067)   |
| 10-19            | 17              | 0.173<br>(0.108, 0.277)   | 0               | 0.000<br>(0.000, 0.039)   | 0                 | 0.000<br>(0.000, 0.039)   | 125                         | 1.272<br>(1.068, 1.515)   | 29           | 0.295<br>(0.205, 0.424)   |
| 20-29            | 48              | 0.164<br>(0.123, 0.217)   | 7               | 0.024<br>(0.012, 0.049)   | 2                 | 0.007<br>(0.002, 0.025)   | 344                         | 1.172<br>(1.055, 1.303)   | 61           | 0.208<br>(0.162, 0.267)   |
| 30-39            | 104             | 0.369<br>(0.305, 0.447)   | 43              | 0.153<br>(0.113, 0.206)   | 17                | 0.060<br>(0.038, 0.097)   | 331                         | 1.175<br>(1.055, 1.308)   | 89           | 0.316<br>(0.257, 0.389)   |
| 40-49            | 347             | 0.722<br>(0.650, 0.802)   | 221             | 0.460<br>(0.403, 0.525)   | 81                | 0.169<br>(0.136, 0.209)   | 695                         | 1.446<br>(1.342, 1.557)   | 225          | 0.468<br>(0.411, 0.533)   |
| 50-59            | 498             | 0.871<br>(0.798, 0.951)   | 611             | 1.068<br>(0.987, 1.157)   | 223               | 0.390<br>(0.342, 0.445)   | 831                         | 1.453<br>(1.358, 1.555)   | 326          | 0.570<br>(0.511, 0.635)   |
| 60-69            | 983             | 1.176<br>(1.105, 1.252)   | 891             | 1.066<br>(0.998, 1.138)   | 415               | 0.497<br>(0.451, 0.547)   | 997                         | 1.193<br>(1.121, 1.269)   | 477          | 0.571<br>(0.522, 0.624)   |
| 70-79            | 1,643           | 2.296<br>(2.188, 2.409)   | 939             | 1.312<br>(1.231, 1.399)   | 287               | 0.401<br>(0.357, 0.45)    | 542                         | 0.757<br>(0.696, 0.824)   | 474          | 0.662<br>(0.605, 0.725)   |
| 80-89            | 1,822           | 6.085<br>(5.813, 6.370)   | 501             | 1.673<br>(1.533, 1.826)   | 104               | 0.347<br>(0.287, 0.421)   | 136                         | 0.454<br>(0.384, 0.537)   | 262          | 0.875<br>(0.775, 0.987)   |

|                              |       |                            |       |                         |       |                         |       |                         |       |                         |
|------------------------------|-------|----------------------------|-------|-------------------------|-------|-------------------------|-------|-------------------------|-------|-------------------------|
| 90+                          | 449   | 13.480<br>(12.296, 14.776) | 56    | 1.681<br>(1.295, 2.182) | 10    | 0.300<br>(0.163, 0.553) | 16    | 0.480<br>(0.296, 0.780) | 52    | 1.561<br>(1.191, 2.046) |
| <i>Gender</i>                |       |                            |       |                         |       |                         |       |                         |       |                         |
| Male                         | 3,466 | 1.809<br>(1.749, 1.870)    | 1,848 | 0.964<br>(0.921, 1.009) | 810   | 0.423<br>(0.395, 0.453) | 2,263 | 1.181<br>(1.133, 1.230) | 1,289 | 0.673<br>(0.637, 0.710) |
| Female                       | 2,449 | 1.158<br>(1.113, 1.205)    | 1,421 | 0.672<br>(0.638, 0.708) | 326   | 0.154<br>(0.138, 0.172) | 1,826 | 0.864<br>(0.825, 0.904) | 724   | 0.342<br>(0.318, 0.368) |
| Missing                      | 0     | 0.000<br>(0.000, 1.265)    | 0     | 0.000<br>(0.000, 1.265) | 3     | 0.989<br>(0.336, 2.904) | 1     | 0.330<br>(0.017, 1.865) | 0     | 0.000<br>(0.000, 1.265) |
| <i>Ethnic group</i>          |       |                            |       |                         |       |                         |       |                         |       |                         |
| Minority                     | 106   | 0.512<br>(0.424, 0.619)    | 42    | 0.203<br>(0.150, 0.274) | 17    | 0.082<br>(0.051, 0.132) | 244   | 1.179<br>(1.040, 1.337) | 62    | 0.300<br>(0.234, 0.384) |
| Han                          | 5,809 | 1.518<br>(1.479, 1.557)    | 3,227 | 0.843<br>(0.815, 0.873) | 1,122 | 0.293<br>(0.277, 0.311) | 3,846 | 1.005<br>(0.974, 1.037) | 1,951 | 0.510<br>(0.488, 0.533) |
| <i>Occupation</i>            |       |                            |       |                         |       |                         |       |                         |       |                         |
| Civil Servants & active army | 31    | 1.524<br>(1.074, 2.162)    | 11    | 0.541<br>(0.302, 0.968) | 5     | 0.246<br>(0.105, 0.575) | 29    | 1.426<br>(0.993, 2.047) | 12    | 0.590<br>(0.338, 1.031) |
| Professionals & technical    | 30    | 0.904<br>(0.633, 1.290)    | 15    | 0.452<br>(0.274, 0.745) | 4     | 0.121<br>(0.047, 0.310) | 39    | 1.175<br>(0.86, 1.606)  | 8     | 0.241<br>(0.122, 0.476) |
| Office clerk & manager       | 78    | 0.755<br>(0.605, 0.942)    | 55    | 0.533<br>(0.409, 0.693) | 18    | 0.174<br>(0.11, 0.275)  | 152   | 1.472<br>(1.256, 1.725) | 44    | 0.426<br>(0.317, 0.572) |
| Worker                       | 103   | 1.253<br>(1.033, 1.519)    | 60    | 0.730<br>(0.567, 0.939) | 19    | 0.231<br>(0.148, 0.361) | 115   | 1.399<br>(1.166, 1.679) | 59    | 0.718<br>(0.557, 0.926) |
| Agricultural labor           | 1,999 | 1.100<br>(1.053, 1.150)    | 1,226 | 0.675<br>(0.638, 0.714) | 608   | 0.335<br>(0.309, 0.362) | 1,549 | 0.853<br>(0.811, 0.896) | 902   | 0.497<br>(0.465, 0.53)  |

1  
2  
3  
4  
5  
6  
7  
8  
9  
10  
11  
12  
13  
14  
15  
16  
17  
18  
19  
20  
21  
22  
23  
24  
25  
26  
27  
28  
29  
30  
31  
32  
33  
34  
35  
36  
37  
38  
39  
40  
41  
42  
43  
44  
45  
46

|               |       |                |       |                |     |                |       |                |     |                |
|---------------|-------|----------------|-------|----------------|-----|----------------|-------|----------------|-----|----------------|
| Student       | 19    | 0.183          | 4     | 0.039          | 2   | 0.019          | 87    | 0.839          | 21  | 0.203          |
|               |       | (0.117, 0.286) |       | (0.015, 0.099) |     | (0.005, 0.07)  |       | (0.681, 1.035) |     | (0.133, 0.31)  |
| Freelancer    | 124   | 1.259          | 72    | 0.731          | 18  | 0.183          | 136   | 1.381          | 77  | 0.782          |
|               |       | (1.056, 1.501) |       | (0.581, 0.921) |     | (0.116, 0.289) |       | (1.168, 1.633) |     | (0.626, 0.977) |
| Self-employed | 13    | 0.683          | 15    | 0.789          | 6   | 0.315          | 18    | 0.946          | 11  | 0.578          |
|               |       | (0.399, 1.169) |       | (0.478, 1.301) |     | (0.145, 0.688) |       | (0.599, 1.495) |     | (0.323, 1.035) |
| Unemployed    | 205   | 1.640          | 85    | 0.680          | 30  | 0.240          | 113   | 0.904          | 58  | 0.464          |
|               |       | (1.431, 1.881) |       | (0.550, 0.841) |     | (0.168, 0.343) |       | (0.752, 1.087) |     | (0.359, 0.600) |
| Retired       | 1,113 | 5.894          | 484   | 2.563          | 36  | 0.191          | 186   | 0.985          | 115 | 0.609          |
|               |       | (5.559, 6.250) |       | (2.345, 2.802) |     | (0.138, 0.264) |       | (0.853, 1.137) |     | (0.507, 0.731) |
| Others        | 2,200 | 1.524          | 1,242 | 0.861          | 393 | 0.272          | 1,666 | 1.154          | 706 | 0.489          |
|               |       | (1.462, 1.589) |       | (0.814, 0.910) |     | (0.247, 0.301) |       | (1.100, 1.211) |     | (0.454, 0.527) |

STROBE Statement—Checklist of items that should be included in reports of *cross-sectional studies*

|                              | Item No | Recommendation                                                                                                                                                                                                          |
|------------------------------|---------|-------------------------------------------------------------------------------------------------------------------------------------------------------------------------------------------------------------------------|
| <b>Title and abstract</b>    | 1       | (a) Indicate the study's design with a commonly used term in the title or the abstract<br><b>Yes</b>                                                                                                                    |
|                              |         | (b) Provide in the abstract an informative and balanced summary of what was done and what was found <b>Yes</b>                                                                                                          |
| <b>Introduction</b>          |         |                                                                                                                                                                                                                         |
| Background/rationale         | 2       | Explain the scientific background and rationale for the investigation being reported<br><b>Yes</b>                                                                                                                      |
| Objectives                   | 3       | State specific objectives, including any prespecified hypotheses <b>Yes</b>                                                                                                                                             |
| <b>Methods</b>               |         |                                                                                                                                                                                                                         |
| Study design                 | 4       | Present key elements of study design early in the paper <b>Yes</b>                                                                                                                                                      |
| Setting                      | 5       | Describe the setting, locations, and relevant dates, including periods of recruitment, exposure, follow-up, and data collection <b>Yes</b>                                                                              |
| Participants                 | 6       | (a) Give the eligibility criteria, and the sources and methods of selection of participants <b>Yes</b>                                                                                                                  |
| Variables                    | 7       | Clearly define all outcomes, exposures, predictors, potential confounders, and effect modifiers. Give diagnostic criteria, if applicable <b>Yes</b>                                                                     |
| Data sources/<br>measurement | 8*      | For each variable of interest, give sources of data and details of methods of assessment (measurement). Describe comparability of assessment methods if there is more than one group <b>Yes</b>                         |
| Bias                         | 9       | Describe any efforts to address potential sources of bias <b>Yes</b>                                                                                                                                                    |
| Study size                   | 10      | Explain how the study size was arrived at <b>Yes</b>                                                                                                                                                                    |
| Quantitative variables       | 11      | Explain how quantitative variables were handled in the analyses. If applicable, describe which groupings were chosen and why <b>Yes</b>                                                                                 |
| Statistical methods          | 12      | (a) Describe all statistical methods, including those used to control for confounding<br><b>Yes</b>                                                                                                                     |
|                              |         | (b) Describe any methods used to examine subgroups and interactions <b>Yes</b>                                                                                                                                          |
|                              |         | (c) Explain how missing data were addressed <b>Yes</b>                                                                                                                                                                  |
|                              |         | (d) If applicable, describe analytical methods taking account of sampling strategy<br><b>NA</b>                                                                                                                         |
|                              |         | (e) Describe any sensitivity analyses <b>NA</b>                                                                                                                                                                         |
| <b>Results</b>               |         |                                                                                                                                                                                                                         |
| Participants                 | 13*     | (a) Report numbers of individuals at each stage of study—eg numbers potentially eligible, examined for eligibility, confirmed eligible, included in the study, completing follow-up, and analysed <b>Yes</b>            |
|                              |         | (b) Give reasons for non-participation at each stage <b>NA</b>                                                                                                                                                          |
|                              |         | (c) Consider use of a flow diagram <b>NA</b>                                                                                                                                                                            |
| Descriptive data             | 14*     | (a) Give characteristics of study participants (eg demographic, clinical, social) and information on exposures and potential confounders <b>Yes</b>                                                                     |
|                              |         | (b) Indicate number of participants with missing data for each variable of interest<br><b>Yes</b>                                                                                                                       |
| Outcome data                 | 15*     | Report numbers of outcome events or summary measures <b>Yes</b>                                                                                                                                                         |
| Main results                 | 16      | (a) Give unadjusted estimates and, if applicable, confounder-adjusted estimates and their precision (eg, 95% confidence interval). Make clear which confounders were adjusted for and why they were included <b>Yes</b> |



1  
2  
3  
4  
5  
6  
7  
8  
9  
10  
11  
12  
13  
14  
15  
16  
17  
18  
19  
20  
21  
22  
23  
24  
25  
26  
27  
28  
29  
30  
31  
32  
33  
34  
35  
36  
37  
38  
39  
40  
41  
42  
43  
44  
45  
46  
47  
48  
49  
50  
51  
52  
53  
54  
55  
56  
57  
58  
59  
60

(b) Report category boundaries when continuous variables were categorized **Yes**

(c) If relevant, consider translating estimates of relative risk into absolute risk for a meaningful time period **NA**

|                          |    |                                                                                                                                                                                       |
|--------------------------|----|---------------------------------------------------------------------------------------------------------------------------------------------------------------------------------------|
| Other analyses           | 17 | Report other analyses done—eg analyses of subgroups and interactions, and sensitivity analyses <b>Yes</b>                                                                             |
| <b>Discussion</b>        |    |                                                                                                                                                                                       |
| Key results              | 18 | Summarise key results with reference to study objectives <b>Yes</b>                                                                                                                   |
| Limitations              | 19 | Discuss limitations of the study, taking into account sources of potential bias or imprecision. Discuss both direction and magnitude of any potential bias <b>Yes</b>                 |
| Interpretation           | 20 | Give a cautious overall interpretation of results considering objectives, limitations, multiplicity of analyses, results from similar studies, and other relevant evidence <b>Yes</b> |
| Generalisability         | 21 | Discuss the generalisability (external validity) of the study results <b>Yes</b>                                                                                                      |
| <b>Other information</b> |    |                                                                                                                                                                                       |
| Funding                  | 22 | Give the source of funding and the role of the funders for the present study and, if applicable, for the original study on which the present article is based <b>Yes</b>              |

\*Give information separately for exposed and unexposed groups.

**Note:** An Explanation and Elaboration article discusses each checklist item and gives methodological background and published examples of transparent reporting. The STROBE checklist is best used in conjunction with this article (freely available on the Web sites of PLoS Medicine at <http://www.plosmedicine.org/>, Annals of Internal Medicine at <http://www.annals.org/>, and Epidemiology at <http://www.epidem.com/>). Information on the STROBE Initiative is available at [www.strobe-statement.org](http://www.strobe-statement.org).

# BMJ Open

## Epidemiology and disease burden of complex wounds for inpatients in China: an observational study from Sichuan province

|                                 |                                                                                                                                                                                                                                                                                                                                                                                                                                                            |
|---------------------------------|------------------------------------------------------------------------------------------------------------------------------------------------------------------------------------------------------------------------------------------------------------------------------------------------------------------------------------------------------------------------------------------------------------------------------------------------------------|
| Journal:                        | <i>BMJ Open</i>                                                                                                                                                                                                                                                                                                                                                                                                                                            |
| Manuscript ID                   | bmjopen-2020-039894.R1                                                                                                                                                                                                                                                                                                                                                                                                                                     |
| Article Type:                   | Original research                                                                                                                                                                                                                                                                                                                                                                                                                                          |
| Date Submitted by the Author:   | 08-Aug-2020                                                                                                                                                                                                                                                                                                                                                                                                                                                |
| Complete List of Authors:       | Jiang, Qingling; Sichuan University, West China School of Public Health and West China Fourth Hospital; Sichuan University, West China Research Center for Rural Health Development<br>Dumville, Jo C.; Univ Manchester,<br>Cullum, Nicky; The University of Manchester, School of Nursing, Midwifery & Social Work<br>Pan, Jay; Sichuan University,<br>Liu, Zhenmi; Sichuan University, West China School of Public Health and West China Fourth Hospital |
| <b>Primary Subject Heading</b>: | Epidemiology                                                                                                                                                                                                                                                                                                                                                                                                                                               |
| Secondary Subject Heading:      | Epidemiology, Health economics, Public health                                                                                                                                                                                                                                                                                                                                                                                                              |
| Keywords:                       | EPIDEMIOLOGY, HEALTH ECONOMICS, PUBLIC HEALTH                                                                                                                                                                                                                                                                                                                                                                                                              |
|                                 |                                                                                                                                                                                                                                                                                                                                                                                                                                                            |

SCHOLARONE™  
Manuscripts



I, the Submitting Author has the right to grant and does grant on behalf of all authors of the Work (as defined in the below author licence), an exclusive licence and/or a non-exclusive licence for contributions from authors who are: i) UK Crown employees; ii) where BMJ has agreed a CC-BY licence shall apply, and/or iii) in accordance with the terms applicable for US Federal Government officers or employees acting as part of their official duties; on a worldwide, perpetual, irrevocable, royalty-free basis to BMJ Publishing Group Ltd ("BMJ") its licensees and where the relevant Journal is co-owned by BMJ to the co-owners of the Journal, to publish the Work in this journal and any other BMJ products and to exploit all rights, as set out in our [licence](#).

The Submitting Author accepts and understands that any supply made under these terms is made by BMJ to the Submitting Author unless you are acting as an employee on behalf of your employer or a postgraduate student of an affiliated institution which is paying any applicable article publishing charge ("APC") for Open Access articles. Where the Submitting Author wishes to make the Work available on an Open Access basis (and intends to pay the relevant APC), the terms of reuse of such Open Access shall be governed by a Creative Commons licence – details of these licences and which [Creative Commons](#) licence will apply to this Work are set out in our licence referred to above.

Other than as permitted in any relevant BMJ Author's Self Archiving Policies, I confirm this Work has not been accepted for publication elsewhere, is not being considered for publication elsewhere and does not duplicate material already published. I confirm all authors consent to publication of this Work and authorise the granting of this licence.

## Epidemiology and disease burden of complex wounds for inpatients in China: an observational study from Sichuan province

Qingling Jiang<sup>1,2</sup>, Jo C Dumville<sup>3</sup>, Nicky Cullum<sup>3</sup>, Jay Pan<sup>1,2\*</sup>, Zhenmi Liu<sup>1\*</sup>

1. West China School of Public Health and West China Fourth Hospital, Sichuan University, China

2. West China Research Center for Rural Health Development, Sichuan University, China

3. Division of Nursing, Midwifery and Social Work, School of Health Sciences, Faculty of Biology, Medicine and Health, University of Manchester, Manchester Academic Health Science Centre, Manchester, UK.

\* Corresponding authors: [panjie.jay@scu.edu.cn](mailto:panjie.jay@scu.edu.cn); [zhenmiliu@scu.edu.cn](mailto:zhenmiliu@scu.edu.cn)

### ABSTRACT

**Objectives:** To investigate the period prevalence of complex wounds among the overall inpatients, and the impact of complex wounds on inpatient health expense and length of hospital stay.

**Design:** An observational study.

**Setting:** 6,056 health care institutions across Sichuan province in China.

**Participants:** This study included 4,033,763 people admitted to health care institutions during 1 September 2018 and 31 December 2018.

**Results:** The point prevalence of complex wounds was 4.07 per 1,000 among inpatients in Sichuan. The most common complex wounds were pressure ulcers (1.47 per 1,000 among inpatients). Older, male, Han ethnic groups and retired people were most likely to suffer from complex wounds. The median length of hospital stay was longer for those with complex wounds as their main condition of treatment compared with all-cause admissions in Sichuan (12 days compared with 7 days;  $P<0.001$ ). The median cost of care for people with complex wounds was higher than for admission for any cause (6,500.18 CNY compared with 3,337.16 CNY;  $P<0.001$ ). People with pressure ulcers had the longest length of stay, whilst people with ulcers related to diabetes incurred the highest costs.

**Conclusions:** Complex wounds, especially pressure ulcers, are common in Sichuan province and their presence is associated with significantly longer lengths of hospital stay and higher medical costs. Additionally, this study only included admitted inpatients during the sampling time period, hence the prevalence of complex wounds may be underestimated. The high prevalence rate and heavy direct and indirect disease burden of complex wounds indicate that health policies for early detection and prevention of complex wounds in elders are urgently needed.

**Strengths and limitations of this study**

- This geographically defined study is the first to report the prevalence and disease burden of complex wounds in inpatients in China.
- Both disease code (ICD-10) and disease diagnosis were used in this study to make sure that complex wounds were correctly identified and classified.
- As this was based on second-hand data, we were unable to identify the patients who may have had complex wounds that were not recorded in discharge records.
- This study only included admitted inpatients during the sampling time period, hence the prevalence of complex wounds may be underestimated.

For peer review only

## INTRODUCTION

Complex wounds (wounds with superficial, partial or full-thickness skin loss healing by secondary intention), such as foot ulcers, legs ulcers, pressure ulcers, open trauma and surgical wounds, heal slowly and are complex to treat and care for:<sup>1,2</sup> They are often referred to as chronic wounds.<sup>3</sup> Complex wounds have been shown to adversely affect the health related quality of life of those affected as they are often painful and can become infected.<sup>4,5</sup> Complex wounds can lead to amputation,<sup>6,7</sup> which causes physical and mental harm, and severely affect productivity. Patients with complex wounds have a higher mortality than people without.<sup>8,9</sup> Management of complex wounds is costly, with crudely estimated annual costs of £3 billion in the UK, \$2.85 billion in Australia and \$25 billion in the USA.<sup>10</sup> In Europe it has been estimated that 2-4% of health care budgets are spent on wound management.<sup>11</sup>

Epidemiological estimates of complex wounds prevalence vary. It was estimated that 6.5 million patients have chronic wounds in the US and 1% of population would experience wounds problem in Denmark.<sup>12,13</sup> In 2003, Rodrigues et al conducted a cross sectional study which included 149 Canadian local community service centers, and found the point prevalence of chronic wounds (including pressure ulcer, venous ulcer, and diabetic foot wound) among home care patients was 1.4%.<sup>14</sup> Using health insurance data, Kristina et al showed that 1.04 % of insured German patients had chronic wounds (including diabetic foot ulcer, pressure ulcer, and leg ulcer), and 0.43 % of them had leg ulcer which was the most common wound in 2012.<sup>15</sup> Recently, Hall and Gray have conducted community-based multiservice, cross sectional surveys in the UK, found that the point prevalence of complex wounds was 1.47 ‰ in Leeds and 1.64 ‰ in the north of England, and amongst the most frequent wound type was leg ulcer.<sup>1,10</sup> The same survey was carried out in Slovenia and found that the point prevalence of open surgical wounds was 0.38 ‰.<sup>4</sup>

Epidemiological research on complex wounds in China is limited. In 1998, Fu screened 30,000 hospitalized surgical patients in 15 Chinese hospitals for chronic dermal ulcers, and found that the incidence of wounds was from 1.5% to 3.0%, with trauma and infection being the main causes.<sup>16</sup> In 2008, similar surveys were conducted in 17 tertiary hospitals in 14 Chinese provinces, showing the prevalence of chronic wounds was 1.69 per 1,000 inpatients and the leading causes were diabetes and trauma in inpatients.<sup>17</sup> As both studies focused only on specific hospitals, the results may not allow inference on the point prevalence of complex wounds for inpatients national wide. Furthermore these data are now over a decade old and changing population demographics may result in changes in estimates. In this study, we systematically analyzed hospital discharge data from Sichuan province during the fourth quarter of calendar year 2018, aiming to investigate the period prevalence of complex wounds among the overall inpatients, and the impact of complex wounds on inpatient health expense and length of hospital stay (LOS).

## CONTEXT

The Chinese healthcare system is characterized by a three-tier delivery system. The rural three tier system comprises village clinics, township health centers (THCs), and county hospitals; while the urban regions have community health centers/stations (CHCs), city hospitals including district hospitals, and municipal/regional hospitals. Additionally, the county and city hospitals are classified into three levels – primary, secondary and tertiary –

1  
2  
3 with supposedly increasing quality based on their clinical quality, service quality, management  
4 quality, medical safety, and clinical skills and research.<sup>18</sup> THCs and CHCs are called primary  
5 healthcare institutions which mainly provide primary care and public health services. Whilst  
6 primary healthcare institutions have a gatekeeping role to reduce people directly accessing  
7 specialist hospital services, patients can still go directly to higher level hospitals for medical  
8 services without attending THCs or CHCs first. Thus, in China, hospitals *de facto* provide both  
9 primary and specialist care; a significant difference from most health care systems in developed  
10 countries. When people are discharged from healthcare institutions (primary healthcare  
11 institution or hospital), their discharge records, containing demographic details together with  
12 data about their diagnoses and medical care costs, are completed by the Chief Physician (see  
13 Appendix, Table A1). These administrative data provide an opportunity to study the number  
14 of people with complex wounds in more detail. To ensure that data from all relevant people  
15 were considered we included discharge data from all patients from primary healthcare  
16 institutions (THCs/CHCs) and from (primary/secondary/tertiary) hospitals.

17  
18  
19 In China, over 95% of residents have Social Health Insurance (New Cooperative Medical  
20 Scheme for the rural population; Urban Resident Basic Medical Insurance for the unemployed  
21 urban people; Urban Employee Basic Medical Insurance for urban workers) which covers  
22 access to all primary healthcare institutions and public hospitals, and some private hospitals.<sup>19</sup>  
23 The inpatient costs for people with Social Health Insurance consisted of two parts—out-of-  
24 pocket payments and insurance reimbursement, while almost all the outpatient cost are out-of-  
25 pocket. Hence this study assumed that most, if not all, patients with complex wounds would  
26 get inpatient service, instead of outpatient service from healthcare institutions.

27  
28 This study focused on Sichuan province. The results from Sichuan are likely to be applicable  
29 to much of China. Sichuan is the fifth largest and the third most populous province in China  
30 (83.41 million people recorded in 2018). The distribution of economic development is uneven,  
31 the geographic environment is varied, and the composition of the population is diverse. West  
32 Sichuan is sparsely populated, mountainous with poor economic development, and east  
33 Sichuan is densely populated, plain with well economic development, more health care  
34 institutions (see Figure A1 in Appendix). This is roughly consistent with the overall situation  
35 in China.<sup>20,21</sup>

## 36 37 38 39 40 41 42 43 **METHODS**

### 44 45 **Study population and data source**

46  
47 Between 1 September 2018 and 31 December 2018, a total of 4,033,763 people were  
48 admitted to 6,056 health care institutions across Sichuan province. All were included in this  
49 retrospective, data-based study. Individual-level information was extracted from discharge  
50 records provided by the Health Information Centre of Sichuan Province. When performing data  
51 analysis, all healthcare institutions were categorized based on their situation at the time of data  
52 collection (i.e. in calendar year 2018).

### 53 54 55 **Classification of cases**

56  
57 All people admitted with complex wounds or who developed one or more complex wounds  
58 during their stay were identified according to the International Statistical Classification of  
59 Diseases and Related Health Problems 10th Revision (ICD-10) (see Table 1) and the  
60

1  
2  
3 corresponding diagnosis in discharge records. This included people with pressure ulcers of  
4 Stage 2 or above,<sup>22</sup> ulcers in people with diabetes, venous leg ulcers, non-healing surgical  
5 wounds and other ulcers (leg ulcers, upper limb ulcers, skin ulcers, gangrene, infection of  
6 amputation stump). We did not include people with open, traumatic wounds or burns in this  
7 study.  
8  
9

10  
11 [Insert Table 1 about here]  
12

### 13 **Statistical analysis**

14  
15 All analyses were performed using statistical analysis system R-3.5.1. All point prevalence  
16 estimates were produced using the binomial proportion and are presented alongside 95%  
17 confidence intervals (CIs). The inpatient point prevalence of complex wounds was estimated  
18 using the number of people with at least one wound (the numerator) and all inpatients as  
19 denominator. To get a crude estimate of the point prevalence of complex wounds in  
20 community-based population, this study assumed that all people with one or more complex  
21 wounds received inpatient service from healthcare institutions and the point prevalence of  
22 complex wounds for community-based population was estimated using people living in  
23 Sichuan at present and with at least one complex wound (the numerator) and the population of  
24 Sichuan in 2018<sup>23</sup> as the denominator.  
25  
26  
27

28 When estimating the direct disease burden (median of length of stay (LOS) and medical  
29 costs) of complex wounds, only people whose principal cause of hospitalization (principal  
30 diagnosis) was the complex wound were included. Wilcoxon rank sum test and Kruskal-Wallis  
31 rank sum test were used to test if LOS and expense were statistically different between groups.  
32 We also extracted data on people whose principal cause of hospitalization was not the complex  
33 wound but who were recorded as having a complex wound of relevance in this study as a  
34 comorbidity (i.e. though the patient did have one or more complex wound, their main reason  
35 for admission was not the wound), and compared their LOS and inpatient costs with patients  
36 without complex wounds to determine the additional effect of complex wounds on LOS and  
37 inpatient costs. Multivariable linear regression was fitted to control for potentially confounding  
38 factors which were documented. Since the confounders are multilevel in our study, we  
39 constructed a two-level hierarchical linear model, where level 1 covariables included the  
40 patient's age, gender, occupation, social insurance program, whether or not surgery was  
41 required, and Charlson Index (a widely used tool to measure comorbid disease status; a higher  
42 score equals worse health condition) adjusting for non-complex wound related comorbidity;<sup>24</sup>  
43 level 2 covariables included health care institution level type (tertiary hospital, secondary  
44 hospital, primary hospital, unassigned hospital, primary health care institution and others) and  
45 ownership type (public or private). Healthcare institutions were included as a random effect to  
46 account for the within institution correlation for patients admitted in the same institution.  
47  
48  
49  
50  
51  
52

53 To avoid the impact of incorrect records on disease burden estimates, when analyzing the  
54 effect of complex wounds on LOS and inpatient expense, observations were selected based on  
55 the following criteria: 1) the length of stay was at least one day; 2) the per capita inpatient  
56 expense was more than 100 CNY. Thus, ultimately 4,026,725 records were used for  
57 multivariable disease burden analysis.  
58  
59  
60



## Patient and public involvement

Neither patients nor members of the public were involved in the study design or conduct of this study.

## RESULTS

### Prevalence of complex wounds

A total of 16,426 cases of patients with complex wounds was identified from the records of 4,033,763 patients during the fourth quarter of calendar year 2018. The point prevalence of complex wounds was 4.07 per 1,000 of inpatients (95% CI: 4.01 to 4.13) and 0.19 per 1,000 of the whole population in Sichuan province (95% CI: 0.19 to 0.20) (Table 2). It should be noted that this prevalence is likely underestimated as it is almost certain that not all patients with complex wounds had been admitted. Pressure ulcers were the most common complex wound with a point prevalence of 1.47 per 1,000 of inpatients (95% CI: 1.43 to 1.50) and 0.07 per 1,000 of the whole population (95% CI: 0.07 to 0.07).

[Insert Table 2 about here]

Table 3 shows the point prevalence estimates for all complex wounds by demographic characteristics. Most inpatients with complex wounds were aged between 60 and 79 years old. The prevalence of complex wounds amongst inpatients increased with age, and was lowest in patients younger than 10 and highest in patients over 90. Males had higher point prevalence estimate (5.05 per 1,000 with 95% CI 4.95 to 5.15) than females (3.19 per 1,000 with 95% CI 3.12 to 3.27). Prevalence was higher for Han (Chinese) than ethnic minorities at 4.17 per 1,000 (95% CI: 4.11 to 4.23) compared with 2.28 per 1,000 (95% CI: 2.08 to 2.49). Of the 16,426 patients with complex wounds, most were agricultural labourers from rural areas, and the highest point prevalence estimate occurred in retired people with 10.24 per 1,000 (95% CI: 9.80 to 10.71). After adjusting for age, the prevalence of complex wounds was still significantly different by gender (likelihood ratio test:  $P < 0.001$ ), ethnicity (likelihood ratio test:  $P < 0.001$ ) and occupation (likelihood ratio test:  $P < 0.001$ ).

[Insert table 3 and 4 about here]

Figure 1 shows the point prevalence estimates with 95% confidence intervals for individual complex wound types by demographic characteristics. Prevalence rates for individual wound types increased with age except for venous leg ulcers and non-healing surgical wounds whose highest rates occurred in 60-69 (0.50 per 1,000; 95% CI: 0.45 to 0.55) and 50-59 years old (1.45 per 1,000; 95% CI: 1.36 to 1.56) respectively. The highest point prevalence rates for pressure ulcers, diabetic ulcers and other ulcers were found in patients aged 90 years and over, which were 13.48 per 1,000 (95% CI: 12.30 to 14.78), 1.68 per 1,000 (95% CI: 1.30 to 2.18), 1.56 per 1,000 (95% CI: 1.19 to 2.05), respectively. Children younger than 10 were the least likely to have any complex wounds. Pressure ulcers are the most prevalent complex wound of those studied while venous leg ulcers are the least common, and females have much lower prevalence of all kinds of wounds than males. Prevalence rates for individual wound types were higher for Han (Chinese) than ethnic minorities except for non-healing surgical wounds. The

prevalence for individual complex wound types are highly different in occupation groups. The highest prevalence for pressure ulcer (5.89 per 1,000; 95% CI: 5.56 to 6.25) and diabetic ulcer (2.56 per 1,000; 95% CI: 2.35 to 2.80) both occurred in retired patients. Venous leg ulcer, non-healing surgical wounds and other ulcer were most common in agricultural labourers (0.34 per 1,000; 95% CI: 0.31 to 0.36), office clerks (1.47 per 1,000; 95% CI: 1.26 to 1.73), and freelancers (0.78 per 1,000; 95% CI: 0.63 to 0.98), respectively.

[Insert Figure 1 about here]

### Disease burden

Table 4 shows the central tendency and dispersion of per capita hospital LOS and medical costs for inpatients whose principal diagnosis was a complex wound. The median per capita LOS was 12 days (IQR: 7 to 22), which is significantly longer than the median per capita LOS for all inpatient in Sichuan (median: 7 days; IQR: 4 to 10;  $P < 0.001$ ). The median per capita medical cost for people with a complex wound was 6,500.18 CNY (IQR: 2,965.92 to 1,2975.23); nearly double the care costs of inpatients without complex wounds (median: 3,337.16; IQR: 1,759.02; 6,703.08;  $P < 0.001$ ). Patients with a principal diagnosis of pressure ulcer had the longest LOS (median: 20 days; IQR: 9 to 34). The median per capita LOS for patients whose principal diagnosis was diabetic ulcer, venous leg ulcer, surgical ulcer or other ulcer were 13 days (IQR: 7 to 22), 9 days (IQR: 7 to 14), 11 days (IQR: 7 to 20) and 13 days (IQR: 7 to 24) respectively ( $P < 0.001$ ). Diabetic ulcers costed the most among all types of complex wounds in this study, with a median per capita medical expense of 8,399.13 CNY (IQR: 3,435.24 to 16,267.55) followed by pressure ulcers (median: 8,039.12; IQR: 3,693.78 to 17,022.96) ( $P < 0.001$ ).

[Insert Table 4 about here]

Table 5 shows the comorbidity of inpatients included in this study. People with complex wounds averagely have higher Charlson Index (more serious comorbidities) than people without at 1.87 compared with 0.82 ( $P < 0.001$ ). People with diabetic ulcers have the most serious comorbidities (Charlson Index: 3.08), followed by people with pressure ulcers (Charlson Index: 2.38), as compared with people having other complex wounds or without any complex wounds.

[Insert Table 5 about here]

For patients with a complex wound which was not considered the main cause of hospitalization, controlling other confounders, the LOS was on average 47.7% ( $\exp(0.39)-1$ ) longer than the LOS for patients without complex wounds (first column of Table 6); the inpatient medical cost was also 60.0% ( $\exp(0.47)-1$ ) higher on average (second column of Table 6). Compared with patients without complex wounds, the presence of a complex wound was associated with increased LOS and increased costs. After controlling for severity of comorbidities and other confounders, we found people with non-healing surgical wounds alongside another main reason for hospital admission had the longest LOS and highest costs:

with a LOS 155.7% ( $\exp(0.939)-1$ ) higher and inpatient cost 124.8% ( $\exp(0.81)-1$ ) greater compared with those without complex wounds or with other types of complex wounds (pressure ulcers, venous leg ulcers or other ulcers) (the third and fourth column of Table 6).

[Insert Table 6 about here]

## DISCUSSION

Complex wounds are a challenging public health problem.<sup>25</sup> In this study, we used three months of hospital discharge data from Sichuan province, China, and included all the healthcare institutions providing inpatient service in 2018. Our aim was to acquire more reliable estimates of the complex wound disease burden for inpatients. To identify patients with complex wounds more accurately, disease diagnosis and ICD-10 were used simultaneously.

This study discovered that the point prevalence of complex wounds among inpatients was 4.07 per 1,000, which is much higher than the earlier estimate from the 17 tertiary hospitals in China (1.69 per 1,000 inpatients).<sup>17</sup> Pressure ulcers were found to be the most common type of complex wound; similar to the result of an Irish study focusing on community care setting,<sup>26</sup> a two-week cross sectional survey in Leeds,<sup>1</sup> and Dutch study focusing on nursing homes.<sup>5</sup> Our point prevalence estimate of pressure ulcers among inpatients (1.47 per 1,000) is much lower than that of Indonesian inpatients (8.0%), and German inpatients (2.25%).<sup>27,28</sup> Assuming all patients with complex wounds got inpatient service from healthcare institutions, we have crudely estimated the point prevalence of complex wounds among community-based population in Sichuan (0.19 per 1,000). This rate is significantly lower than the estimates in previous studies which ranging from 0.04% to 1%.<sup>25</sup>

Many studies have previously shown that the prevalence of complex wounds is higher in older people<sup>1,4,29</sup>, and our point prevalence rates of most complex wounds (including pressure ulcers, diabetic and other ulcers) are consistent with the highest rates occurring in age 90+ age group. It is worth noting that the highest rates of venous leg ulcers and non-healing surgical wounds occurred in age 60-69 and 50-59 groups respectively. For non-healing surgical wounds, this may due to the preference of conservative treatment for elderly population in China. For venous leg ulcers, the reason of this point prevalence peak in this age group requires further investigation.

This study also found that females have lower rates of complex wounds in China than males, which is consistent with previous study conducted in China and Slovenia,<sup>4,16,17</sup> but different from the UK<sup>1,10</sup> – which showed that females are more likely to suffer from complex wounds.<sup>30</sup> The difference may be partially explained by differences in occupational and lifestyle activities with heavy labour and activities such as smoking being more common in older men than women of the same age. Due to rapidly improving working environments and other risk factor related activities there may be a shift in these gender differences for wound point prevalence over subsequent generations. .

This study found that where complex wounds was the major reason for hospital admission people had a significantly longer hospital LOS and higher medical costs than for all-cause admission in Sichuan. This is the first investigation of this kind in China. For patients who were admitted to health care institutions mainly for pressure ulcer, the LOS was longer than other complex wounds. Pressure ulcers often occur in people with limited mobility due to

1  
2  
3 physical or cognitive impairment, and people with pressure ulcers were more likely to have  
4 serious co-morbidities. The relatively poor psychological, behavioral and cognitive status of  
5 these patients may prolong the treatment period. The longest LOS may also partially explain  
6 why the median of per capita medical expense for those admitted with a pressure ulcer is higher  
7 than for people being admitted for most other types of complex wounds. Among all the  
8 complex wound types in this study, people with diabetes and one or more ulcers incurred the  
9 most medical costs with a median per capita medical expense of 8,399.13 CNY. Again these  
10 were people commonly affected by a range of other co-morbidities and who also required the  
11 use of blood glucose controlling drugs. Considering that the average yearly disposable income  
12 of Sichuan province is 20,580 CNY, this is a significant economic pressure to these patients.  
13 Median medical costs show similar trends, while differences between median and average costs  
14 likely reflects different basic costs of them. We also found that LOS and costs for people with  
15 complex wounds for whom this was not their principal diagnosis were higher when compared  
16 with patients without complex wounds. These data provide us a scope for further in-depth  
17 investigation and a hint for designing better prevention and financial support system for  
18 patients in China.  
19  
20  
21  
22  
23  
24

### 25 **Strengths and limitations**

26 This geographically defined study is the first to report the prevalence of complex wounds in  
27 inpatients in China using data from all health care institutions providing inpatient services  
28 during the study period. It is also the first to quantify disease burden of complex wounds in  
29 China. Both disease code (ICD-10) and disease diagnosis were used to make sure that complex  
30 wounds were correctly identified and classified.  
31  
32

33 This study also had some limitations. The estimates of prevalence may be underestimated.  
34 When estimating the prevalence of complex wounds for inpatients, this study was unable to  
35 identify the patients who may have had complex wounds that were not recorded in discharge  
36 records. This is also the case for patients with certain other illnesses or systematic problems,  
37 which may contribute to increased medical costs due to their links to the wounds. The point  
38 prevalence of complex wounds for the whole population in Sichuan does not capture the  
39 information of people who may have complex wounds but receive care at outpatient sectors  
40 or/and do not receive inpatient care during the study period but are “self-treating”. Besides,  
41 basing on hospital discharge data, we were unable to identify whether the wounds were hospital  
42 acquired or pre-existed, we may have ignored the heterogeneity between these two conditions  
43 when measuring the effect of complex wounds on LOS and costs. Further research in this area  
44 could pay attention to these problems.  
45  
46  
47  
48  
49

### 50 **Contributors**

51 ZL and JP conceived the idea and design for this study; ZL and QJ were responsible for data  
52 analysis; JP, JD and NC contributed to data analysis; QJ created the original draft of this  
53 manuscript. All authors contributed to the interpretation of the findings, critical version of the  
54 manuscript.  
55  
56

### 57 **Competing interests**

58 The authors declare that they have no competing financial interests.  
59  
60

## Funding

This study was funded by Sichuan Science and Technology Program (2019JDJQ0028).

## Data sharing statement

Data may be obtained from a third party and are not publicly available.

## Acknowledgements

The authors are grateful to Health Information Centre of Sichuan Province for providing data.

## Ethical approval

Not applicable since the data we used was administrative data without involving any private information of patients, e.g. the patients' name, ID number.

## Open access

This is an open access article distributed in accordance with the Creative Commons Attribution-Non Commercial 4.0 International license (CC BY-NC 4.0), which permits others to distribute, remix, adapt, build upon this work non-commercially, and license their derivative works on different terms, provided the original work is properly cited, appropriate credit is given, any changes made indicated, and the use is non-commercial. See: <http://creativecommons.org/licenses/by-nc/4.0/>.

## REFERENCE

1. Hall J, Buckley HL, Lamb KA, et al. Point prevalence of complex wounds in a defined United Kingdom population: Point prevalence of complex wounds. *Wound Repair Regen.* 2014;22(6):694-700. doi:10.1111/wrr.12230
2. Jiang Y, Xia L, Jia L, Fu X. Survey of Wound-Healing Centers and Wound Care Units in China. *Int J Low Extrem Wounds.* 2016;15(3):274-279. doi:10.1177/1534734614568667
3. Han G, Ceilley R. Chronic Wound Healing: A Review of Current Management and Treatments. *Adv Ther.* 2017;34(3):599-610. doi:10.1007/s12325-017-0478-y
4. Paden L, Griffiths J, Cullum N. A cross-sectional survey of patients with open surgical wounds in Slovenia. *Health Soc Care Community.* December 2018:hsc.12700. doi:10.1111/hsc.12700
5. Rondas AA, Schols JM, Stobberingh EE, Halfens RJ. Prevalence of chronic wounds and structural quality indicators of chronic wound care in Dutch nursing homes. *Int Wound J.* 2015;12(6):630-635. doi:10.1111/iwj.12172
6. Lindholm C, Bergsten A, Berglund E. Chronic wounds and nursing care. *J Wound Care.* 1999;8(1):5-10. doi:10.12968/jowc.1999.8.1.25828
7. Viswanathan V. Epidemiology of Diabetic Foot and Management of Foot Problems in India. *Int J Low Extrem Wounds.* 2010;9(3):122-126. doi:10.1177/1534734610380026
8. Hansson C, Andersson E, Swanbeck G. A follow-up study of leg and foot ulcer patients. *Acta Derm Venereol.* 1987;67(6):496-500.
9. Gibbons GW, Orgill DP, Serena TE, et al. A Prospective, Randomized, Controlled Trial Comparing the Effects of Noncontact, Low-frequency Ultrasound to Standard Care in Healing Venous Leg Ulcers. *Ostomy Wound Manage.* 2015;61(1):16-29.
10. Gray TA, Rhodes S, Atkinson RA, et al. Opportunities for better value wound care: a

- multiservice, cross-sectional survey of complex wounds and their care in a UK community population. *BMJ Open*. 2018;8(3):e019440. doi:10.1136/bmjopen-2017-019440
11. Pokorná A, Leaper D. Assessment and documentation of non-healing, chronic wounds in inpatient health care facilities in the Czech Republic: an evaluation study. *Int Wound J*. 2015;12(2):224-231. doi:10.1111/iwj.12372
  12. Sen CK, Gordillo GM, Roy S, et al. Human skin wounds: A major and snowballing threat to public health and the economy. *Wound Repair Regen*. 2009;17(6):763-771. doi:10.1111/j.1524-475X.2009.00543.x
  13. Gottrup F. A specialized wound-healing center concept: importance of a multidisciplinary department structure and surgical treatment facilities in the treatment of chronic wounds. *Am J Surg*. 2004;187(5):S38-S43. doi:10.1016/S0002-9610(03)00303-9
  14. Rodrigues I, Mégie M-F. Prevalence of Chronic Wounds in Quebec Home Care: An Exploratory Study. *Ostomy Wound Manage*. 2006;52(5):46-57.
  15. Heyer K, Herberger K, Protz K, Glaeske G, Augustin M. Epidemiology of chronic wounds in Germany: Analysis of statutory health insurance data. *Wound Repair Regen*. 2016;24(2):434-442. doi:10.1111/wrr.12387
  16. Fu X, Sheng Z, Cherry GW, Li Q. Epidemiological study of chronic dermal ulcers in China. *Wound Repair Regen*. 1998;6(1):21-27. doi:10.1046/j.1524-475X.1998.60105.x
  17. Jiang Y, Huang S, Fu X, et al. Epidemiology of chronic cutaneous wounds in China: Epidemiology of chronic wounds in China. *Wound Repair Regen*. 2011;19(2):181-188. doi:10.1111/j.1524-475X.2010.00666.x
  18. Wang X, Yang H, Duan Z, Pan J. Spatial accessibility of primary health care in China: A case study in Sichuan Province. *Soc Sci Med*. 2018;209:14-24. doi:10.1016/j.socscimed.2018.05.023
  19. Keqiang L. Deepen health care reform continuously and promote the establishment of the health care system that suits China's national conditions and benefits all people. [http://www.gov.cn/ldhd/2011-11/17/content\\_1995480.htm](http://www.gov.cn/ldhd/2011-11/17/content_1995480.htm).
  20. Pan J, Shallcross D. Geographic distribution of hospital beds throughout China: a county-level econometric analysis. *Int J Equity Health*. 2016;15(1):179. doi:10.1186/s12939-016-0467-9
  21. Wang X, Pan J. Assessing the disparity in spatial access to hospital care in ethnic minority region in Sichuan Province, China. *BMC Health Serv Res*. 2016;16(1):399. doi:10.1186/s12913-016-1643-8
  22. Raetz JGM, Wick KH. Common Questions About Pressure Ulcers. *Am Fam Physician*. 2015;92(10):888-894.
  23. National Bureau of Statistics of China. National Data by Province. 2018. <http://data.stats.gov.cn/easyquery.htm?cn=E0103&zb=A030801&reg=510000&sj=2018>.
  24. Sundararajan V, Henderson T, Perry C, Muggivan A, Quan H, Ghali WA. New ICD-10 version of the Charlson comorbidity index predicted in-hospital mortality. *J Clin Epidemiol*. 2004;57(12):1288-1294. doi:10.1016/j.jclinepi.2004.03.012
  25. Martinengo L, Olsson M, Bajpai R, et al. Prevalence of chronic wounds in the general population: systematic review and meta-analysis of observational studies. *Ann Epidemiol*. 2019;29:8-15. doi:10.1016/j.annepidem.2018.10.005
  26. McDermott-Scales L, Cowman S, Gethin G. Prevalence of wounds in a community care setting in Ireland. *J Wound Care*. 2009;18(10):405-417.
  27. Amir Y, Lohrmann C, Halfens RJ, Schols JM. Pressure ulcers in four Indonesian hospitals: prevalence, patient characteristics, ulcer characteristics, prevention and treatment: Pressure ulcers in four Indonesian hospitals. *Int Wound J*. 2017;14(1):184-193. doi:10.1111/iwj.12580

- 1
  - 2
  - 3
  - 4
  - 5
  - 6
  - 7
  - 8
  - 9
  - 10
  - 11
  - 12
  - 13
  - 14
  - 15
  - 16
  - 17
  - 18
  - 19
  - 20
  - 21
  - 22
  - 23
  - 24
  - 25
  - 26
  - 27
  - 28
  - 29
  - 30
  - 31
  - 32
  - 33
  - 34
  - 35
  - 36
  - 37
  - 38
  - 39
  - 40
  - 41
  - 42
  - 43
  - 44
  - 45
  - 46
  - 47
  - 48
  - 49
  - 50
  - 51
  - 52
  - 53
  - 54
  - 55
  - 56
  - 57
  - 58
  - 59
  - 60
28. Kröger K, Niebel W, Maier I, Stausberg J, Gerber V, Schwarzkopf A. Prevalence of Pressure Ulcers in Hospitalized Patients in Germany in 2005: Data from the Federal Statistical Office. *Gerontology*. 2009;55(3):281-287. doi:10.1159/000174825
29. Wicke C, Bachinger A, Coerper S, Beckert S, Witte MB, Königsrainer A. Aging influences wound healing in patients with chronic lower extremity wounds treated in a specialized wound care center. *Wound Repair Regen*. 2009;17(1):25-33. doi:10.1111/j.1524-475X.2008.00438.x
30. Agale SV. Chronic Leg Ulcers: Epidemiology, Aetiopathogenesis, and Management. *Ulcers*. 2013;2013:1-9. doi:10.1155/2013/413604

For peer review only

**Table 1.** ICD-10 classification associated with complex wounds

| Wound types                | Identifying methods                                                                                                                                                                                                                                       |
|----------------------------|-----------------------------------------------------------------------------------------------------------------------------------------------------------------------------------------------------------------------------------------------------------|
| Pressure ulcer             | Code L89.-, excepting grade one pressure ulcer coded L89.000                                                                                                                                                                                              |
| Diabetic ulcer             | 1) code E10.504, E11.504, E14.501, E10.505, E11.505<br>2) code E11.502 with the corresponding diagnosis containing “gangrene”<br>3) E14.606, E11.601, E11.503, E10.503, BD54 excepting these whose Wagner classification is level zero.<br>1) or 2) or 3) |
| Venous leg ulcer           | Code I83.0-, I83.2-                                                                                                                                                                                                                                       |
| Non-healing surgical wound | 1) code T81.3-<br>2) code T81.4- excepting biliary tract infection after surgery coded T81.404<br>3) code T81.8- excepting abdominal pain after surgery<br>1) or 2) or 3)                                                                                 |
| Other ulcer                | Code L97.-, L98.4-, R02, T87.4-, T87.5-                                                                                                                                                                                                                   |



**Table 2.** Wounds point prevalence estimates by wounds type

| Wounds type                                                       | Frequency | Point prevalence<br>per 1,000 | 95% CI       |
|-------------------------------------------------------------------|-----------|-------------------------------|--------------|
| <i>Inpatient point prevalence<sup>a</sup></i>                     |           |                               |              |
| All Wounds                                                        | 16,426    | 4.07                          | (4.01, 4.13) |
| Pressure ulcers                                                   | 5,915     | 1.47                          | (1.43, 1.50) |
| Diabetic ulcers                                                   | 3,269     | 0.81                          | (0.78, 0.84) |
| Venous leg ulcers                                                 | 1,139     | 0.28                          | (0.27, 0.30) |
| Non-healing surgical wounds                                       | 4,090     | 1.01                          | (0.98, 1.05) |
| Other ulcer                                                       | 2,013     | 0.50                          | (0.48, 0.52) |
| <i>Point prevalence in community-based population<sup>b</sup></i> |           |                               |              |
| All Wounds                                                        | 16,086    | 0.19                          | (0.19, 0.20) |
| Pressure ulcers                                                   | 5,842     | 0.07                          | (0.07, 0.07) |
| Diabetic ulcers                                                   | 3,230     | 0.04                          | (0.04, 0.04) |
| Venous leg ulcers                                                 | 1,116     | 0.01                          | (0.01, 0.01) |
| Non-healing surgical wounds                                       | 3,936     | 0.05                          | (0.05, 0.05) |
| Other ulcers                                                      | 1,962     | 0.02                          | (0.02, 0.03) |

<sup>a</sup>. Using the total number of inpatient in Sichuan province during the fourth quarter of calendar year 2018 as denominator.

<sup>b</sup>. Using inpatients who were living in Sichuan at present and have at least one wounds we defined as the numerator and the population of Sichuan in 2018 as the denominator.

**Table 3.** Inpatient wounds point prevalence estimates by demographic characteristics

| Variable                     | Patients with wounds | Total patients | Point prevalence per 1,000 <sup>a</sup> | 95% CI         |
|------------------------------|----------------------|----------------|-----------------------------------------|----------------|
| <i>Age group<sup>b</sup></i> |                      |                |                                         |                |
| 0-9                          | 95                   | 423,706        | 0.22                                    | (0.18, 0.27)   |
| 10-19                        | 171                  | 98,270         | 1.74                                    | (1.50, 2.02)   |
| 20-29                        | 462                  | 293,458        | 1.57                                    | (1.44, 1.72)   |
| 30-39                        | 584                  | 281,722        | 2.07                                    | (1.91, 2.25)   |
| 40-49                        | 1,569                | 480,648        | 3.26                                    | (3.12, 3.43)   |
| 50-59                        | 2,489                | 571,865        | 4.35                                    | (4.19, 4.53)   |
| 60-69                        | 3,763                | 835,686        | 4.50                                    | (4.36, 4.65)   |
| 70-79                        | 3,885                | 715,667        | 5.43                                    | (5.26, 5.60)   |
| 80-89                        | 2,825                | 299,432        | 9.44                                    | (9.10, 9.79)   |
| 90+                          | 583                  | 33,309         | 17.50                                   | (16.15, 18.97) |
| <i>Gender</i>                |                      |                |                                         |                |
| Male                         | 9,676                | 1,916,399      | 5.05                                    | (4.95, 5.15)   |
| Female                       | 6,746                | 2,114,331      | 3.19                                    | (3.12, 3.27)   |
| Missing                      | 4                    | 3,033          | 1.32                                    | (0.51, 3.39)   |
| <i>Ethnic Group</i>          |                      |                |                                         |                |
| Minority                     | 471                  | 206,921        | 2.28                                    | (2.08, 2.49)   |
| Han                          | 15,955               | 3,826,844      | 4.17                                    | (4.11, 4.23)   |
| <i>Occupation</i>            |                      |                |                                         |                |
| Civil servants & active army | 88                   | 20,341         | 4.33                                    | (3.51, 5.33)   |
| Professionals & technical    | 96                   | 33,195         | 2.89                                    | (2.37, 3.53)   |
| Office clerk & manager       | 347                  | 103,284        | 3.36                                    | (3.03, 3.73)   |
| Worker                       | 356                  | 82,198         | 4.33                                    | (3.91, 4.80)   |
| Agricultural labourer        | 6,284                | 1,816,499      | 3.46                                    | (3.38, 3.55)   |
| Student                      | 133                  | 103,659        | 1.28                                    | (1.08, 1.52)   |
| Freelancer                   | 427                  | 98,469         | 4.34                                    | (3.95, 4.77)   |
| Self-employed                | 63                   | 19,021         | 3.31                                    | (2.59, 4.24)   |
| Unemployed                   | 491                  | 124,972        | 3.93                                    | (3.60, 4.29)   |
| Retired                      | 1,934                | 188,829        | 10.24                                   | (9.80, 10.71)  |
| Others                       | 6,207                | 1,443,296      | 4.30                                    | (4.20, 4.41)   |

<sup>a</sup>. Using the total number of inpatient people in Sichuan province during the fourth quarter of calendar year 2018.

<sup>b</sup>. Continuous variable was transferred to 10-year age categories manually.

**Table 4.** Disease burden of complex wounds

| Wounds type                 | Frequency <sup>a</sup> | LOS (days) <sup>b</sup> |               | Per capita inpatient cost (CNY) <sup>b</sup> |                                   |
|-----------------------------|------------------------|-------------------------|---------------|----------------------------------------------|-----------------------------------|
|                             |                        | Mean± SD                | Median (IQR)  | Mean± SD                                     | Median (IQR)                      |
| All wounds                  | 5,048                  | 18± 22                  | 12<br>(7; 22) | 11,347.54± 16,715.62                         | 6,500.18<br>(2,965.92; 1,2975.23) |
| Pressure ulcers             | 583                    | 31± 41                  | 20<br>(9; 34) | 15,852.69± 23,630.01                         | 8,039.12<br>(3,693.78; 17,022.99) |
| Diabetic ulcers             | 843                    | 18± 23                  | 13<br>(7; 22) | 13,528.74± 17,966.84                         | 8,399.13<br>(3,435.24; 16,267.55) |
| Venous leg ulcers           | 903                    | 12± 8                   | 9<br>(7; 14)  | 8,865.53± 6,866.72                           | 7,496.02<br>(4,063.37; 11,388.46) |
| Non-healing surgical wounds | 1,639                  | 16± 17                  | 11<br>(7; 20) | 10,071.35± 15,240.53                         | 4,954.22<br>(2,316.53; 10,774.30) |
| Other ulcers                | 1,080                  | 18± 19                  | 13<br>(7; 24) | 11,225.03± 18,425.64                         | 6,152.69<br>(3,011.88; 13,719.34) |

<sup>a</sup> Only patient whose principal cause of hospitalization was the complex wound were included in this table.

<sup>b</sup> mean with standard deviation (SD) and median with inter-quantile range (IQR) were presented.

**Table 5.** Comorbidities of people with complex wounds

| Group                           | Charlson Index |              |
|---------------------------------|----------------|--------------|
|                                 | Mean±SD        | Median (IQR) |
| Patients without complex wounds | 0.82±1.29      | 0 (0;1)      |
| Patients with complex wounds    | 1.87±1.93      | 1 (0;3)      |
| Pressure ulcers                 | 2.38±1.86      | 2 (1;3)      |
| Diabetic ulcers                 | 3.08±1.97      | 3 (1;4)      |
| Venous leg ulcers               | 0.51±1.03      | 0 (0;1)      |
| Non-healing surgical wounds     | 0.91±1.46      | 0 (0;2)      |
| Other ulcers                    | 1.17±1.58      | 1 (0;2)      |

For peer review only

**Table 6.** Two-level hierarchical model results

| Explaining variables                                    | Dependent variable |                   |                   |                   |
|---------------------------------------------------------|--------------------|-------------------|-------------------|-------------------|
|                                                         | log(LOS)           | log(expense)      | log(LOS)          | log(expense)      |
|                                                         | (1)                | (2)               | (3)               | (4)               |
| Complex wounds ( <i>vs NO</i> )                         | 0.39***<br>(0.01)  | 0.47***<br>(0.01) |                   |                   |
| <i>Wounds type (vs patients without complex wounds)</i> |                    |                   |                   |                   |
| Pressure ulcers                                         |                    |                   | 0.23***<br>(0.01) | 0.48***<br>(0.01) |
| Diabetic ulcers                                         |                    |                   | 0.18***<br>(0.01) | 0.19***<br>(0.01) |
| Venous leg ulcers                                       |                    |                   | 0.27***<br>(0.04) | 0.14**<br>(0.04)  |
| Non-healing surgical wounds                             |                    |                   | 0.94***<br>(0.01) | 0.81***<br>(0.01) |
| Other ulcers                                            |                    |                   | 0.38***<br>(0.02) | 0.33***<br>(0.02) |
| Observations <sup>a</sup>                               | 4,021,677          | 4,021,677         | 4,021,677         | 4,021,677         |

Note: Cells contain coefficient (and standard error). \*p <0.05, \*\*p<0.01, \*\*\*p<0.001. All models had adjusted for patient's age (continuous, years), gender (male, female or missing), occupation (11 categories: Civil Servants & active army, professionals & technical, office clerk & manager, worker, agricultural labourer, student, freelancer, self-employed, unemployed, retired, others), social insurance program (four categories: Urban Employee Basic Medical Insurance, Urban Resident Basic Medical Insurance, New Rural Cooperative System), whether or not surgery was required (yes or no), Charlson Index (continuous, adjusting for comorbidity), health care institution level (six categories: primary hospitals, secondary hospitals, tertiary hospitals, unassigned hospitals, primary health care sectors, other providers) and ownership type (public or private). The full results were displayed in table A2 in appendix.

a. Only patients whose principal cause of hospitalization was not complex wound were selected to fit the two-level hierarchical models.

1  
2  
3 **Figure 1.** Inpatient wounds point prevalence estimates by wound types and  
4 demographic characteristics  
5

6 *Note:* Point estimates with 95% confidence intervals were displayed in this figure. Occupation 1:  
7 Civil Servants and active army; 2: Professionals and technical; 3: Office clerk and manager; 4:  
8 Worker; 5: Farmer; 6: Student; 7: Freelancer; 8: Self-employed; 9: Unemployed; 10: Retired; 11:  
9 Others. Exact data was showed in table A1 in appendix.  
10  
11  
12  
13  
14  
15  
16  
17  
18  
19  
20  
21  
22  
23  
24  
25  
26  
27  
28  
29  
30  
31  
32  
33  
34  
35  
36  
37  
38  
39  
40  
41  
42  
43  
44  
45  
46  
47  
48  
49  
50  
51  
52  
53  
54  
55  
56  
57  
58  
59  
60

For peer review only

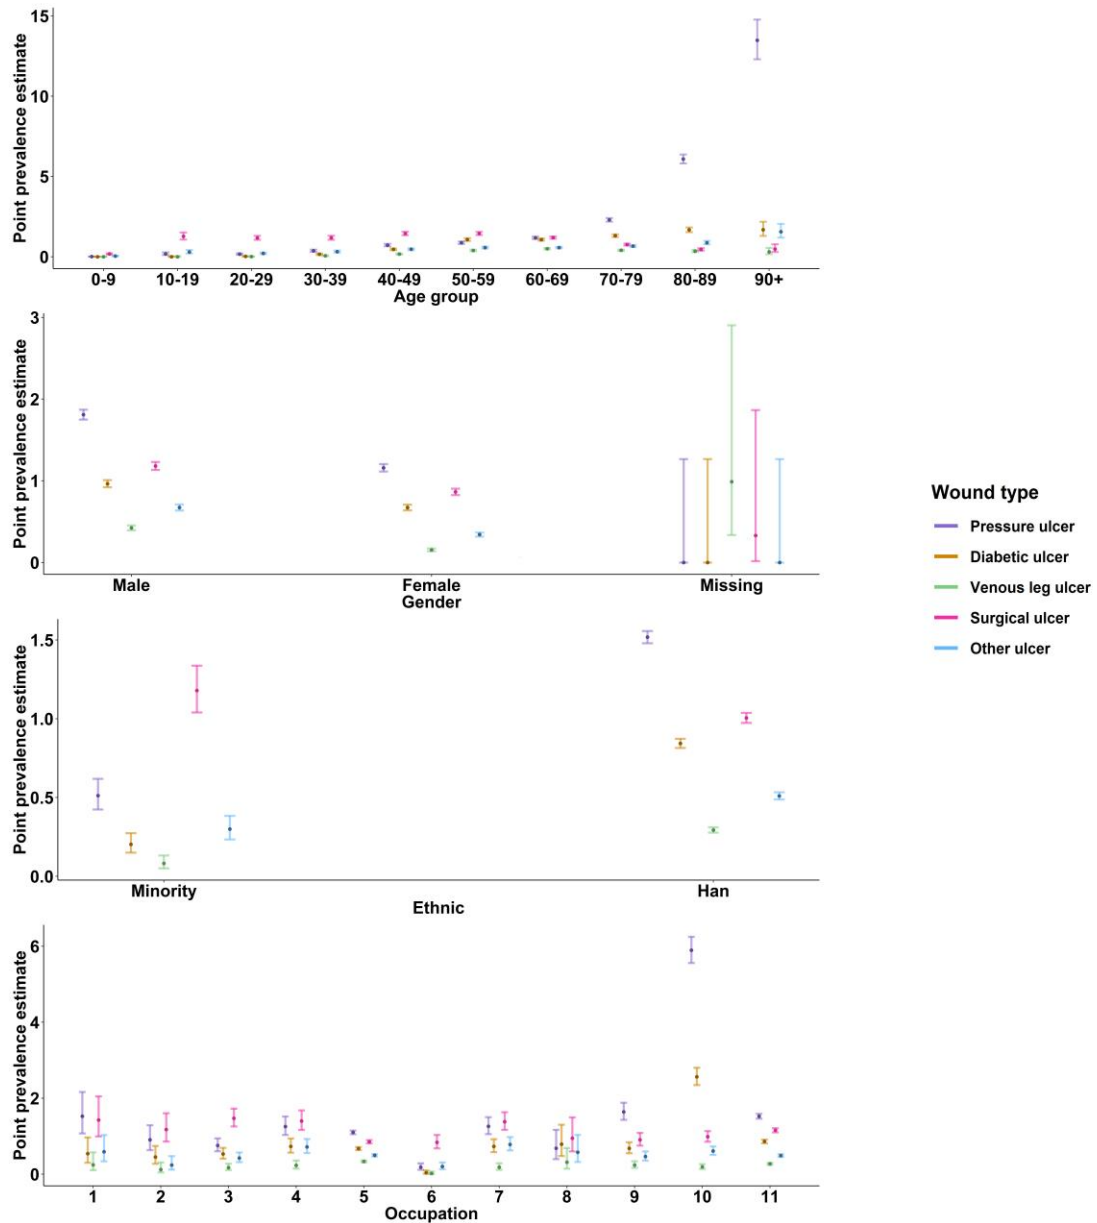

**Figure 1.** Inpatient wounds point prevalence estimates by wound types and demographic characteristics

*Note:* Point estimates with 95% confidence intervals were displayed in this figure. Occupation 1: Civil Servants and active army; 2: Professionals and technical; 3: Office clerk and manager; 4: Worker; 5: Farmer; 6: Student; 7: Freelancer; 8: Self-employed; 9: Unemployed; 10: Retired; 11: Others. Exact data was showed in table A1 in appendix.

## APPENDIX

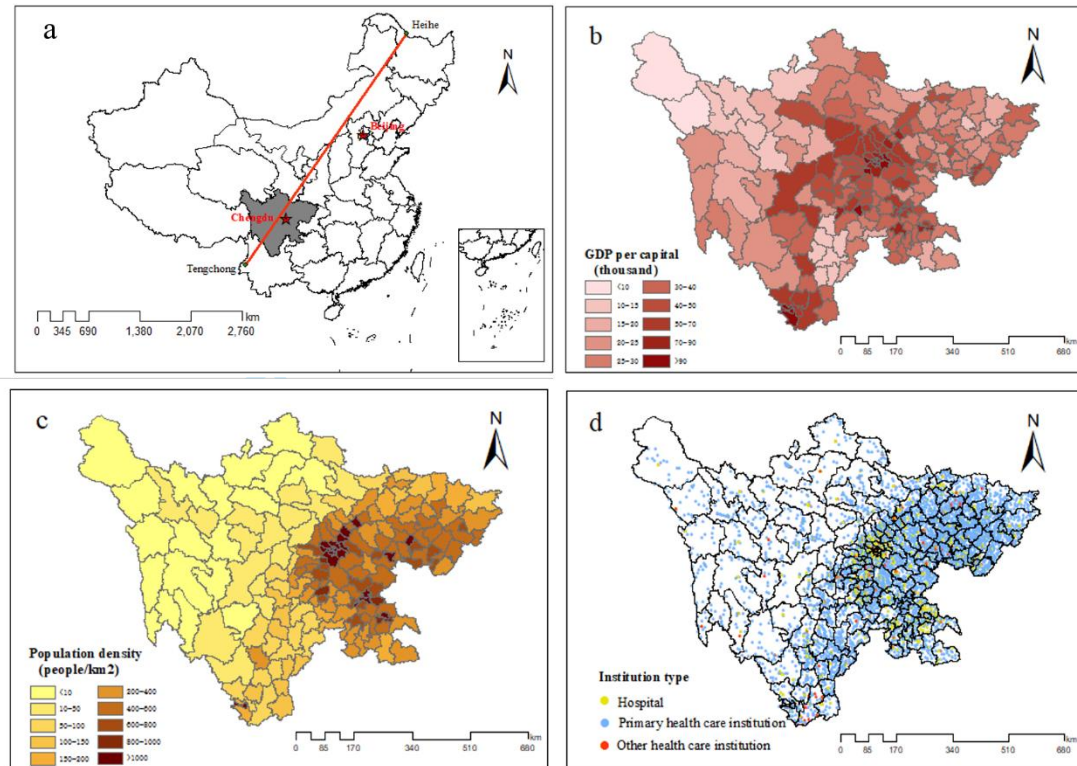

**Figure A1.** Characters of Sichuan province.

(a) Geographic position of Sichuan; (b) Per capita GDP among counties in 2017; (c) Population density among counties in 2017; (d) Distribution of health care institutions in 2018.



**Table A1.** Ghost table for discharge data**Home page of inpatient record**

Year \_\_\_\_\_

Name of Hospital \_\_\_\_\_ (Organization code: □□□□□□□□ - □)

Number of Health Card:

Hospitalization count:

Patient's identification number:

| <b>Name</b> _____ <b>Gender</b> <input type="checkbox"/> 1.M 2. F <b>Birthday</b> _____ <b>Age</b> _____<br><b>Nationality</b> _____ <b>Neonatal birth weight</b> _____ g <b>Neonatal admission weight</b> _____ g<br><b>Birthplace</b> _____ <b>Native place</b> _____ <b>Ethnic group</b> _____<br><b>ID number</b> _____ <b>Occupation</b> _____ <b>Marital status</b> _____<br><b>Present address</b> _____ <b>Tel</b> _____ <b>Post code</b> _____<br><b>Registered address</b> _____ <b>Post code</b> _____<br><b>Work address</b> _____ <b>Office Tel</b> _____ <b>Post code</b> _____<br><b>Contact person</b> _____ <b>Relationship</b> _____ <b>Address</b> _____ <b>Tel</b> _____<br><b>Admission type</b> <input type="checkbox"/> 1. emergency 2. outpatient clinic<br>3. Referred from other institutions and its name is _____ 9. others<br><b>Admission time</b> _____ year _____ month _____ day _____ hour _____ minute<br><b>Hospital department</b> _____ <b>Inpatient ward number</b> _____ <b>The department the patient transferred to is</b> _____<br><b>Discharge time</b> _____ year _____ month _____ day _____ hour _____ minute<br><b>Diagnosis in outpatient (emergency) department</b> _____ <b>ICD-10</b> _____<br><b>Health status at admission</b> <input type="checkbox"/> 1. critically ill 2. acute 3. ordinary<br><b>Diagnosis at admission</b> _____ <b>ICD-10</b> _____ <b>Date of making the principal diagnosis</b> _____<br><b>Whether the patient was critically ill during hospitalization</b> <input type="checkbox"/> 1.yes 2.no |        |                                                                  |                                   |
|---------------------------------------------------------------------------------------------------------------------------------------------------------------------------------------------------------------------------------------------------------------------------------------------------------------------------------------------------------------------------------------------------------------------------------------------------------------------------------------------------------------------------------------------------------------------------------------------------------------------------------------------------------------------------------------------------------------------------------------------------------------------------------------------------------------------------------------------------------------------------------------------------------------------------------------------------------------------------------------------------------------------------------------------------------------------------------------------------------------------------------------------------------------------------------------------------------------------------------------------------------------------------------------------------------------------------------------------------------------------------------------------------------------------------------------------------------------------------------------------------------------------------------------------------------------------------------|--------|------------------------------------------------------------------|-----------------------------------|
| Diagnosis on Discharge                                                                                                                                                                                                                                                                                                                                                                                                                                                                                                                                                                                                                                                                                                                                                                                                                                                                                                                                                                                                                                                                                                                                                                                                                                                                                                                                                                                                                                                                                                                                                          | ICD-10 | Disease status at admission (DSA)                                | Disease status on discharge (DSD) |
| Principal diagnosis:                                                                                                                                                                                                                                                                                                                                                                                                                                                                                                                                                                                                                                                                                                                                                                                                                                                                                                                                                                                                                                                                                                                                                                                                                                                                                                                                                                                                                                                                                                                                                            |        |                                                                  |                                   |
| Other diagnosis:                                                                                                                                                                                                                                                                                                                                                                                                                                                                                                                                                                                                                                                                                                                                                                                                                                                                                                                                                                                                                                                                                                                                                                                                                                                                                                                                                                                                                                                                                                                                                                |        |                                                                  |                                   |
|                                                                                                                                                                                                                                                                                                                                                                                                                                                                                                                                                                                                                                                                                                                                                                                                                                                                                                                                                                                                                                                                                                                                                                                                                                                                                                                                                                                                                                                                                                                                                                                 |        |                                                                  |                                   |
|                                                                                                                                                                                                                                                                                                                                                                                                                                                                                                                                                                                                                                                                                                                                                                                                                                                                                                                                                                                                                                                                                                                                                                                                                                                                                                                                                                                                                                                                                                                                                                                 |        |                                                                  |                                   |
|                                                                                                                                                                                                                                                                                                                                                                                                                                                                                                                                                                                                                                                                                                                                                                                                                                                                                                                                                                                                                                                                                                                                                                                                                                                                                                                                                                                                                                                                                                                                                                                 |        |                                                                  |                                   |
|                                                                                                                                                                                                                                                                                                                                                                                                                                                                                                                                                                                                                                                                                                                                                                                                                                                                                                                                                                                                                                                                                                                                                                                                                                                                                                                                                                                                                                                                                                                                                                                 |        |                                                                  |                                   |
|                                                                                                                                                                                                                                                                                                                                                                                                                                                                                                                                                                                                                                                                                                                                                                                                                                                                                                                                                                                                                                                                                                                                                                                                                                                                                                                                                                                                                                                                                                                                                                                 |        |                                                                  |                                   |
|                                                                                                                                                                                                                                                                                                                                                                                                                                                                                                                                                                                                                                                                                                                                                                                                                                                                                                                                                                                                                                                                                                                                                                                                                                                                                                                                                                                                                                                                                                                                                                                 |        |                                                                  |                                   |
|                                                                                                                                                                                                                                                                                                                                                                                                                                                                                                                                                                                                                                                                                                                                                                                                                                                                                                                                                                                                                                                                                                                                                                                                                                                                                                                                                                                                                                                                                                                                                                                 |        |                                                                  |                                   |
|                                                                                                                                                                                                                                                                                                                                                                                                                                                                                                                                                                                                                                                                                                                                                                                                                                                                                                                                                                                                                                                                                                                                                                                                                                                                                                                                                                                                                                                                                                                                                                                 |        |                                                                  |                                   |
| <b>DSA:</b> 1.yes 2.clinically undetermined 3.unclear 4.no                                                                                                                                                                                                                                                                                                                                                                                                                                                                                                                                                                                                                                                                                                                                                                                                                                                                                                                                                                                                                                                                                                                                                                                                                                                                                                                                                                                                                                                                                                                      |        | <b>DSD:</b> 1.cured 2.improved 3.not cured 4.deceased 5.others   |                                   |
| <b>Cause of injury/poisoning</b> _____                                                                                                                                                                                                                                                                                                                                                                                                                                                                                                                                                                                                                                                                                                                                                                                                                                                                                                                                                                                                                                                                                                                                                                                                                                                                                                                                                                                                                                                                                                                                          |        | <b>ICD-10</b> _____                                              |                                   |
| <b>pathological diagnosis:</b> _____                                                                                                                                                                                                                                                                                                                                                                                                                                                                                                                                                                                                                                                                                                                                                                                                                                                                                                                                                                                                                                                                                                                                                                                                                                                                                                                                                                                                                                                                                                                                            |        | <b>ICD-10</b> _____ <b>Pathological examination number</b> _____ |                                   |
| <b>TNM stage:</b> <input type="checkbox"/> 1.I 2.II 3.III 4.IV                                                                                                                                                                                                                                                                                                                                                                                                                                                                                                                                                                                                                                                                                                                                                                                                                                                                                                                                                                                                                                                                                                                                                                                                                                                                                                                                                                                                                                                                                                                  |        |                                                                  |                                   |
| <b>drug allergy</b> <input type="checkbox"/> 1.no 2.yes, and the allergic drug is: _____ <b>Autopsy of deceased patient</b> <input type="checkbox"/> 1.yes 2.no                                                                                                                                                                                                                                                                                                                                                                                                                                                                                                                                                                                                                                                                                                                                                                                                                                                                                                                                                                                                                                                                                                                                                                                                                                                                                                                                                                                                                 |        |                                                                  |                                   |
| <b>Blood type</b> <input type="checkbox"/> 1. A 2. B 3. O 4. AB 5. unclear 6. unchecked                                                                                                                                                                                                                                                                                                                                                                                                                                                                                                                                                                                                                                                                                                                                                                                                                                                                                                                                                                                                                                                                                                                                                                                                                                                                                                                                                                                                                                                                                         |        |                                                                  |                                   |
| <b>Rh</b> <input type="checkbox"/> 1. negative 2. positive 3. unclear 4. unchecked                                                                                                                                                                                                                                                                                                                                                                                                                                                                                                                                                                                                                                                                                                                                                                                                                                                                                                                                                                                                                                                                                                                                                                                                                                                                                                                                                                                                                                                                                              |        |                                                                  |                                   |
| <b>Follow up clinic</b> <input type="checkbox"/> 1.yes 2.no                                                                                                                                                                                                                                                                                                                                                                                                                                                                                                                                                                                                                                                                                                                                                                                                                                                                                                                                                                                                                                                                                                                                                                                                                                                                                                                                                                                                                                                                                                                     |        | <b>Follow-up period</b> _____                                    |                                   |

1  
2  
3  
4  
5  
6  
7  
8  
9  
10  
11  
12  
13  
14  
15  
16  
17  
18  
19  
20  
21  
22  
23  
24  
25  
26  
27  
28  
29  
30  
31  
32  
33  
34  
35  
36  
37  
38  
39  
40  
41  
42  
43  
44  
45  
46  
47  
48  
49  
50  
51  
52  
53  
54  
55  
56  
57  
58  
59  
60

Section director's name \_\_\_\_\_ Chief doctor \_\_\_\_\_ Attending doctor \_\_\_\_\_ Visiting staff \_\_\_\_\_  
Resident doctor \_\_\_\_\_ Primary nurse \_\_\_\_\_ Refresher doctor \_\_\_\_\_ Intern \_\_\_\_\_ coder \_\_\_\_\_

The quality of medical record  1. high 2. medium 3. low      Quality control doctors \_\_\_\_\_  
Quality control nurses \_\_\_\_\_      Date of making quality control \_\_\_\_\_

Prophylactic use of antimicrobial drugs for primary surgical incision  1. yes 2. no  
Duration(hours): \_\_\_\_\_ Drug combination  1. yes 2. no

| Surgery code | time | level | Name of the operation | Operating Doctor |             |              | Wound healing grade | anesthesia | Anesthesiologists |
|--------------|------|-------|-----------------------|------------------|-------------|--------------|---------------------|------------|-------------------|
|              |      |       |                       | Operator         | Assistant 1 | Assistant II |                     |            |                   |
|              |      |       |                       |                  |             |              | /                   |            |                   |
|              |      |       |                       |                  |             |              | /                   |            |                   |
|              |      |       |                       |                  |             |              | /                   |            |                   |
|              |      |       |                       |                  |             |              | /                   |            |                   |
|              |      |       |                       |                  |             |              | /                   |            |                   |
|              |      |       |                       |                  |             |              | /                   |            |                   |
|              |      |       |                       |                  |             |              | /                   |            |                   |
|              |      |       |                       |                  |             |              | /                   |            |                   |
|              |      |       |                       |                  |             |              | /                   |            |                   |

Clinical pathway management  1. yes 2. no      Complete clinical pathway  1. yes 2. no, and the reason is \_\_\_\_\_  
Variation  1. yes    2. no; the reason is: \_\_\_\_\_

Discharge type   
1. Discharge on doctor's orders  
2. Be referred to a superior hospital, and its name is \_\_\_\_\_  
3. Be referred to primary health institution(THC/CHC), and its name is \_\_\_\_\_  
4. Leave hospital without medical advice    5. dead    9. others

Does she/he has the plan to be readmitted within 31 days     1. no    2. yes, and the reason is \_\_\_\_\_

How long did the craniocerebral injury patient remain in a coma:  
Before admission, she/he was in coma for \_\_\_\_\_ minutes  
After admission, she/he was in coma for \_\_\_\_\_ minutes

Whether the patient was readmitted for the same disease  1. yes    2. no  
How long has it been since the last discharge? \_\_\_\_\_ days

Inpatient expense (yuan): Total expense \_\_\_\_\_ (out-of-pocket payment: \_\_\_\_\_ others: \_\_\_\_\_)

**1. Comprehensive medical services:**  
(1) General medical service expense: \_\_\_\_\_ (2) General treatment expense: \_\_\_\_\_  
(3) Nursing expense: \_\_\_\_\_ (4) Other expense: \_\_\_\_\_

**2. Diagnosis:** (5) Pathological diagnosis: \_\_\_\_\_ (6) laboratory diagnosis: \_\_\_\_\_  
(7) Imaging diagnosis: \_\_\_\_\_ (8) Clinical diagnosis: \_\_\_\_\_

**3. Treatment:** (9) Non-surgical treatment: \_\_\_\_\_ (Clinical physiotherapy: \_\_\_\_\_)  
(10) Surgical treatment expense: \_\_\_\_\_ (Anesthetic expense: \_\_\_\_\_ Operation: \_\_\_\_\_)

**4. Recovery:** (11) Recovery expense: \_\_\_\_\_

**5. Traditional Chinese treatment:** (12) Traditional Chinese treatment expense: \_\_\_\_\_

**6. Western medicine:** (13) Western medicine expense: \_\_\_\_\_ (Antimicrobial expense: \_\_\_\_\_)

**7. Traditional Chinese medicine (TCM):**  
(14) Proprietary Chinese medicine expense \_\_\_\_\_ (15) Chinese herbal medicine expense: \_\_\_\_\_

**8. Blood and blood products:** (16) Blood expense: \_\_\_\_\_ (17) Albumin products: \_\_\_\_\_  
(18) Globulin products: \_\_\_\_\_ (19) Hemagglutinin sub products: \_\_\_\_\_ (20) Subclass of cytokines: \_\_\_\_\_

**9. Consumable materials:** (21) Disposable medical materials for inspection: \_\_\_\_\_  
(22) Disposable medical materials for treatment: \_\_\_\_\_  
(23) Disposable medical materials for surgery: \_\_\_\_\_

**10. Others:** (24) Other expense: \_\_\_\_\_

**Table A2.** Full results of two-level hierarchical models

| <i>Explaining variables</i>                                          | <i>Dependent variable</i> |                       |                       |                       |
|----------------------------------------------------------------------|---------------------------|-----------------------|-----------------------|-----------------------|
|                                                                      | log(LOS)                  | log(expense)          | log(LOS)              | log(expense)          |
|                                                                      | (1)                       | (2)                   | (3)                   | (4)                   |
| Wounds                                                               | 0.390***<br>(0.006)       | 0.472***<br>(0.006)   |                       |                       |
| <i>Wounds type (vs patients without complex wounds)</i>              |                           |                       |                       |                       |
| Pressure ulcers                                                      |                           |                       | 0.233***<br>(0.009)   | 0.484***<br>(0.009)   |
| Diabetic ulcers                                                      |                           |                       | 0.183***<br>(0.014)   | 0.194***<br>(0.013)   |
| Venous leg ulcers                                                    |                           |                       | 0.268***<br>(0.044)   | 0.137**<br>(0.042)    |
| Non-healing surgical wounds                                          |                           |                       | 0.939***<br>(0.013)   | 0.807***<br>(0.013)   |
| Other ulcers                                                         |                           |                       | 0.380***<br>(0.020)   | 0.333***<br>(0.019)   |
| Age (year)                                                           | 0.003***<br>(0.00002)     | 0.008***<br>(0.00002) | 0.003***<br>(0.00002) | 0.008***<br>(0.00002) |
| <i>Gender (vs male)</i>                                              |                           |                       |                       |                       |
| Female                                                               | -0.061***<br>(0.001)      | -0.056***<br>(0.001)  | -0.061***<br>(0.001)  | -0.056***<br>(0.001)  |
| Missing                                                              | -0.055***<br>(0.015)      | -0.061***<br>(0.014)  | -0.055***<br>(0.015)  | -0.061***<br>(0.014)  |
| Charlson Index                                                       | 0.075***<br>(0.0003)      | 0.116***<br>(0.0003)  | 0.075***<br>(0.0003)  | 0.116***<br>(0.0003)  |
| <i>Social insurance program (vs UEBMI) <sup>a</sup></i>              |                           |                       |                       |                       |
| URBMI                                                                | -0.059***<br>(0.001)      | -0.036***<br>(0.001)  | -0.059***<br>(0.001)  | -0.036***<br>(0.001)  |
| NRCMS                                                                | -0.078***<br>(0.002)      | -0.036***<br>(0.002)  | -0.078***<br>(0.002)  | -0.036***<br>(0.002)  |
| Others                                                               | -0.127***<br>(0.001)      | -0.078***<br>(0.001)  | -0.127***<br>(0.001)  | -0.078***<br>(0.001)  |
| <i>Occupation (vs Civil Servants &amp; active army) <sup>b</sup></i> |                           |                       |                       |                       |
| Professionals & technical                                            | -0.055***<br>(0.006)      | -0.031***<br>(0.006)  | -0.055***<br>(0.006)  | -0.031***<br>(0.006)  |

|    |                                                             |           |           |           |           |  |
|----|-------------------------------------------------------------|-----------|-----------|-----------|-----------|--|
| 1  |                                                             |           |           |           |           |  |
| 2  |                                                             |           |           |           |           |  |
| 3  |                                                             |           |           |           |           |  |
| 4  | Office clerk & manager                                      | -0.057*** | -0.024*** | -0.057*** | -0.024*** |  |
| 5  |                                                             | (0.005)   | (0.005)   | (0.005)   | (0.005)   |  |
| 6  |                                                             |           |           |           |           |  |
| 7  | Worker                                                      | 0.013*    | 0.050***  | 0.013*    | 0.050***  |  |
| 8  |                                                             | (0.005)   | (0.005)   | (0.005)   | (0.005)   |  |
| 9  |                                                             |           |           |           |           |  |
| 10 | Agricultural labor                                          | -0.006    | 0.050***  | -0.006    | 0.050***  |  |
| 11 |                                                             | (0.005)   | (0.005)   | (0.005)   | (0.005)   |  |
| 12 |                                                             |           |           |           |           |  |
| 13 | Student                                                     | -0.051*** | -0.100*** | -0.050*** | -0.100*** |  |
| 14 |                                                             | (0.005)   | (0.005)   | (0.005)   | (0.005)   |  |
| 15 |                                                             |           |           |           |           |  |
| 16 | Freelancer                                                  | -0.057*** | -0.001    | -0.057*** | -0.001    |  |
| 17 |                                                             | (0.005)   | (0.005)   | (0.005)   | (0.005)   |  |
| 18 |                                                             |           |           |           |           |  |
| 19 | Self-employed                                               | -0.051*** | -0.017*   | -0.051*** | -0.017*   |  |
| 20 |                                                             | (0.007)   | (0.007)   | (0.007)   | (0.007)   |  |
| 21 |                                                             |           |           |           |           |  |
| 22 | Unemployed                                                  | -0.048*** | -0.014**  | -0.048*** | -0.014**  |  |
| 23 |                                                             | (0.005)   | (0.005)   | (0.005)   | (0.005)   |  |
| 24 |                                                             |           |           |           |           |  |
| 25 | Retired                                                     | 0.062***  | 0.030***  | 0.062***  | 0.030***  |  |
| 26 |                                                             | (0.005)   | (0.005)   | (0.005)   | (0.005)   |  |
| 27 |                                                             |           |           |           |           |  |
| 28 | Others                                                      | 0.004     | 0.021***  | 0.005     | 0.021***  |  |
| 29 |                                                             | (0.005)   | (0.005)   | (0.005)   | (0.005)   |  |
| 30 |                                                             |           |           |           |           |  |
| 31 |                                                             |           |           |           |           |  |
| 32 |                                                             |           |           |           |           |  |
| 33 |                                                             |           |           |           |           |  |
| 34 | <i>Whether or not surgery was required (vs No)</i>          |           |           |           |           |  |
| 35 | Surgery (Yes)                                               | 0.127***  | 0.714***  | 0.126***  | 0.714***  |  |
| 36 |                                                             | (0.001)   | (0.001)   | (0.001)   | (0.001)   |  |
| 37 |                                                             |           |           |           |           |  |
| 38 | <i>Health care institution levels (vs primary hospital)</i> |           |           |           |           |  |
| 39 |                                                             |           |           |           |           |  |
| 40 | Secondary hospital                                          | 0.067     | 0.443***  | 0.067     | 0.443***  |  |
| 41 |                                                             | (0.035)   | (0.043)   | (0.035)   | (0.043)   |  |
| 42 |                                                             |           |           |           |           |  |
| 43 | Tertiary hospital                                           | -0.190*** | 0.681***  | -0.190*** | 0.681***  |  |
| 44 |                                                             | (0.049)   | (0.061)   | (0.049)   | (0.061)   |  |
| 45 |                                                             |           |           |           |           |  |
| 46 | Unassigned hospital                                         | 0.055     | 0.168***  | 0.055     | 0.168***  |  |
| 47 |                                                             | (0.028)   | (0.035)   | (0.028)   | (0.035)   |  |
| 48 |                                                             |           |           |           |           |  |
| 49 | Primary healthcare sector                                   | -0.456*** | -0.825*** | -0.456*** | -0.825*** |  |
| 50 |                                                             | (0.036)   | (0.045)   | (0.036)   | (0.045)   |  |
| 51 |                                                             |           |           |           |           |  |
| 52 | Other providers                                             | -0.548*** | 0.014     | -0.547*** | 0.014     |  |
| 53 |                                                             | (0.048)   | (0.059)   | (0.048)   | (0.059)   |  |
| 54 |                                                             |           |           |           |           |  |
| 55 |                                                             |           |           |           |           |  |
| 56 | <i>Ownership type (vs private)</i>                          |           |           |           |           |  |
| 57 |                                                             |           |           |           |           |  |
| 58 | Public                                                      | 0.222***  | -0.041    | 0.222***  | -0.041    |  |
| 59 |                                                             | (0.027)   | (0.034)   | (0.027)   | (0.034)   |  |
| 60 |                                                             |           |           |           |           |  |

|              |           |           |           |           |
|--------------|-----------|-----------|-----------|-----------|
| Missing      | 0.171*    | -0.325*** | 0.172*    | -0.325*** |
|              | (0.067)   | (0.083)   | (0.067)   | (0.083)   |
| Constant     | 1.848***  | 7.337***  | 1.848***  | 7.337***  |
|              | (0.025)   | (0.031)   | (0.025)   | (0.031)   |
| Observations | 4,021,677 | 4,021,677 | 4,021,677 | 4,021,677 |

*Note:* Cells contain coefficient (and standard error). \*p <0.05, \*\*p<0.01, \*\*\*p<0.001.

<sup>a</sup>. UEBMI (Urban Employee Basic Medical Insurance); URBMI (Urban Resident Basic Medical Insurance); NRCMS (New Rural Cooperative System).

<sup>b</sup>. Occupations with too small a sample were merged with similar occupations.

For peer review only

**Table A3.** Inpatient wounds point prevalence estimates by wound types and demographic characteristics

| Variable         | Pressure ulcers |                           | Diabetic ulcers |                           | Venous leg ulcers |                           | Non-healing surgical wounds |                           | Other ulcers |                           |
|------------------|-----------------|---------------------------|-----------------|---------------------------|-------------------|---------------------------|-----------------------------|---------------------------|--------------|---------------------------|
|                  | frequency       | point prevalence (95% CI) | frequency       | point prevalence (95% CI) | frequency         | point prevalence (95% CI) | frequency                   | point prevalence (95% CI) | frequency    | point prevalence (95% CI) |
| <i>Age group</i> |                 |                           |                 |                           |                   |                           |                             |                           |              |                           |
| 0-9              | 4               | 0.009<br>(0.004, 0.024)   | 0               | 0.000<br>(0.000, 0.009)   | 0                 | 0.000<br>(0.000, 0.009)   | 73                          | 0.172<br>(0.137, 0.217)   | 18           | 0.042<br>(0.027, 0.067)   |
| 10-19            | 17              | 0.173<br>(0.108, 0.277)   | 0               | 0.000<br>(0.000, 0.039)   | 0                 | 0.000<br>(0.000, 0.039)   | 125                         | 1.272<br>(1.068, 1.515)   | 29           | 0.295<br>(0.205, 0.424)   |
| 20-29            | 48              | 0.164<br>(0.123, 0.217)   | 7               | 0.024<br>(0.012, 0.049)   | 2                 | 0.007<br>(0.002, 0.025)   | 344                         | 1.172<br>(1.055, 1.303)   | 61           | 0.208<br>(0.162, 0.267)   |
| 30-39            | 104             | 0.369<br>(0.305, 0.447)   | 43              | 0.153<br>(0.113, 0.206)   | 17                | 0.060<br>(0.038, 0.097)   | 331                         | 1.175<br>(1.055, 1.308)   | 89           | 0.316<br>(0.257, 0.389)   |
| 40-49            | 347             | 0.722<br>(0.650, 0.802)   | 221             | 0.460<br>(0.403, 0.525)   | 81                | 0.169<br>(0.136, 0.209)   | 695                         | 1.446<br>(1.342, 1.557)   | 225          | 0.468<br>(0.411, 0.533)   |
| 50-59            | 498             | 0.871<br>(0.798, 0.951)   | 611             | 1.068<br>(0.987, 1.157)   | 223               | 0.390<br>(0.342, 0.445)   | 831                         | 1.453<br>(1.358, 1.555)   | 326          | 0.570<br>(0.511, 0.635)   |
| 60-69            | 983             | 1.176<br>(1.105, 1.252)   | 891             | 1.066<br>(0.998, 1.138)   | 415               | 0.497<br>(0.451, 0.547)   | 997                         | 1.193<br>(1.121, 1.269)   | 477          | 0.571<br>(0.522, 0.624)   |
| 70-79            | 1,643           | 2.296<br>(2.188, 2.409)   | 939             | 1.312<br>(1.231, 1.399)   | 287               | 0.401<br>(0.357, 0.45)    | 542                         | 0.757<br>(0.696, 0.824)   | 474          | 0.662<br>(0.605, 0.725)   |
| 80-89            | 1,822           | 6.085<br>(5.813, 6.370)   | 501             | 1.673<br>(1.533, 1.826)   | 104               | 0.347<br>(0.287, 0.421)   | 136                         | 0.454<br>(0.384, 0.537)   | 262          | 0.875<br>(0.775, 0.987)   |

|                              |       |                  |       |                |       |                |       |                |       |                |
|------------------------------|-------|------------------|-------|----------------|-------|----------------|-------|----------------|-------|----------------|
| 90+                          | 449   | 13.480           | 56    | 1.681          | 10    | 0.300          | 16    | 0.480          | 52    | 1.561          |
|                              |       | (12.296, 14.776) |       | (1.295, 2.182) |       | (0.163, 0.553) |       | (0.296, 0.780) |       | (1.191, 2.046) |
| <i>Gender</i>                |       |                  |       |                |       |                |       |                |       |                |
| Male                         | 3,466 | 1.809            | 1,848 | 0.964          | 810   | 0.423          | 2,263 | 1.181          | 1,289 | 0.673          |
|                              |       | (1.749, 1.870)   |       | (0.921, 1.009) |       | (0.395, 0.453) |       | (1.133, 1.230) |       | (0.637, 0.710) |
| Female                       | 2,449 | 1.158            | 1,421 | 0.672          | 326   | 0.154          | 1,826 | 0.864          | 724   | 0.342          |
|                              |       | (1.113, 1.205)   |       | (0.638, 0.708) |       | (0.138, 0.172) |       | (0.825, 0.904) |       | (0.318, 0.368) |
| Missing                      | 0     | 0.000            | 0     | 0.000          | 3     | 0.989          | 1     | 0.330          | 0     | 0.000          |
|                              |       | (0.000, 1.265)   |       | (0.000, 1.265) |       | (0.336, 2.904) |       | (0.017, 1.865) |       | (0.000, 1.265) |
| <i>Ethnic group</i>          |       |                  |       |                |       |                |       |                |       |                |
| Minority                     | 106   | 0.512            | 42    | 0.203          | 17    | 0.082          | 244   | 1.179          | 62    | 0.300          |
|                              |       | (0.424, 0.619)   |       | (0.150, 0.274) |       | (0.051, 0.132) |       | (1.040, 1.337) |       | (0.234, 0.384) |
| Han                          | 5,809 | 1.518            | 3,227 | 0.843          | 1,122 | 0.293          | 3,846 | 1.005          | 1,951 | 0.510          |
|                              |       | (1.479, 1.557)   |       | (0.815, 0.873) |       | (0.277, 0.311) |       | (0.974, 1.037) |       | (0.488, 0.533) |
| <i>Occupation</i>            |       |                  |       |                |       |                |       |                |       |                |
| Civil Servants & active army | 31    | 1.524            | 11    | 0.541          | 5     | 0.246          | 29    | 1.426          | 12    | 0.590          |
|                              |       | (1.074, 2.162)   |       | (0.302, 0.968) |       | (0.105, 0.575) |       | (0.993, 2.047) |       | (0.338, 1.031) |
| Professionals & technical    | 30    | 0.904            | 15    | 0.452          | 4     | 0.121          | 39    | 1.175          | 8     | 0.241          |
|                              |       | (0.633, 1.290)   |       | (0.274, 0.745) |       | (0.047, 0.310) |       | (0.86, 1.606)  |       | (0.122, 0.476) |
| Office clerk & manager       | 78    | 0.755            | 55    | 0.533          | 18    | 0.174          | 152   | 1.472          | 44    | 0.426          |
|                              |       | (0.605, 0.942)   |       | (0.409, 0.693) |       | (0.11, 0.275)  |       | (1.256, 1.725) |       | (0.317, 0.572) |
| Worker                       | 103   | 1.253            | 60    | 0.730          | 19    | 0.231          | 115   | 1.399          | 59    | 0.718          |
|                              |       | (1.033, 1.519)   |       | (0.567, 0.939) |       | (0.148, 0.361) |       | (1.166, 1.679) |       | (0.557, 0.926) |
| Agricultural labor           | 1,999 | 1.100            | 1,226 | 0.675          | 608   | 0.335          | 1,549 | 0.853          | 902   | 0.497          |
|                              |       | (1.053, 1.150)   |       | (0.638, 0.714) |       | (0.309, 0.362) |       | (0.811, 0.896) |       | (0.465, 0.53)  |

|               |       |                |       |                |     |                |       |                |     |                |
|---------------|-------|----------------|-------|----------------|-----|----------------|-------|----------------|-----|----------------|
| Student       | 19    | 0.183          | 4     | 0.039          | 2   | 0.019          | 87    | 0.839          | 21  | 0.203          |
|               |       | (0.117, 0.286) |       | (0.015, 0.099) |     | (0.005, 0.07)  |       | (0.681, 1.035) |     | (0.133, 0.31)  |
| Freelancer    | 124   | 1.259          | 72    | 0.731          | 18  | 0.183          | 136   | 1.381          | 77  | 0.782          |
|               |       | (1.056, 1.501) |       | (0.581, 0.921) |     | (0.116, 0.289) |       | (1.168, 1.633) |     | (0.626, 0.977) |
| Self-employed | 13    | 0.683          | 15    | 0.789          | 6   | 0.315          | 18    | 0.946          | 11  | 0.578          |
|               |       | (0.399, 1.169) |       | (0.478, 1.301) |     | (0.145, 0.688) |       | (0.599, 1.495) |     | (0.323, 1.035) |
| Unemployed    | 205   | 1.640          | 85    | 0.680          | 30  | 0.240          | 113   | 0.904          | 58  | 0.464          |
|               |       | (1.431, 1.881) |       | (0.550, 0.841) |     | (0.168, 0.343) |       | (0.752, 1.087) |     | (0.359, 0.600) |
| Retired       | 1,113 | 5.894          | 484   | 2.563          | 36  | 0.191          | 186   | 0.985          | 115 | 0.609          |
|               |       | (5.559, 6.250) |       | (2.345, 2.802) |     | (0.138, 0.264) |       | (0.853, 1.137) |     | (0.507, 0.731) |
| Others        | 2,200 | 1.524          | 1,242 | 0.861          | 393 | 0.272          | 1,666 | 1.154          | 706 | 0.489          |
|               |       | (1.462, 1.589) |       | (0.814, 0.910) |     | (0.247, 0.301) |       | (1.100, 1.211) |     | (0.454, 0.527) |



STROBE Statement—Checklist of items that should be included in reports of *cross-sectional studies*

|                              | Item No | Recommendation                                                                                                                                                                                                                                                                                                                                                                                                                                                 |
|------------------------------|---------|----------------------------------------------------------------------------------------------------------------------------------------------------------------------------------------------------------------------------------------------------------------------------------------------------------------------------------------------------------------------------------------------------------------------------------------------------------------|
| <b>Title and abstract</b>    | 1       | (a) Indicate the study's design with a commonly used term in the title or the abstract<br><b>Yes, Page 2 Line 3 and Line 29.</b><br>(b) Provide in the abstract an informative and balanced summary of what was done and what was found <b>Yes, Page 2 from Line 35 to Line 53.</b>                                                                                                                                                                            |
| <b>Introduction</b>          |         |                                                                                                                                                                                                                                                                                                                                                                                                                                                                |
| Background/rationale         | 2       | Explain the scientific background and rationale for the investigation being reported<br><b>Yes, Page 3 from Line 35 to Line 45.</b>                                                                                                                                                                                                                                                                                                                            |
| Objectives                   | 3       | State specific objectives, including any prespecified hypotheses <b>Yes, Page 3 from Line 45 to Line 50.</b>                                                                                                                                                                                                                                                                                                                                                   |
| <b>Methods</b>               |         |                                                                                                                                                                                                                                                                                                                                                                                                                                                                |
| Study design                 | 4       | Present key elements of study design early in the paper <b>Yes, Page 5 from Line 46-53</b>                                                                                                                                                                                                                                                                                                                                                                     |
| Setting                      | 5       | Describe the setting, locations, and relevant dates, including periods of recruitment, exposure, follow-up, and data collection <b>Yes, Page 5 from line 32-53.</b>                                                                                                                                                                                                                                                                                            |
| Participants                 | 6       | (a) Give the eligibility criteria, and the sources and methods of selection of participants <b>Yes, from Page 5 line 57 to Page 6 line 9.</b>                                                                                                                                                                                                                                                                                                                  |
| Variables                    | 7       | Clearly define all outcomes, exposures, predictors, potential confounders, and effect modifiers. Give diagnostic criteria, if applicable <b>Yes, Page 6 from line 40-52.</b>                                                                                                                                                                                                                                                                                   |
| Data sources/<br>measurement | 8*      | For each variable of interest, give sources of data and details of methods of assessment (measurement). Describe comparability of assessment methods if there is more than one group <b>Yes, Page 6 from line 28-52.</b>                                                                                                                                                                                                                                       |
| Bias                         | 9       | Describe any efforts to address potential sources of bias <b>Yes, Page 6 from line 40-58.</b>                                                                                                                                                                                                                                                                                                                                                                  |
| Study size                   | 10      | Explain how the study size was arrived at <b>Yes, Page 5 from line 46-53.</b>                                                                                                                                                                                                                                                                                                                                                                                  |
| Quantitative variables       | 11      | Explain how quantitative variables were handled in the analyses. If applicable, describe which groupings were chosen and why <b>Yes, Page 6 from line 40-52 and Table 6.</b>                                                                                                                                                                                                                                                                                   |
| Statistical methods          | 12      | (a) Describe all statistical methods, including those used to control for confounding<br><b>Yes, Page 6 line 15-58.</b><br>(b) Describe any methods used to examine subgroups and interactions <b>Yes, Page 6 line 18-40.</b><br>(c) Explain how missing data were addressed <b>Yes, Page 6 line 53-59.</b><br>(d) If applicable, describe analytical methods taking account of sampling strategy <b>NA</b><br>(e) Describe any sensitivity analyses <b>NA</b> |
| <b>Results</b>               |         |                                                                                                                                                                                                                                                                                                                                                                                                                                                                |
| Participants                 | 13*     | (a) Report numbers of individuals at each stage of study—eg numbers potentially eligible, examined for eligibility, confirmed eligible, included in the study, completing follow-up, and analysed <b>Yes, Page 7 line 6-35.</b><br>(b) Give reasons for non-participation at each stage <b>NA</b><br>(c) Consider use of a flow diagram <b>NA</b>                                                                                                              |
| Descriptive data             | 14*     | (a) Give characteristics of study participants (eg demographic, clinical, social) and information on exposures and potential confounders <b>Yes, Table 3.</b><br>(b) Indicate number of participants with missing data for each variable of interest <b>Yes, Table 3.</b>                                                                                                                                                                                      |
| Outcome data                 | 15*     | Report numbers of outcome events or summary measures <b>Yes, Table 2 and 3.</b>                                                                                                                                                                                                                                                                                                                                                                                |
| Main results                 | 16      | (a) Give unadjusted estimates and, if applicable, confounder-adjusted estimates and                                                                                                                                                                                                                                                                                                                                                                            |

their precision (eg, 95% confidence interval). Make clear which confounders were adjusted for and why they were included **Yes, Table 4 and 6, reasons for adjusted estimates were mentioned in Page 6 line 40-50.**

(b) Report category boundaries when continuous variables were categorized **Yes, table 3.**

(c) If relevant, consider translating estimates of relative risk into absolute risk for a meaningful time period **NA**

|                          |    |                                                                                                                                                                                                            |
|--------------------------|----|------------------------------------------------------------------------------------------------------------------------------------------------------------------------------------------------------------|
| Other analyses           | 17 | Report other analyses done—eg analyses of subgroups and interactions, and sensitivity analyses <b>NA</b>                                                                                                   |
| <b>Discussion</b>        |    |                                                                                                                                                                                                            |
| Key results              | 18 | Summarise key results with reference to study objectives <b>Yes, Page 9 line 14-27, and line 39-48.</b>                                                                                                    |
| Limitations              | 19 | Discuss limitations of the study, taking into account sources of potential bias or imprecision. Discuss both direction and magnitude of any potential bias <b>Yes, Page 10 Line 28-40.</b>                 |
| Interpretation           | 20 | Give a cautious overall interpretation of results considering objectives, limitations, multiplicity of analyses, results from similar studies, and other relevant evidence <b>Yes, Page 10 Line 28-40.</b> |
| Generalisability         | 21 | Discuss the generalisability (external validity) of the study results <b>Yes, Page 10 Line 15-18.</b>                                                                                                      |
| <b>Other information</b> |    |                                                                                                                                                                                                            |
| Funding                  | 22 | Give the source of funding and the role of the funders for the present study and, if applicable, for the original study on which the present article is based <b>Yes, Page 10 Line 42-44.</b>              |

\*Give information separately for exposed and unexposed groups.

**Note:** An Explanation and Elaboration article discusses each checklist item and gives methodological background and published examples of transparent reporting. The STROBE checklist is best used in conjunction with this article (freely available on the Web sites of PLoS Medicine at <http://www.plosmedicine.org/>, Annals of Internal Medicine at <http://www.annals.org/>, and Epidemiology at <http://www.epidem.com/>). Information on the STROBE Initiative is available at [www.strobe-statement.org](http://www.strobe-statement.org).
