# Supplementary material for: Epidemiology and disease burden of complex wounds for inpatients in China: an observational study from Sichuan province
Source: PubMed Central journal article supplement — BMJ Open. 2020 Nov 6;10(11):e039894. doi: 10.1136/bmjopen-2020-039894 (PMC7651747; doi:10.1136/bmjopen-2020-039894), 2020-11-06
Supplement: bmjopen-2020-039894supp001.pdf [file bmjopen-2020-039894supp001.pdf]

## APPENDIX

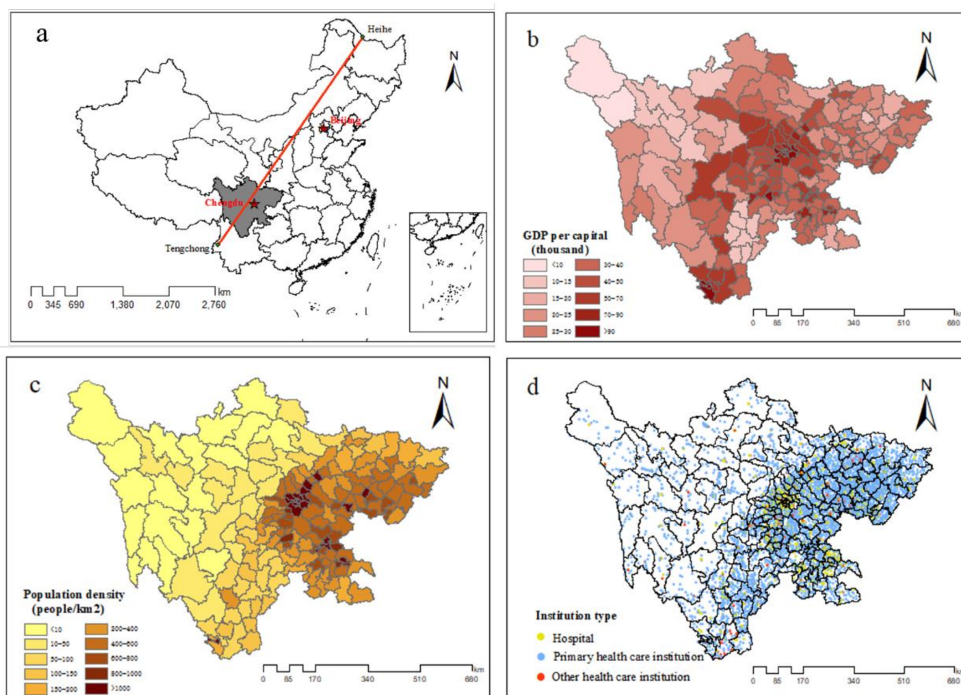

**Figure A1.** Characters of Sichuan province.

(a) Geographic position of Sichuan; (b) Per capital GDP among counties in 2017; (c) Population density among counties in 2017; (d) Distribution of health care institutions in 2018.

**Table A1.** Ghost table for discharge data**Home page of inpatient record**

Year \_\_\_\_\_

Name of Hospital \_\_\_\_\_ (Organization code: □□□□□□□□ - □)

Number of Health Card:

Hospitalization count:

Patient's identification number:

| Name _____ Gender <input type="checkbox"/> 1.M <input type="checkbox"/> 2.F Birthday _____ Age _____                                                                                                     |        |                                                                                |                                   |
|----------------------------------------------------------------------------------------------------------------------------------------------------------------------------------------------------------|--------|--------------------------------------------------------------------------------|-----------------------------------|
| Nationality _____                                                                                                                                                                                        |        | Neonatal birth weight _____ g Neonatal admission weight _____ g                |                                   |
| Birthplace _____                                                                                                                                                                                         |        | Native place _____ Ethnic group _____                                          |                                   |
| ID number _____                                                                                                                                                                                          |        | Occupation _____ Marital status _____                                          |                                   |
| Present address _____                                                                                                                                                                                    |        | Tel _____ Post code _____                                                      |                                   |
| Registered address _____                                                                                                                                                                                 |        | Post code _____                                                                |                                   |
| Work address _____                                                                                                                                                                                       |        | Office Tel _____ Post code _____                                               |                                   |
| Contact person _____                                                                                                                                                                                     |        | Relationship _____ Address _____ Tel _____                                     |                                   |
| Admission type <input type="checkbox"/> 1. emergency <input type="checkbox"/> 2. outpatient clinic                                                                                                       |        |                                                                                |                                   |
| 3. Referred from other institutions and its name is _____ 9. others                                                                                                                                      |        |                                                                                |                                   |
| Admission time _____ year _____ month _____ day _____ hour _____ minute                                                                                                                                  |        |                                                                                |                                   |
| Hospital department _____                                                                                                                                                                                |        | Inpatient ward number _____ The department the patient transferred to is _____ |                                   |
| Discharge time _____ year _____ month _____ day _____ hour _____ minute                                                                                                                                  |        |                                                                                |                                   |
| Diagnosis in outpatient (emergency) department _____                                                                                                                                                     |        | ICD-10 _____                                                                   |                                   |
| Health status at admission <input type="checkbox"/> 1. critically ill <input type="checkbox"/> 2. acute <input type="checkbox"/> 3. ordinary                                                             |        |                                                                                |                                   |
| Diagnosis at admission _____                                                                                                                                                                             |        | ICD-10 _____ Date of making the principal diagnosis _____                      |                                   |
| Whether the patient was critically ill during hospitalization <input type="checkbox"/> 1.yes <input type="checkbox"/> 2.no                                                                               |        |                                                                                |                                   |
| Diagnosis on Discharge                                                                                                                                                                                   | ICD-10 | Disease status at admission (DSA)                                              | Disease status on discharge (DSD) |
| Principal diagnosis :                                                                                                                                                                                    |        |                                                                                |                                   |
| Other diagnosis :                                                                                                                                                                                        |        |                                                                                |                                   |
|                                                                                                                                                                                                          |        |                                                                                |                                   |
|                                                                                                                                                                                                          |        |                                                                                |                                   |
|                                                                                                                                                                                                          |        |                                                                                |                                   |
|                                                                                                                                                                                                          |        |                                                                                |                                   |
|                                                                                                                                                                                                          |        |                                                                                |                                   |
|                                                                                                                                                                                                          |        |                                                                                |                                   |
|                                                                                                                                                                                                          |        |                                                                                |                                   |
|                                                                                                                                                                                                          |        |                                                                                |                                   |
|                                                                                                                                                                                                          |        |                                                                                |                                   |
| DSA: 1.yes 2.clinically undetermined 3.unclear 4.no                                                                                                                                                      |        | DSD: 1.cured 2.improved 3.not cured 4.deceased 5.others                        |                                   |
| Cause of injury/poisoning _____                                                                                                                                                                          |        | ICD-10 _____                                                                   |                                   |
| pathological diagnosis: _____                                                                                                                                                                            |        | ICD-10 _____ Pathological examination number _____                             |                                   |
| TNM stage: <input type="checkbox"/> 1.I <input type="checkbox"/> 2.II <input type="checkbox"/> 3.III <input type="checkbox"/> 4.IV                                                                       |        |                                                                                |                                   |
| drug allergy <input type="checkbox"/> 1.no 2.yes, and the allergic drug is: _____ Autopsy of deceased patient <input type="checkbox"/> 1.yes <input type="checkbox"/> 2.no                               |        |                                                                                |                                   |
| Blood type <input type="checkbox"/> 1.A <input type="checkbox"/> 2.B <input type="checkbox"/> 3.O <input type="checkbox"/> 4.AB <input type="checkbox"/> 5.unclear <input type="checkbox"/> 6. unchecked |        |                                                                                |                                   |
| Rh <input type="checkbox"/> 1. negative <input type="checkbox"/> 2. positive <input type="checkbox"/> 3. unclear <input type="checkbox"/> 4. unchecked                                                   |        |                                                                                |                                   |
| Follow up clinic <input type="checkbox"/> 1.yes <input type="checkbox"/> 2.no                                                                                                                            |        | Follow-up period _____                                                         |                                   |

| Section director's name _____ Chief doctor _____ Attending doctor _____ Visiting staff _____<br>Resident doctor _____ Primary nurse _____ Refresher doctor _____ Intern _____ coder _____                                                                                                                                                                                                                                                                                                                                                                                                                                                                                                                                                                                                                                                                                                                                                                                                                                                                                                                                                                                                                                                                                                                                                                                                                                                                                                                   |      |       |                       |                  |             |              |                     |            |                   |
|-------------------------------------------------------------------------------------------------------------------------------------------------------------------------------------------------------------------------------------------------------------------------------------------------------------------------------------------------------------------------------------------------------------------------------------------------------------------------------------------------------------------------------------------------------------------------------------------------------------------------------------------------------------------------------------------------------------------------------------------------------------------------------------------------------------------------------------------------------------------------------------------------------------------------------------------------------------------------------------------------------------------------------------------------------------------------------------------------------------------------------------------------------------------------------------------------------------------------------------------------------------------------------------------------------------------------------------------------------------------------------------------------------------------------------------------------------------------------------------------------------------|------|-------|-----------------------|------------------|-------------|--------------|---------------------|------------|-------------------|
| The quality of medical record <input type="checkbox"/> 1. high 2. medium 3. low      Quality control doctors _____<br>Quality control nurses _____      Date of making quality control _____                                                                                                                                                                                                                                                                                                                                                                                                                                                                                                                                                                                                                                                                                                                                                                                                                                                                                                                                                                                                                                                                                                                                                                                                                                                                                                                |      |       |                       |                  |             |              |                     |            |                   |
| Prophylactic use of antimicrobial drugs for primary surgical incision <input type="checkbox"/> 1. yes 2. no<br>Duration(hours): _____ Drug combination <input type="checkbox"/> 1. yes 2. no                                                                                                                                                                                                                                                                                                                                                                                                                                                                                                                                                                                                                                                                                                                                                                                                                                                                                                                                                                                                                                                                                                                                                                                                                                                                                                                |      |       |                       |                  |             |              |                     |            |                   |
| Surgery code                                                                                                                                                                                                                                                                                                                                                                                                                                                                                                                                                                                                                                                                                                                                                                                                                                                                                                                                                                                                                                                                                                                                                                                                                                                                                                                                                                                                                                                                                                | time | level | Name of the operation | Operating Doctor |             |              | Wound healing grade | anesthesia | Anesthesiologists |
|                                                                                                                                                                                                                                                                                                                                                                                                                                                                                                                                                                                                                                                                                                                                                                                                                                                                                                                                                                                                                                                                                                                                                                                                                                                                                                                                                                                                                                                                                                             |      |       |                       | Operator         | Assistant I | Assistant II |                     |            |                   |
|                                                                                                                                                                                                                                                                                                                                                                                                                                                                                                                                                                                                                                                                                                                                                                                                                                                                                                                                                                                                                                                                                                                                                                                                                                                                                                                                                                                                                                                                                                             |      |       |                       |                  |             |              | /                   |            |                   |
|                                                                                                                                                                                                                                                                                                                                                                                                                                                                                                                                                                                                                                                                                                                                                                                                                                                                                                                                                                                                                                                                                                                                                                                                                                                                                                                                                                                                                                                                                                             |      |       |                       |                  |             |              | /                   |            |                   |
|                                                                                                                                                                                                                                                                                                                                                                                                                                                                                                                                                                                                                                                                                                                                                                                                                                                                                                                                                                                                                                                                                                                                                                                                                                                                                                                                                                                                                                                                                                             |      |       |                       |                  |             |              | /                   |            |                   |
|                                                                                                                                                                                                                                                                                                                                                                                                                                                                                                                                                                                                                                                                                                                                                                                                                                                                                                                                                                                                                                                                                                                                                                                                                                                                                                                                                                                                                                                                                                             |      |       |                       |                  |             |              | /                   |            |                   |
|                                                                                                                                                                                                                                                                                                                                                                                                                                                                                                                                                                                                                                                                                                                                                                                                                                                                                                                                                                                                                                                                                                                                                                                                                                                                                                                                                                                                                                                                                                             |      |       |                       |                  |             |              | /                   |            |                   |
|                                                                                                                                                                                                                                                                                                                                                                                                                                                                                                                                                                                                                                                                                                                                                                                                                                                                                                                                                                                                                                                                                                                                                                                                                                                                                                                                                                                                                                                                                                             |      |       |                       |                  |             |              | /                   |            |                   |
|                                                                                                                                                                                                                                                                                                                                                                                                                                                                                                                                                                                                                                                                                                                                                                                                                                                                                                                                                                                                                                                                                                                                                                                                                                                                                                                                                                                                                                                                                                             |      |       |                       |                  |             |              | /                   |            |                   |
|                                                                                                                                                                                                                                                                                                                                                                                                                                                                                                                                                                                                                                                                                                                                                                                                                                                                                                                                                                                                                                                                                                                                                                                                                                                                                                                                                                                                                                                                                                             |      |       |                       |                  |             |              | /                   |            |                   |
| Clinical pathway management <input type="checkbox"/> 1. yes 2. no    Complete clinical pathway <input type="checkbox"/> 1. yes 2. no, and the reason is _____<br>Variation <input type="checkbox"/> 1. yes    2. no; the reason is: _____                                                                                                                                                                                                                                                                                                                                                                                                                                                                                                                                                                                                                                                                                                                                                                                                                                                                                                                                                                                                                                                                                                                                                                                                                                                                   |      |       |                       |                  |             |              |                     |            |                   |
| Discharge type <input type="checkbox"/><br>1. Discharge on doctor's orders<br>2. Be referred to a superior hospital, and its name is _____<br>3. Be referred to primary health institution(THC/CHC), and its name is _____<br>4. Leave hospital without medical advice    5. dead    9. others                                                                                                                                                                                                                                                                                                                                                                                                                                                                                                                                                                                                                                                                                                                                                                                                                                                                                                                                                                                                                                                                                                                                                                                                              |      |       |                       |                  |             |              |                     |            |                   |
| Does she/he has the plan to be readmitted within 31 days <input type="checkbox"/> 1. no    2. yes, and the reason is _____                                                                                                                                                                                                                                                                                                                                                                                                                                                                                                                                                                                                                                                                                                                                                                                                                                                                                                                                                                                                                                                                                                                                                                                                                                                                                                                                                                                  |      |       |                       |                  |             |              |                     |            |                   |
| How long did the craniocerebral injury patient remain in a coma:<br>Before admission, she/he was in coma for _____ minutes<br>After admission, she/he was in coma for _____ minutes                                                                                                                                                                                                                                                                                                                                                                                                                                                                                                                                                                                                                                                                                                                                                                                                                                                                                                                                                                                                                                                                                                                                                                                                                                                                                                                         |      |       |                       |                  |             |              |                     |            |                   |
| Whether the patient was readmitted for the same disease <input type="checkbox"/> 1. yes    2. no<br>How long has it been since the last discharge? _____ days                                                                                                                                                                                                                                                                                                                                                                                                                                                                                                                                                                                                                                                                                                                                                                                                                                                                                                                                                                                                                                                                                                                                                                                                                                                                                                                                               |      |       |                       |                  |             |              |                     |            |                   |
| <b>Inpatient expense (yuan):</b> Total expense _____ (out-of-pocket payment: _____ others: _____)<br><b>1. Comprehensive medical services:</b><br>(1) General medical service expense: _____ (2) General treatment expense: _____<br>(3) Nursing expense: _____ (4) Other expense: _____<br><b>2. Diagnosis:</b> (5) Pathological diagnosis: _____ (6) laboratory diagnosis: _____<br>(7) Imaging diagnosis: _____ (8) Clinical diagnosis: _____<br><b>3. Treatment:</b> (9) Non-surgical treatment: _____ (Clinical physiotherapy: _____)<br>(10) Surgical treatment expense: _____ (Anesthetic expense: _____ Operation: _____)<br><b>4. Recovery:</b> (11) Recovery expense: _____<br><b>5. Traditional Chinese treatment:</b> (12) Traditional Chinese treatment expense: _____<br><b>6. Western medicine:</b> (13) Western medicine expense: _____ (Antimicrobial expense: _____)<br><b>7. Traditional Chinese medicine (TCM):</b><br>(14) Proprietary Chinese medicine expense _____ (15) Chinese herbal medicine expense: _____<br><b>8. Blood and blood products:</b> (16) Blood expense: _____ (17) Albumin products: _____<br>(18) Globulin products: _____ (19) Hemagglutinin sub products: _____ (20) Subclass of cytokines: _____<br><b>9. Consumable materials:</b> (21) Disposable medical materials for inspection: _____<br>(22) Disposable medical materials for treatment: _____<br>(23) Disposable medical materials for surgery: _____<br><b>10. Others:</b> (24) Other expense: _____ |      |       |                       |                  |             |              |                     |            |                   |

**Table A2.** Full results of two-level hierarchical models

| <i>Explaining variables</i>                                          | <i>Dependent variable</i> |                       |                       |                       |
|----------------------------------------------------------------------|---------------------------|-----------------------|-----------------------|-----------------------|
|                                                                      | log(LOS)                  | log(expense)          | log(LOS)              | log(expense)          |
|                                                                      | (1)                       | (2)                   | (3)                   | (4)                   |
| Wounds                                                               | 0.390***<br>(0.006)       | 0.472***<br>(0.006)   |                       |                       |
| <i>Wounds type (vs patients without complex wounds)</i>              |                           |                       |                       |                       |
| Pressure ulcers                                                      |                           |                       | 0.233***<br>(0.009)   | 0.484***<br>(0.009)   |
| Diabetic ulcers                                                      |                           |                       | 0.183***<br>(0.014)   | 0.194***<br>(0.013)   |
| Venous leg ulcers                                                    |                           |                       | 0.268***<br>(0.044)   | 0.137**<br>(0.042)    |
| Non-healing surgical wounds                                          |                           |                       | 0.939***<br>(0.013)   | 0.807***<br>(0.013)   |
| Other ulcers                                                         |                           |                       | 0.380***<br>(0.020)   | 0.333***<br>(0.019)   |
| Age (year)                                                           | 0.003***<br>(0.00002)     | 0.008***<br>(0.00002) | 0.003***<br>(0.00002) | 0.008***<br>(0.00002) |
| <i>Gender (vs male)</i>                                              |                           |                       |                       |                       |
| Female                                                               | -0.061***<br>(0.001)      | -0.056***<br>(0.001)  | -0.061***<br>(0.001)  | -0.056***<br>(0.001)  |
| Missing                                                              | -0.055***<br>(0.015)      | -0.061***<br>(0.014)  | -0.055***<br>(0.015)  | -0.061***<br>(0.014)  |
| Charlson Index                                                       | 0.075***<br>(0.0003)      | 0.116***<br>(0.0003)  | 0.075***<br>(0.0003)  | 0.116***<br>(0.0003)  |
| <i>Social insurance program (vs UEBMI) <sup>a</sup></i>              |                           |                       |                       |                       |
| URBMI                                                                | -0.059***<br>(0.001)      | -0.036***<br>(0.001)  | -0.059***<br>(0.001)  | -0.036***<br>(0.001)  |
| NRCMS                                                                | -0.078***<br>(0.002)      | -0.036***<br>(0.002)  | -0.078***<br>(0.002)  | -0.036***<br>(0.002)  |
| Others                                                               | -0.127***<br>(0.001)      | -0.078***<br>(0.001)  | -0.127***<br>(0.001)  | -0.078***<br>(0.001)  |
| <i>Occupation (vs Civil Servants &amp; active army) <sup>b</sup></i> |                           |                       |                       |                       |
| Professionals & technical                                            | -0.055***<br>(0.006)      | -0.031***<br>(0.006)  | -0.055***<br>(0.006)  | -0.031***<br>(0.006)  |

|                                                             |                      |                      |                      |                      |
|-------------------------------------------------------------|----------------------|----------------------|----------------------|----------------------|
| Office clerk & manager                                      | -0.057***<br>(0.005) | -0.024***<br>(0.005) | -0.057***<br>(0.005) | -0.024***<br>(0.005) |
| Worker                                                      | 0.013*<br>(0.005)    | 0.050***<br>(0.005)  | 0.013*<br>(0.005)    | 0.050***<br>(0.005)  |
| Agricultural labor                                          | -0.006<br>(0.005)    | 0.050***<br>(0.005)  | -0.006<br>(0.005)    | 0.050***<br>(0.005)  |
| Student                                                     | -0.051***<br>(0.005) | -0.100***<br>(0.005) | -0.050***<br>(0.005) | -0.100***<br>(0.005) |
| Freelancer                                                  | -0.057***<br>(0.005) | -0.001<br>(0.005)    | -0.057***<br>(0.005) | -0.001<br>(0.005)    |
| Self-employed                                               | -0.051***<br>(0.007) | -0.017*<br>(0.007)   | -0.051***<br>(0.007) | -0.017*<br>(0.007)   |
| Unemployed                                                  | -0.048***<br>(0.005) | -0.014**<br>(0.005)  | -0.048***<br>(0.005) | -0.014**<br>(0.005)  |
| Retired                                                     | 0.062***<br>(0.005)  | 0.030***<br>(0.005)  | 0.062***<br>(0.005)  | 0.030***<br>(0.005)  |
| Others                                                      | 0.004<br>(0.005)     | 0.021***<br>(0.005)  | 0.005<br>(0.005)     | 0.021***<br>(0.005)  |
| <i>Whether or not surgery was required (vs No)</i>          |                      |                      |                      |                      |
| Surgery (Yes)                                               | 0.127***<br>(0.001)  | 0.714***<br>(0.001)  | 0.126***<br>(0.001)  | 0.714***<br>(0.001)  |
| <i>Health care institution levels (vs primary hospital)</i> |                      |                      |                      |                      |
| Secondary hospital                                          | 0.067<br>(0.035)     | 0.443***<br>(0.043)  | 0.067<br>(0.035)     | 0.443***<br>(0.043)  |
| Tertiary hospital                                           | -0.190***<br>(0.049) | 0.681***<br>(0.061)  | -0.190***<br>(0.049) | 0.681***<br>(0.061)  |
| Unassigned hospital                                         | 0.055<br>(0.028)     | 0.168***<br>(0.035)  | 0.055<br>(0.028)     | 0.168***<br>(0.035)  |
| Primary healthcare sector                                   | -0.456***<br>(0.036) | -0.825***<br>(0.045) | -0.456***<br>(0.036) | -0.825***<br>(0.045) |
| Other providers                                             | -0.548***<br>(0.048) | 0.014<br>(0.059)     | -0.547***<br>(0.048) | 0.014<br>(0.059)     |
| <i>Ownership type (vs private)</i>                          |                      |                      |                      |                      |
| Public                                                      | 0.222***<br>(0.027)  | -0.041<br>(0.034)    | 0.222***<br>(0.027)  | -0.041<br>(0.034)    |

|              |           |           |           |           |
|--------------|-----------|-----------|-----------|-----------|
| Missing      | 0.171*    | -0.325*** | 0.172*    | -0.325*** |
|              | (0.067)   | (0.083)   | (0.067)   | (0.083)   |
| Constant     | 1.848***  | 7.337***  | 1.848***  | 7.337***  |
|              | (0.025)   | (0.031)   | (0.025)   | (0.031)   |
| Observations | 4,021,677 | 4,021,677 | 4,021,677 | 4,021,677 |

Note: Cells contain coefficient (and standard error). \*p <0.05, \*\*p<0.01, \*\*\*p<0.001.

<sup>a</sup>. UEBMI (Urban Employee Basic Medical Insurance); URBMI (Urban Resident Basic Medical Insurance); NRCMS (New Rural Cooperative System).

<sup>b</sup>. Occupations with too small a sample were merged with similar occupations.

**Table A3.** Inpatient wounds point prevalence estimates by wound types and demographic characteristics

| Variable         | Pressure ulcers |                           | Diabetic ulcers |                           | Venous leg ulcers |                           | Non-healing surgical wounds |                           | Other ulcers |                           |
|------------------|-----------------|---------------------------|-----------------|---------------------------|-------------------|---------------------------|-----------------------------|---------------------------|--------------|---------------------------|
|                  | frequency       | point prevalence (95% CI) | frequency       | point prevalence (95% CI) | frequency         | point prevalence (95% CI) | frequency                   | point prevalence (95% CI) | frequency    | point prevalence (95% CI) |
| <i>Age group</i> |                 |                           |                 |                           |                   |                           |                             |                           |              |                           |
| 0-9              | 4               | 0.009<br>(0.004, 0.024)   | 0               | 0.000<br>(0.000, 0.009)   | 0                 | 0.000<br>(0.000, 0.009)   | 73                          | 0.172<br>(0.137, 0.217)   | 18           | 0.042<br>(0.027, 0.067)   |
| 10-19            | 17              | 0.173<br>(0.108, 0.277)   | 0               | 0.000<br>(0.000, 0.039)   | 0                 | 0.000<br>(0.000, 0.039)   | 125                         | 1.272<br>(1.068, 1.515)   | 29           | 0.295<br>(0.205, 0.424)   |
| 20-29            | 48              | 0.164<br>(0.123, 0.217)   | 7               | 0.024<br>(0.012, 0.049)   | 2                 | 0.007<br>(0.002, 0.025)   | 344                         | 1.172<br>(1.055, 1.303)   | 61           | 0.208<br>(0.162, 0.267)   |
| 30-39            | 104             | 0.369<br>(0.305, 0.447)   | 43              | 0.153<br>(0.113, 0.206)   | 17                | 0.060<br>(0.038, 0.097)   | 331                         | 1.175<br>(1.055, 1.308)   | 89           | 0.316<br>(0.257, 0.389)   |
| 40-49            | 347             | 0.722<br>(0.650, 0.802)   | 221             | 0.460<br>(0.403, 0.525)   | 81                | 0.169<br>(0.136, 0.209)   | 695                         | 1.446<br>(1.342, 1.557)   | 225          | 0.468<br>(0.411, 0.533)   |
| 50-59            | 498             | 0.871<br>(0.798, 0.951)   | 611             | 1.068<br>(0.987, 1.157)   | 223               | 0.390<br>(0.342, 0.445)   | 831                         | 1.453<br>(1.358, 1.555)   | 326          | 0.570<br>(0.511, 0.635)   |
| 60-69            | 983             | 1.176<br>(1.105, 1.252)   | 891             | 1.066<br>(0.998, 1.138)   | 415               | 0.497<br>(0.451, 0.547)   | 997                         | 1.193<br>(1.121, 1.269)   | 477          | 0.571<br>(0.522, 0.624)   |
| 70-79            | 1,643           | 2.296<br>(2.188, 2.409)   | 939             | 1.312<br>(1.231, 1.399)   | 287               | 0.401<br>(0.357, 0.45)    | 542                         | 0.757<br>(0.696, 0.824)   | 474          | 0.662<br>(0.605, 0.725)   |
| 80-89            | 1,822           | 6.085<br>(5.813, 6.370)   | 501             | 1.673<br>(1.533, 1.826)   | 104               | 0.347<br>(0.287, 0.421)   | 136                         | 0.454<br>(0.384, 0.537)   | 262          | 0.875<br>(0.775, 0.987)   |

|                              |       |                            |       |                         |       |                         |       |                         |       |                         |
|------------------------------|-------|----------------------------|-------|-------------------------|-------|-------------------------|-------|-------------------------|-------|-------------------------|
| 90+                          | 449   | 13.480<br>(12.296, 14.776) | 56    | 1.681<br>(1.295, 2.182) | 10    | 0.300<br>(0.163, 0.553) | 16    | 0.480<br>(0.296, 0.780) | 52    | 1.561<br>(1.191, 2.046) |
| <i>Gender</i>                |       |                            |       |                         |       |                         |       |                         |       |                         |
| Male                         | 3,466 | 1.809<br>(1.749, 1.870)    | 1,848 | 0.964<br>(0.921, 1.009) | 810   | 0.423<br>(0.395, 0.453) | 2,263 | 1.181<br>(1.133, 1.230) | 1,289 | 0.673<br>(0.637, 0.710) |
| Female                       | 2,449 | 1.158<br>(1.113, 1.205)    | 1,421 | 0.672<br>(0.638, 0.708) | 326   | 0.154<br>(0.138, 0.172) | 1,826 | 0.864<br>(0.825, 0.904) | 724   | 0.342<br>(0.318, 0.368) |
| Missing                      | 0     | 0.000<br>(0.000, 1.265)    | 0     | 0.000<br>(0.000, 1.265) | 3     | 0.989<br>(0.336, 2.904) | 1     | 0.330<br>(0.017, 1.865) | 0     | 0.000<br>(0.000, 1.265) |
| <i>Ethnic group</i>          |       |                            |       |                         |       |                         |       |                         |       |                         |
| Minority                     | 106   | 0.512<br>(0.424, 0.619)    | 42    | 0.203<br>(0.150, 0.274) | 17    | 0.082<br>(0.051, 0.132) | 244   | 1.179<br>(1.040, 1.337) | 62    | 0.300<br>(0.234, 0.384) |
| Han                          | 5,809 | 1.518<br>(1.479, 1.557)    | 3,227 | 0.843<br>(0.815, 0.873) | 1,112 | 0.293<br>(0.277, 0.311) | 3,846 | 1.005<br>(0.974, 1.037) | 1,951 | 0.510<br>(0.488, 0.533) |
| <i>Occupation</i>            |       |                            |       |                         |       |                         |       |                         |       |                         |
| Civil Servants & active army | 31    | 1.524<br>(1.074, 2.162)    | 11    | 0.541<br>(0.302, 0.968) | 5     | 0.246<br>(0.105, 0.575) | 29    | 1.426<br>(0.993, 2.047) | 12    | 0.590<br>(0.338, 1.031) |
| Professionals & technical    | 30    | 0.904<br>(0.633, 1.290)    | 15    | 0.452<br>(0.274, 0.745) | 4     | 0.121<br>(0.047, 0.310) | 39    | 1.175<br>(0.86, 1.606)  | 8     | 0.241<br>(0.122, 0.476) |
| Office clerk & manager       | 78    | 0.755<br>(0.605, 0.942)    | 55    | 0.533<br>(0.409, 0.693) | 18    | 0.174<br>(0.11, 0.275)  | 152   | 1.472<br>(1.256, 1.725) | 44    | 0.426<br>(0.317, 0.572) |
| Worker                       | 103   | 1.253<br>(1.033, 1.519)    | 60    | 0.730<br>(0.567, 0.939) | 19    | 0.231<br>(0.148, 0.361) | 115   | 1.399<br>(1.166, 1.679) | 59    | 0.718<br>(0.557, 0.926) |
| Agricultural labor           | 1,999 | 1.100<br>(1.053, 1.150)    | 1,226 | 0.675<br>(0.638, 0.714) | 608   | 0.335<br>(0.309, 0.362) | 1,549 | 0.853<br>(0.811, 0.896) | 902   | 0.497<br>(0.465, 0.53)  |



|               |       |                         |       |                         |     |                         |       |                         |     |                         |
|---------------|-------|-------------------------|-------|-------------------------|-----|-------------------------|-------|-------------------------|-----|-------------------------|
| Student       | 19    | 0.183<br>(0.117, 0.286) | 4     | 0.039<br>(0.015, 0.099) | 2   | 0.019<br>(0.005, 0.07)  | 87    | 0.839<br>(0.681, 1.035) | 21  | 0.203<br>(0.133, 0.31)  |
| Freelancer    | 124   | 1.259<br>(1.056, 1.501) | 72    | 0.731<br>(0.581, 0.921) | 18  | 0.183<br>(0.116, 0.289) | 136   | 1.381<br>(1.168, 1.633) | 77  | 0.782<br>(0.626, 0.977) |
| Self-employed | 13    | 0.683<br>(0.399, 1.169) | 15    | 0.789<br>(0.478, 1.301) | 6   | 0.315<br>(0.145, 0.688) | 18    | 0.946<br>(0.599, 1.495) | 11  | 0.578<br>(0.323, 1.035) |
| Unemployed    | 205   | 1.640<br>(1.431, 1.881) | 85    | 0.680<br>(0.550, 0.841) | 30  | 0.240<br>(0.168, 0.343) | 113   | 0.904<br>(0.752, 1.087) | 58  | 0.464<br>(0.359, 0.600) |
| Retired       | 1,113 | 5.894<br>(5.559, 6.250) | 484   | 2.563<br>(2.345, 2.802) | 36  | 0.191<br>(0.138, 0.264) | 186   | 0.985<br>(0.853, 1.137) | 115 | 0.609<br>(0.507, 0.731) |
| Others        | 2,200 | 1.524<br>(1.462, 1.589) | 1,242 | 0.861<br>(0.814, 0.910) | 393 | 0.272<br>(0.247, 0.301) | 1,666 | 1.154<br>(1.100, 1.211) | 706 | 0.489<br>(0.454, 0.527) |
